# Supplementary material for: Air pollutants and outpatient visits for influenza-like illness in Beijing, China
Source: PeerJ journal article supplement (doi:10.7717/peerj.11397), 2021-06-02
Supplement: RawData.xlsx [file RawData.xlsx]

## Sheet: Sheet1
date	AQI	grade	pm25	pm10	so2	co	no2	o3h8	ILI15to24	ILI25to59	ILI60to100	AllILIpatients	samllevp	bigevp	meanprs	highprs	lowprs	meantem	hightem	lowtem	meanrhu	lowrhu	nightpre	daypre	pre	meanwin	maxwin	maxwinori	superwin	superwinori	ssd	meangst	highgst	lowgst
2015-01-01	58	good	41	67	24	1.1	50	44	8	14	30	52	25	32766	10271	10312	10223	-21	25	-77	22	12	0	0	0	23	58	15	116	14	77	-50	116	-144
2015-01-02	69	good	51	80	31	1.3	60	38	55	58	5	118	20	32766	10254	10288	10221	-20	48	-65	31	17	0	0	0	18	43	11	68	11	78	-49	158	-137
2015-01-03	197	moderate pollution	148	193	67	3.2	101	14	63	63	8	134	11	32766	10138	10237	10098	-20	36	-71	38	26	0	0	0	12	28	3	38	4	66	-46	103	-124
2015-01-04	224	severe pollution	174	225	75	3.7	120	22	67	74	10	151	15	32766	10125	10148	10111	2	86	-70	42	19	0	0	0	14	30	4	41	4	56	-25	163	-121
2015-01-05	139	mild pollution	107	156	57	2.9	70	67	51	60	9	120	43	32766	10153	10231	10113	39	110	9	35	13	0	0	0	40	84	16	158	16	57	25	189	-41
2015-01-06	51	good	34	51	22	0.8	40	65	41	45	5	91	44	32766	10240	10260	10215	-3	39	-29	18	10	0	0	0	28	76	1	138	1	81	-26	151	-93
2015-01-07	84	good	62	89	38	1.8	64	27	36	41	5	82	17	32766	10258	10280	10224	-19	33	-68	35	17	0	0	0	9	34	4	52	6	75	-51	129	-120
2015-01-08	163	moderate pollution	124	151	49	3	92	11	34	57	3	94	9	32766	10261	10287	10234	-19	41	-66	65	31	0	0	0	14	28	10	41	10	64	-50	111	-119
2015-01-09	98	good	73	93	32	1.6	61	55	30	32	4	66	24	32766	10249	10274	10237	11	75	-49	34	15	0	0	0	20	51	1	92	1	83	-27	179	-110
2015-01-10	195	moderate pollution	147	174	55	2.8	94	32	32	38	3	73	22	32766	10187	10239	10155	14	111	-52	38	14	0	0	0	18	39	12	56	12	73	-27	188	-122
2015-01-11	53	good	37	55	18	0.9	47	44	33	43	6	82	16	32766	10286	10316	10179	21	65	-22	33	18	0	0	0	18	52	3	79	4	80	-14	176	-98
2015-01-12	153	moderate pollution	117	146	43	2.2	72	25	33	42	5	80	15	32766	10329	10360	10311	-11	42	-55	51	25	0	0	0	12	38	10	60	10	72	-37	136	-113
2015-01-13	206	severe pollution	156	183	54	2.8	92	14	20	40	5	65	8	32766	10283	10318	10260	-17	31	-43	67	42	0	0	0	13	25	4	41	5	61	-33	120	-98
2015-01-14	264	severe pollution	214	251	54	3.1	100	6	19	36	2	57	6	32766	10266	10277	10252	-11	10	-48	71	54	0	0	0	15	31	3	43	3	0	-31	29	-103
2015-01-15	378	gross pollution	328	375	34	4.7	111	6	23	38	6	67	3	32766	10241	10266	10220	-30	0	-53	90	73	0	0	0	15	25	10	36	10	0	-52	49	-104
2015-01-16	146	mild pollution	112	120	9	1.6	42	63	20	52	5	77	28	32766	10252	10305	10207	-2	27	-49	45	21	0	0	0	36	76	16	140	16	84	-6	116	-98
2015-01-17	81	good	60	71	30	1.2	57	51	19	21	4	44	20	32766	10284	10319	10244	-22	30	-68	34	25	0	0	0	21	54	16	97	16	75	-43	133	-134
2015-01-18	92	good	68	110	30	1.5	52	69	9	11	13	33	27	32766	10166	10244	10126	18	70	-15	34	18	0	0	0	31	78	15	149	16	61	16	174	-75
2015-01-19	62	good	43	74	25	1.3	59	64	9	26	5	40	30	32766	10215	10244	10180	13	67	-48	34	20	0	0	0	13	59	15	131	15	84	-15	179	-115
2015-01-20	111	mild pollution	84	108	44	2	74	23	8	16	2	26	14	32766	10185	10210	10158	-9	42	-51	62	35	0	0	0	18	37	2	73	2	68	-32	128	-107
2015-01-21	31	perfect	19	23	16	0.6	32	62	13	17	4	34	38	32766	10238	10258	10191	20	57	-22	30	18	0	0	0	36	59	16	113	1	93	2	172	-95
2015-01-22	128	mild pollution	98	121	39	2	80	26	13	9	2	24	8	32766	10209	10248	10176	-7	58	-70	42	25	0	0	0	17	46	11	70	10	74	-40	170	-131
2015-01-23	256	severe pollution	206	233	61	3.6	121	13	5	10	2	17	12	32766	10151	10178	10126	-6	68	-60	51	26	0	0	0	6	25	4	35	4	49	-27	176	-114
2015-01-24	126	mild pollution	96	145	33	2	70	26	9	12	3	24	14	32766	10223	10251	10162	10	39	-28	56	32	0	0	0	19	42	5	72	6	27	-10	167	-89
2015-01-25	178	moderate pollution	134	100	16	1.7	61	25	10	13	3	26	11	32766	10214	10243	10183	-3	34	-25	83	61	4	0	4	19	34	11	48	11	34	-6	136	-67
2015-01-26	134	mild pollution	102	106	11	1.7	43	59	13	15	5	33	25	32766	10247	10318	10180	-8	52	-47	57	14	0	0	0	32	84	1	141	2	5	-34	97	-96
2015-01-27	28	perfect	17	28	14	0.6	29	56	8	14	3	25	31	32766	10327	10350	10301	-35	13	-64	24	15	0	0	0	38	70	1	126	16	88	-38	162	-117
2015-01-28	52	good	37	47	21	1	49	41	8	14	3	25	17	32766	10303	10333	10279	-23	11	-56	26	19	0	0	0	18	33	2	55	1	63	-17	160	-124
2015-01-29	85	good	63	77	22	1.2	41	61	11	18	4	33	24	32766	10256	10283	10230	-2	42	-40	38	18	0	0	0	38	58	16	106	1	78	8	167	-63
2015-01-30	32	perfect	12	21	12	0.5	26	63	8	10	3	21	29	32766	10318	10338	10273	-13	32	-41	20	13	0	0	0	24	57	1	106	1	93	-27	176	-114
2015-01-31	42	perfect	30	42	19	0.8	43	49	10	10	3	23	15	32766	10344	10373	10316	-23	39	-69	22	13	0	0	0	15	35	1	68	1	84	-40	201	-138
2015-02-01	102	mild pollution	77	98	41	1.9	67	27	9	11	3	23	14	32766	10311	10331	10287	-27	29	-84	32	17	0	0	0	13	35	3	59	3	36	-43	192	-141
2015-02-02	185	moderate pollution	139	156	57	2.5	87	15	12	15	4	31	14	32766	10291	10304	10272	-14	42	-67	36	22	0	0	0	12	28	9	46	9	39	-27	142	-118
2015-02-03	153	moderate pollution	117	79	29	1.9	61	69	15	17	4	36	24	32766	10277	10300	10253	20	86	-46	54	17	0	0	0	19	51	15	96	1	79	1	186	-98
2015-02-04	36	perfect	10	32	9	0.4	20	71	7	20	4	31	47	32766	10280	10293	10242	16	69	-16	25	17	0	0	0	45	70	1	150	1	69	22	197	-63
2015-02-05	39	perfect	27	35	16	0.7	42	70	8	15	3	26	44	32766	10281	10310	10245	26	74	-14	28	20	0	0	0	24	82	1	162	1	93	22	232	-96
2015-02-06	88	good	65	78	30	1.8	72	45	5	12	3	20	21	32766	10191	10247	10161	17	98	-50	37	19	0	0	0	13	35	11	53	12	70	-14	228	-108
2015-02-07	37	perfect	13	26	10	0.4	22	73	1	14	0	15	50	32766	10256	10314	10172	22	60	-11	20	8	0	0	0	41	74	16	140	1	38	4	133	-84
2015-02-08	36	perfect	24	32	17	0.6	30	71	5	10	2	17	29	32766	10323	10353	10291	-36	18	-92	17	9	0	0	0	27	53	1	95	2	97	-24	217	-152
2015-02-09	142	mild pollution	109	127	48	1.9	79	40	7	11	3	21	21	32766	10245	10295	10192	-15	61	-92	28	14	0	0	0	20	34	11	51	10	89	-21	216	-136
2015-02-10	161	moderate pollution	123	138	47	2.4	94	50	4	13	4	21	23	32766	10129	10192	10087	21	133	-66	34	11	0	0	0	13	33	12	49	11	77	-13	274	-123
2015-02-11	58	good	41	56	23	1	44	76	5	10	3	18	37	32766	10126	10149	10100	44	102	-21	27	14	0	0	0	28	42	3	73	16	90	41	258	-99
2015-02-12	45	perfect	32	42	16	0.8	44	75	4	8	8	20	35	32766	10161	10184	10135	23	79	-40	32	14	0	0	0	21	54	1	97	1	93	19	256	-107
2015-02-13	158	moderate pollution	121	131	34	2.1	83	49	4	8	8	20	23	32766	10137	10165	10103	11	96	-56	48	22	0	0	0	14	38	11	61	12	85	4	230	-106
2015-02-14	286	severe pollution	236	239	55	3.2	109	62	5	13	6	24	22	32766	10084	10111	10066	28	107	-21	46	25	0	0	0	18	27	3	41	3	67	15	217	-79
2015-02-15	334	gross pollution	284	308	78	4.4	113	37	4	7	3	14	14	32766	10149	10164	10095	34	67	-15	52	37	0	0	0	14	24	9	37	3	0	2	120	-64
2015-02-16	159	moderate pollution	121	156	31	2.3	54	69	5	10	5	20	43	32766	10146	10163	10120	41	120	-30	47	17	0	0	0	23	65	15	127	15	93	30	246	-84
2015-02-17	41	perfect	22	41	10	0.5	28	77	6	11	3	20	51	32766	10199	10221	10153	49	105	19	31	21	0	0	0	20	51	3	89	2	94	56	287	-39
2015-02-18	64	good	46	57	18	0.7	31	80	3	6	2	11	39	32766	10267	10292	10221	37	109	-22	39	15	0	0	0	26	55	3	83	3	100	50	303	-88
2015-02-19	268	severe pollution	218	248	55	1.5	42	60	5	9	2	16	20	32766	10250	10277	10228	6	55	-30	56	27	0	5	5	20	57	11	98	11	37	-8	205	-84
2015-02-20	183	moderate pollution	138	29	9	1.4	38	53	9	11	3	23	4	32766	10180	10228	10153	4	11	-2	97	83	38	26	64	15	35	11	58	10	0	-2	3	-3
2015-02-21	202	severe pollution	152	172	9	1.6	32	69	10	18	7	35	15	32766	10136	10178	10098	6	45	0	77	19	24	0	24	27	93	15	179	14	8	-4	0	-13
2015-02-22	163	moderate pollution	42	277	4	0.4	14	73	4	12	11	27	38	32766	10195	10214	10167	-10	42	-42	26	17	0	0	0	46	78	15	179	1	98	-5	107	-58
2015-02-23	82	good	55	114	21	0.8	34	67	6	12	6	24	23	32766	10172	10198	10143	6	59	-61	33	21	0	0	0	22	49	11	81	11	95	8	169	-87
2015-02-24	203	severe pollution	153	213	34	2.1	59	55	7	11	4	22	14	32766	10113	10148	10086	6	67	-42	66	39	0	0	0	15	28	4	46	3	65	14	165	-63
2015-02-25	103	mild pollution	77	110	10	1.1	32	80	11	11	5	27	53	32766	10151	10179	10109	35	69	-10	33	10	0	0	0	42	69	16	127	16	87	40	209	-27
2015-02-26	39	perfect	13	26	6	0.4	18	77	11	14	3	28	42	32766	10220	10233	10180	20	62	-25	18	12	0	0	0	26	57	1	101	2	99	29	211	-75
2015-02-27	37	perfect	23	37	13	0.7	30	58	6	9	5	20	26	32766	10291	10318	10233	2	39	-24	35	15	0	0	0	23	40	3	71	3	0	20	151	-59
2015-02-28	162	moderate pollution	123	126	8	1.3	40	33	4	7	2	13	11	32766	10230	10286	10185	-10	16	-25	91	46	8	11	19	27	43	11	61	10	0	-12	69	-27
2015-03-01	70	good	45	90	12	0.9	39	76	4	6	2	12	42	32766	10170	10216	10124	43	124	-37	33	12	0	0	0	26	64	10	104	11	99	35	227	-71
2015-03-02	73	good	53	82	17	1.4	44	74	7	8	2	17	36	32766	10079	10135	10041	61	147	-30	33	10	0	0	0	22	59	16	109	16	88	69	287	-61
2015-03-03	48	perfect	8	48	2	0.3	10	76	7	13	1	21	75	32766	10196	10231	10079	25	98	-13	11	9	0	0	0	54	88	16	165	1	105	59	235	-31
2015-03-04	41	perfect	24	41	12	0.6	31	73	4	10	12	26	36	32766	10246	10272	10220	10	63	-73	17	8	0	0	0	17	48	1	92	1	105	25	262	-103
2015-03-05	144	mild pollution	110	129	47	1.6	59	65	4	7	3	14	39	32766	10222	10249	10183	23	83	-46	23	14	0	0	0	30	61	11	100	11	96	24	215	-87
2015-03-06	245	severe pollution	195	217	59	2.1	82	57	3	15	4	22	30	32766	10154	10196	10114	32	101	-32	39	22	0	0	0	16	40	9	61	10	76	41	244	-67
2015-03-07	281	severe pollution	231	246	41	2.4	83	92	3	14	2	19	35	32766	10146	10170	10124	59	125	-6	53	32	0	0	0	17	33	10	56	10	80	65	298	-54
2015-03-08	169	moderate pollution	129	148	22	1.4	53	79	6	13	4	23	45	32766	10178	10224	10139	60	121	20	53	11	0	0	0	22	60	16	107	16	58	56	240	-23
2015-03-09	40	perfect	7	28	3	0.3	14	79	5	13	4	22	58	32766	10316	10344	10224	13	64	-23	11	6	0	0	0	37	73	1	133	3	107	49	265	-55
2015-03-10	45	perfect	30	45	13	0.8	39	78	7	11	3	21	40	32766	10270	10336	10202	25	83	-62	15	6	0	0	0	20	48	10	118	12	101	52	295	-108
2015-03-11	52	good	37	52	13	1	46	75	8	9	4	21	44	32766	10195	10230	10158	43	110	-40	22	9	0	0	0	16	42	3	71	4	107	67	330	-95
2015-03-12	83	good	61	79	21	1.2	60	60	3	7	3	13	44	32766	10128	10169	10096	58	130	-20	27	11	0	0	0	20	40	4	67	4	88	80	321	-74
2015-03-13	86	good	64	82	21	1.3	60	80	7	8	4	19	54	32766	10177	10198	10121	54	134	-27	36	7	0	0	0	14	46	3	75	3	98	77	343	-78
2015-03-14	127	mild pollution	97	119	40	1.9	83	42	9	9	3	21	33	32766	10173	10226	10111	49	119	5	52	14	0	0	0	28	38	6	60	6	52	81	285	-26
2015-03-15	135	mild pollution	103	198	26	1.7	73	93	9	10	4	23	59	32766	10132	10162	10099	94	172	2	33	8	0	0	0	18	60	11	96	10	97	103	359	-65
2015-03-16	257	severe pollution	207	295	33	2	85	67	6	12	5	23	39	32766	10080	10114	10055	108	146	66	58	19	0	0	0	19	36	9	59	8	0	124	289	32
2015-03-17	233	severe pollution	183	222	16	1.7	57	102	10	17	5	32	51	32766	10153	10182	10083	108	159	68	58	24	0	0	0	23	44	10	66	12	64	134	360	7
2015-03-18	69	good	47	89	12	0.8	50	82	10	15	3	28	55	32766	10126	10180	10082	91	135	56	29	17	0	0	0	17	54	10	74	10	44	104	311	15
2015-03-19	127	mild pollution	81	203	11	1.1	69	72	9	13	2	24	51	32766	10129	10154	10096	115	196	26	30	11	0	0	0	15	46	11	76	10	73	127	393	-28
2015-03-20	124	mild pollution	44	199	6	0.5	46	98	5	14	4	23	72	32766	10137	10167	10100	141	201	73	18	7	0	0	0	15	52	16	97	1	101	150	406	-5
2015-03-21	77	good	19	103	4	0.3	28	87	8	11	3	22	104	32766	10142	10167	10109	155	192	100	8	5	0	0	0	32	63	15	123	15	112	166	403	-1
2015-03-22	77	good	20	104	4	0.3	21	87	7	9	2	18	82	32766	10234	10271	10148	104	161	63	16	6	0	0	0	37	67	4	112	4	66	152	400	13
2015-03-23	67	good	34	84	7	0.7	43	89	8	9	0	17	68	32766	10251	10274	10221	96	188	-8	27	6	0	0	0	21	50	11	76	9	108	135	441	-69
2015-03-24	102	mild pollution	77	122	29	1.8	68	88	8	13	2	23	61	32766	10273	10306	10237	96	167	30	31	13	0	0	0	30	49	4	72	4	109	140	410	-16
2015-03-25	161	moderate pollution	123	158	41	1.8	79	107	8	12	4	24	54	32766	10266	10287	10242	110	188	36	46	29	0	0	0	24	49	11	76	9	90	136	385	-17
2015-03-26	138	mild pollution	105	155	21	1	56	138	7	12	1	20	79	32766	10248	10268	10217	143	209	67	36	13	0	0	0	31	66	10	103	10	86	160	390	5
2015-03-27	138	mild pollution	83	115	18	0.8	55	128	7	12	1	20	71	32766	10169	10230	10114	143	204	76	41	30	0	0	0	29	53	10	83	11	88	173	394	14
2015-03-28	163	moderate pollution	64	277	8	0.5	33	109	9	9	2	20	95	32766	10091	10118	10073	184	238	99	31	19	0	0	0	39	65	16	135	16	112	197	365	45
2015-03-29	166	moderate pollution	75	282	17	1.1	67	111	7	13	4	24	70	32766	10104	10139	10064	169	238	85	34	19	0	0	0	21	62	11	108	10	58	176	415	29
2015-03-30	197	moderate pollution	148	338	29	1.4	63	129	10	11	5	26	63	32766	10049	10071	10021	182	226	136	46	25	0	0	0	28	47	9	77	9	36	198	389	93
2015-03-31	202	severe pollution	152	191	21	2.3	54	107	4	9	2	15	7	32766	10107	10165	10039	120	201	101	75	49	10	67	77	22	51	4	76	4	0	115	179	84
2015-04-01	80	good	59	78	5	0.7	49	79	6	7	1	14	32766	21	10167	10204	10118	99	131	62	57	22	0	0	0	15	32	5	61	8	0	97	177	26
2015-04-02	50	perfect	35	19	4	0.7	26	88	6	11	3	20	32766	18	9994	10120	9929	86	152	44	75	33	167	4	171	21	38	2	64	1	50	111	248	48
2015-04-03	62	good	28	40	4	0.6	27	114	6	12	4	22	32766	37	10079	10102	9972	121	162	68	53	32	0	0	0	21	42	9	72	9	100	146	341	19
2015-04-04	84	good	62	75	5	0.6	36	134	3	9	2	14	32766	30	10087	10110	10067	116	167	74	56	37	0	0	0	18	45	10	74	11	50	147	331	52
2015-04-05	74	good	53	99	3	0.5	30	104	7	6	3	16	32766	59	10137	10190	10092	132	173	106	31	13	0	0	0	45	73	16	132	1	90	157	342	77
2015-04-06	38	perfect	20	32	2	0.3	14	76	4	6	4	14	32766	62	10261	10295	10190	74	117	45	24	15	0	0	0	39	72	1	127	1	100	126	329	26
2015-04-07	45	perfect	23	39	4	0.3	23	89	6	11	3	20	32766	45	10274	10310	10231	79	130	29	28	12	0	0	0	25	46	12	79	9	115	135	382	-17
2015-04-08	126	mild pollution	96	123	12	0.8	49	99	3	6	2	11	32766	34	10207	10247	10168	87	134	38	52	24	0	0	0	33	59	11	95	11	90	127	325	-1
2015-04-09	212	severe pollution	162	190	17	1.2	59	120	3	8	0	11	32766	30	10163	10185	10137	112	180	43	58	37	0	0	0	23	61	11	90	11	87	145	359	11
2015-04-10	200	moderate pollution	150	186	9	1.1	62	126	3	8	1	12	32766	28	10152	10179	10122	137	215	65	60	24	0	0	0	22	49	11	82	10	60	171	416	23
2015-04-11	188	moderate pollution	141	77	16	1.7	46	130	3	9	2	14	32766	29	10157	10168	10133	142	187	106	65	35	0	5	5	30	50	7	92	7	67	193	404	84
2015-04-12	44	perfect	12	26	2	0.3	12	87	2	5	1	8	32766	54	10212	10256	10167	79	130	61	56	30	157	0	157	59	92	3	154	2	30	82	191	40
2015-04-13	67	good	26	39	3	0.4	22	120	5	8	1	14	32766	47	10212	10268	10144	110	184	44	46	24	3	0	3	31	67	2	138	2	102	144	346	23
2015-04-14	74	good	54	84	5	0.7	54	114	6	8	1	15	32766	39	10046	10145	9991	157	258	45	46	16	0	0	0	19	53	12	81	11	114	184	415	15
2015-04-15	168	moderate pollution	109	286	14	0.9	70	101	2	7	3	12	32766	33	9961	9997	9902	177	254	93	42	23	0	0	0	25	74	15	174	15	37	198	370	59
2015-04-16	91	good	26	132	3	0.2	13	95	4	5	1	10	32766	100	10076	10112	9984	163	212	127	13	7	0	0	0	46	90	16	190	16	113	202	398	76
2015-04-17	112	mild pollution	67	173	16	0.7	55	100	2	5	4	11	32766	49	10049	10072	10024	172	257	91	32	16	0	0	0	27	51	10	82	10	101	204	440	49
2015-04-18	182	moderate pollution	138	273	27	1.5	89	99	3	8	3	14	32766	20	10069	10082	10043	180	218	141	53	30	0	0	0	17	36	4	57	4	14	181	352	113
2015-04-19	91	good	60	133	6	0.6	30	100	5	8	2	15	32766	48	10105	10123	10081	168	215	137	43	8	0	0	0	36	66	11	114	3	23	196	377	110
2015-04-20	90	good	67	112	7	0.8	43	127	2	10	2	14	32766	48	10109	10136	10069	154	223	63	55	12	0	0	0	30	62	11	97	11	110	208	464	29
2015-04-21	90	good	63	129	8	0.6	44	111	1	9	4	14	32766	55	10062	10088	10021	191	274	105	35	5	0	0	0	26	69	15	138	15	90	193	499	62
2015-04-22	84	good	43	100	8	0.6	49	141	3	9	3	15	32766	63	10131	10159	10088	188	256	85	36	15	0	0	0	32	73	10	116	10	116	232	476	44
2015-04-23	79	good	54	108	11	0.6	49	115	2	8	2	12	32766	50	10104	10139	10077	210	287	129	33	5	0	0	0	22	57	1	112	1	65	246	488	89
2015-04-24	103	mild pollution	52	155	7	0.6	47	139	1	7	2	10	32766	65	10167	10200	10125	191	259	87	37	5	0	0	0	25	62	11	103	11	121	241	495	54
2015-04-25	115	mild pollution	72	158	12	0.8	64	177	0	4	2	6	32766	53	10106	10136	10064	225	317	106	36	14	0	0	0	23	51	10	84	11	116	279	549	69
2015-04-26	161	moderate pollution	98	182	20	1	53	226	2	4	1	7	32766	53	10058	10083	10024	241	309	158	49	24	0	0	0	34	64	11	94	10	107	291	524	117
2015-04-27	114	mild pollution	81	134	12	0.9	46	175	2	4	7	13	32766	41	10011	10043	9969	223	283	175	56	35	0	9	9	13	66	11	109	11	77	256	493	142
2015-04-28	78	good	43	68	5	0.7	39	134	2	9	3	14	32766	36	10064	10086	9992	204	251	167	56	37	0	0	0	17	44	5	82	5	53	231	439	141
2015-04-29	150	mild pollution	115	136	11	1.3	48	196	4	8	2	14	32766	37	10091	10115	10059	206	268	136	65	47	0	0	0	24	53	11	82	10	88	271	506	112
2015-04-30	149	mild pollution	114	146	11	1.1	43	209	2	7	3	12	32766	42	10068	10089	10039	234	296	164	58	32	0	0	0	25	52	10	76	10	93	290	513	138
2015-05-01	165	moderate pollution	125	141	13	1.1	45	171	3	7	4	14	32766	34	10055	10069	10034	187	265	146	73	44	0	67	67	27	78	16	149	15	29	223	450	150
2015-05-02	88	good	45	68	3	0.6	30	145	1	6	2	9	32766	31	10060	10081	10032	192	242	140	67	47	25	0	25	22	52	9	87	9	96	247	433	125
2015-05-03	72	good	40	94	2	0.4	24	113	1	4	2	7	32766	87	10093	10114	10037	196	238	153	31	9	0	0	0	38	88	16	195	16	114	221	452	113
2015-05-04	66	good	23	65	4	0.3	20	119	4	8	2	14	32766	82	10113	10157	10054	185	232	135	19	11	0	0	0	38	65	11	109	11	124	241	466	81
2015-05-05	72	good	43	94	7	0.5	37	114	5	9	3	17	32766	55	10013	10060	9987	202	276	121	33	8	0	0	0	23	53	16	97	15	63	251	479	91
2015-05-06	60	good	19	70	3	0.3	24	100	6	9	3	18	32766	78	10072	10088	10016	187	238	149	15	9	0	0	0	21	51	9	88	1	54	224	492	107
2015-05-07	89	good	42	129	6	0.6	37	119	5	7	3	15	32766	51	10072	10088	10049	182	240	97	38	16	0	0	0	29	54	10	84	11	115	262	510	76
2015-05-08	83	good	52	115	11	1	37	119	4	5	1	10	32766	48	10056	10081	10028	185	239	140	47	28	0	0	0	16	49	6	91	4	107	260	481	110
2015-05-09	55	good	39	52	7	1	33	100	5	7	3	15	32766	34	10137	10148	10076	131	185	119	54	39	0	0	0	21	55	5	101	7	0	149	265	97
2015-05-10	49	perfect	34	35	4	1.3	46	46	4	5	1	10	32766	15	10118	10143	10095	108	129	85	75	48	0	246	246	16	39	5	60	4	0	114	131	95
2015-05-11	42	perfect	24	20	2	0.8	30	84	4	4	2	10	32766	28	10039	10113	9982	132	187	91	65	34	2	0	2	29	57	13	94	13	52	131	302	79
2015-05-12	54	good	19	44	2	0.5	41	105	3	6	1	10	32766	40	9917	9983	9879	183	277	108	44	19	0	0	0	23	50	16	109	14	101	181	442	82
2015-05-13	98	good	57	133	4	0.8	66	158	2	6	2	10	32766	30	9904	9918	9877	220	324	119	48	23	0	0	0	14	44	11	73	11	102	257	490	86
2015-05-14	57	good	20	62	5	0.3	29	108	4	8	4	16	32766	70	10026	10055	9918	221	283	188	27	14	0	0	0	26	58	16	121	16	64	249	427	140
2015-05-15	67	good	23	47	3	0.4	26	120	4	8	3	15	32766	59	10103	10141	10042	211	247	190	31	20	0	0	0	34	54	11	94	3	74	249	491	146
2015-05-16	116	mild pollution	46	96	8	0.7	43	178	2	7	3	12	32766	55	10059	10101	10010	219	290	109	43	17	0	0	0	27	61	11	100	10	128	273	526	85
2015-05-17	166	moderate pollution	126	182	15	1.2	43	165	4	6	3	13	32766	34	9952	10015	9902	228	282	183	64	46	0	1	1	28	44	11	75	10	71	243	507	161
2015-05-18	75	good	55	93	3	0.5	33	105	3	5	2	10	32766	81	9974	9996	9923	238	280	192	35	11	1	0	1	36	72	16	139	14	123	290	526	161
2015-05-19	49	perfect	11	49	2	0.3	16	93	0	3	2	5	32766	108	10036	10063	9980	234	268	187	14	7	0	0	0	39	81	2	156	16	131	295	520	121
2015-05-20	63	good	16	37	2	0.3	22	116	1	2	2	5	32766	83	10110	10140	10063	240	297	185	23	14	0	0	0	38	56	11	145	14	132	305	553	135
2015-05-21	91	good	33	84	6	0.5	43	149	0	7	2	9	32766	72	10080	10104	10050	230	285	171	33	22	0	0	0	42	81	10	122	10	106	273	537	137
2015-05-22	137	mild pollution	52	89	12	0.8	41	201	2	5	1	8	32766	56	10056	10078	10025	224	296	149	41	27	0	0	0	19	55	11	86	11	126	301	574	117
2015-05-23	179	moderate pollution	95	139	16	1	53	244	1	3	1	5	32766	49	10041	10058	10018	245	311	163	46	25	0	0	0	18	49	10	81	11	124	312	558	138
2015-05-24	178	moderate pollution	115	164	16	1.2	56	243	1	6	3	10	32766	53	10025	10043	10000	259	321	191	47	23	0	0	0	23	56	12	90	11	98	320	561	158
2015-05-25	203	severe pollution	101	166	24	1.2	47	281	2	5	2	9	32766	65	10016	10034	9999	270	332	203	44	28	0	0	0	30	62	11	98	9	105	330	565	170
2015-05-26	191	moderate pollution	87	149	19	0.9	38	256	0	5	3	8	32766	75	10018	10037	9993	272	335	204	45	24	0	0	0	35	67	10	106	10	124	339	569	169
2015-05-27	160	moderate pollution	92	141	11	0.9	33	225	1	4	2	7	32766	59	10009	10028	9984	261	316	210	50	29	0	0	0	18	39	10	71	9	110	336	570	179
2015-05-28	151	moderate pollution	116	151	23	1.2	36	197	1	6	3	10	32766	56	9999	10007	9986	257	295	219	55	41	0	0	0	23	50	10	82	9	19	310	477	201
2015-05-29	104	mild pollution	61	94	5	0.8	42	164	4	8	3	15	32766	43	10015	10028	9997	247	298	200	56	35	8	0	8	15	44	10	71	9	51	290	552	199
2015-05-30	136	mild pollution	54	90	6	0.8	39	200	4	4	2	10	32766	58	10033	10060	10003	249	303	178	53	18	0	0	0	23	54	10	109	11	96	326	581	138
2015-05-31	153	moderate pollution	55	102	15	0.9	44	218	2	7	0	9	32766	64	9972	10017	9929	270	332	195	47	30	0	0	0	27	73	10	123	11	124	350	594	162
2015-06-01	159	moderate pollution	88	166	14	1	46	224	5	7	2	14	32766	28	9961	9976	9944	281	331	230	51	23	0	0	0	14	50	11	96	12	43	333	529	209
2015-06-02	103	mild pollution	30	63	4	0.5	26	163	3	7	2	12	32766	94	10039	10055	9969	273	332	214	28	6	0	0	0	38	79	16	150	1	126	349	611	190
2015-06-03	75	good	32	101	6	0.5	36	128	3	6	2	11	32766	75	10089	10115	10053	255	318	173	37	11	0	0	0	24	55	10	90	10	95	334	611	141
2015-06-04	70	good	51	90	7	3.4	55	96	4	6	2	12	32766	28	10008	10063	9968	212	274	177	64	20	0	45	45	18	43	11	70	10	12	209	269	185
2015-06-05	68	good	49	52	5	6.8	45	65	4	5	3	12	32766	41	9944	9974	9914	242	323	154	54	26	0	0	0	23	47	3	100	1	118	308	552	130
2015-06-06	79	good	25	62	3	5	32	135	3	4	2	9	32766	61	9975	10000	9942	240	292	210	54	29	0	7	7	29	50	2	88	3	78	293	590	185
2015-06-07	43	perfect	14	32	4	2.6	30	86	5	7	3	15	32766	44	10042	10063	9999	223	295	152	48	14	0	1	1	14	56	10	91	10	75	247	593	118
2015-06-08	69	good	18	35	4	0.5	35	123	3	5	1	9	32766	49	10008	10044	9977	233	311	146	50	19	0	3	3	18	42	11	109	10	125	315	605	110
2015-06-09	134	mild pollution	49	87	15	1.1	49	197	3	6	3	12	32766	53	9977	9994	9949	246	295	197	51	37	0	0	0	26	59	5	92	4	68	306	512	162
2015-06-10	100	good	75	74	4	1.1	34	154	3	4	2	9	32766	23	9961	10011	9931	216	264	186	77	50	41	40	81	26	62	6	101	6	0	231	322	180
2015-06-11	48	perfect	20	25	3	0.6	21	96	3	4	2	9	32766	68	9938	9955	9926	231	294	164	53	25	47	0	47	31	67	15	134	16	94	273	464	159
2015-06-12	44	perfect	8	22	3	0.4	22	87	3	8	4	15	32766	66	9937	9946	9925	244	290	179	42	27	0	0	0	28	67	14	118	12	111	278	506	145
2015-06-13	65	good	11	27	3	0.4	18	118	3	7	2	12	32766	54	10001	10029	9938	240	283	190	56	35	4	0	4	35	50	2	98	2	81	282	539	183
2015-06-14	98	good	19	37	3	0.5	29	158	4	7	1	12	32766	59	10042	10056	10020	259	327	182	51	28	0	0	0	25	51	6	79	6	123	343	592	164
2015-06-15	166	moderate pollution	85	121	15	1.2	40	231	4	7	2	13	32766	53	10029	10049	9998	265	321	215	53	33	0	0	0	15	56	10	99	10	75	328	518	197
2015-06-16	177	moderate pollution	104	144	12	1.2	50	242	5	3	2	10	32766	58	9997	10012	9970	269	339	222	52	27	0	0	0	26	48	11	108	1	90	344	562	194
2015-06-17	126	mild pollution	42	67	3	0.8	36	189	5	3	2	10	32766	36	9983	9996	9964	272	344	212	56	25	0	121	121	17	96	2	179	2	97	342	630	208
2015-06-18	53	good	19	32	2	0.5	28	103	5	5	3	13	32766	72	10022	10044	9988	275	330	191	36	15	0	0	0	22	45	16	96	15	114	312	515	168
2015-06-19	35	perfect	14	33	2	0.5	24	70	6	7	1	14	32766	57	10055	10078	10005	216	299	170	59	19	11	15	26	23	57	1	98	3	65	258	436	170
2015-06-20	103	mild pollution	23	39	2	0.6	37	163	5	11	1	17	32766	50	10076	10095	10056	246	310	176	52	32	0	0	0	17	37	3	59	2	134	319	557	151
2015-06-21	137	mild pollution	41	73	5	0.6	39	201	5	7	2	14	32766	58	10043	10062	10014	271	321	209	44	27	0	0	0	19	45	11	79	11	112	328	570	190
2015-06-22	163	moderate pollution	90	117	16	1.1	38	228	4	11	4	19	32766	59	10018	10032	10003	261	315	214	54	33	0	0	0	20	43	10	71	10	35	315	565	194
2015-06-23	231	severe pollution	181	178	15	1.7	39	238	4	11	4	19	32766	45	10029	10045	10012	265	320	218	64	38	3	0	3	23	46	10	72	10	0	309	498	206
2015-06-24	159	moderate pollution	121	123	9	1.1	43	190	3	6	4	13	32766	39	10017	10027	9998	251	293	240	64	47	0	0	0	23	49	11	71	11	0	256	339	230
2015-06-25	164	moderate pollution	125	111	6	1	51	128	5	8	2	15	32766	26	9977	10008	9950	249	279	229	68	53	0	0	0	17	36	6	50	5	2	277	412	219
2015-06-26	139	mild pollution	106	23	2	0.9	24	200	4	5	2	11	32766	29	9967	9977	9949	243	294	206	81	50	71	0	71	19	36	4	54	4	51	272	396	210
2015-06-27	120	mild pollution	89	51	4	0.8	32	182	1	1	0	2	32766	30	10008	10019	9971	252	298	215	76	58	0	0	0	18	34	10	62	1	0	285	445	203
2015-06-28	197	moderate pollution	148	57	8	1.2	34	219	2	7	3	12	32766	43	10022	10042	9992	275	328	233	70	46	0	0	0	25	34	6	60	5	5	334	520	224
2015-06-29	154	moderate pollution	118	39	5	1.1	42	178	2	4	3	9	32766	41	10013	10049	9987	229	289	193	82	58	0	1	1	21	66	4	98	4	0	243	343	209
2015-06-30	52	good	15	20	2	0.4	27	102	3	5	2	10	32766	44	9993	10052	9933	223	273	184	60	36	8	4	12	26	53	11	90	10	80	277	489	184
2015-07-01	41	perfect	18	38	3	0.4	34	82	2	6	2	10	32766	48	9937	9959	9912	255	345	174	53	21	0	11	11	18	83	1	154	1	106	321	604	153
2015-07-02	46	perfect	8	20	4	0.3	28	92	5	9	5	19	32766	79	9983	9995	9958	280	344	176	30	14	0	0	0	29	57	14	135	14	129	330	615	146
2015-07-03	116	mild pollution	24	60	11	0.9	34	178	3	7	2	12	32766	75	10041	10062	9984	259	314	180	41	19	0	0	0	25	44	9	76	4	136	350	601	157
2015-07-04	92	good	33	59	6	0.7	45	150	4	7	2	13	32766	50	10058	10075	10038	228	266	196	54	33	0	13	13	12	46	8	82	9	16	272	421	176
2015-07-05	160	moderate pollution	62	71	9	1	36	225	3	4	3	10	32766	43	10060	10072	10036	238	299	177	63	37	0	0	0	19	37	4	72	6	89	304	539	156
2015-07-06	156	moderate pollution	69	76	10	1.1	33	221	3	4	2	9	32766	54	10064	10079	10040	258	312	203	55	34	0	0	0	21	32	12	53	7	105	344	591	191
2015-07-07	160	moderate pollution	67	86	7	0.9	32	225	4	5	1	10	32766	61	10051	10069	10026	273	328	207	53	35	0	0	0	24	35	10	61	7	119	364	613	196
2015-07-08	175	moderate pollution	125	132	8	1.1	35	240	4	8	2	14	32766	61	10061	10076	10035	277	334	221	58	39	0	0	0	22	39	10	65	10	92	353	573	213
2015-07-09	172	moderate pollution	72	92	11	0.8	37	237	2	8	4	14	32766	81	10085	10105	10060	280	339	230	50	32	0	0	0	25	40	7	70	5	101	363	602	216
2015-07-10	145	mild pollution	50	82	9	0.7	32	210	4	8	2	14	32766	76	10067	10091	10034	280	332	229	55	32	0	0	0	23	40	10	70	9	111	363	601	229
2015-07-11	181	moderate pollution	103	126	10	1.1	35	246	2	4	2	8	32766	66	10033	10059	9999	290	344	239	57	37	0	0	0	17	39	6	75	9	92	361	581	231
2015-07-12	200	moderate pollution	108	158	5	0.9	46	267	2	4	4	10	32766	67	9961	10012	9914	307	387	243	54	24	0	0	0	18	64	4	117	1	96	386	630	224
2015-07-13	176	moderate pollution	49	84	3	0.6	43	241	4	10	4	18	32766	85	9937	9953	9922	326	389	263	43	21	0	0	0	17	39	10	63	8	113	401	691	242
2015-07-14	147	mild pollution	35	65	4	0.6	30	212	5	8	3	16	32766	81	9991	10008	9938	298	347	246	46	32	2	1	3	26	61	16	128	14	66	355	552	232
2015-07-15	85	good	34	62	3	0.6	47	142	6	9	3	18	32766	55	10014	10028	9989	283	306	259	47	35	0	0	0	17	34	15	63	1	0	295	390	238
2015-07-16	54	good	37	47	2	0.7	29	105	4	8	3	15	32766	36	10035	10046	10020	232	286	212	78	49	83	0	83	28	44	1	77	1	2	226	306	213
2015-07-17	50	perfect	35	43	2	0.8	32	91	2	4	2	8	32766	28	10032	10047	10016	237	270	210	78	60	0	57	57	27	38	3	58	4	27	247	342	207
2015-07-18	78	good	47	30	2	0.8	26	134	1	4	1	6	32766	26	10022	10035	10011	236	286	208	81	59	221	7	228	19	59	8	106	8	40	264	372	210
2015-07-19	89	good	66	33	2	0.9	32	124	5	5	3	13	32766	25	10036	10048	10024	238	293	213	88	59	310	3	313	11	57	6	104	7	14	264	378	212
2015-07-20	118	mild pollution	89	144	2	0.9	33	142	5	4	2	11	32766	25	10033	10054	10013	256	300	226	81	57	8	0	8	15	26	9	39	9	37	276	370	221
2015-07-21	176	moderate pollution	133	0	2	1.1	33	151	2	5	3	10	32766	30	10015	10030	9985	255	301	231	83	60	0	0	0	20	71	11	106	10	0	269	388	224
2015-07-22	110	mild pollution	62	55	2	0.7	35	171	0	4	4	8	32766	35	10003	10020	9980	264	313	212	70	48	0	0	0	17	51	10	79	9	90	313	499	201
2015-07-23	70	good	41	54	2	0.8	48	123	1	4	3	8	32766	26	10000	10018	9979	260	313	218	74	55	39	0	39	11	47	15	107	15	40	290	446	212
2015-07-24	138	mild pollution	50	77	2	0.9	46	201	3	5	3	11	32766	39	9975	9994	9959	271	329	235	68	36	0	0	0	15	42	9	70	9	63	306	489	218
2015-07-25	158	moderate pollution	90	108	3	1	38	223	2	4	3	9	32766	43	9968	9981	9951	280	332	227	68	48	0	0	0	20	46	11	75	11	115	334	541	213
2015-07-26	151	moderate pollution	104	123	4	1	33	216	3	3	2	8	32766	43	9990	10002	9955	301	352	240	64	42	0	0	0	10	32	11	57	9	78	354	560	229
2015-07-27	130	mild pollution	75	133	3	0.9	33	192	4	5	3	12	32766	43	10001	10021	9974	294	336	239	69	57	0	0	0	22	52	9	100	9	82	359	544	238
2015-07-28	109	mild pollution	52	76	2	0.8	30	169	4	5	2	11	32766	29	9989	10018	9967	268	318	234	82	56	288	0	288	14	53	1	101	2	55	274	376	234
2015-07-29	138	mild pollution	86	55	2	0.9	35	201	3	4	2	9	32766	22	9970	9995	9942	290	322	256	76	64	0	0	0	13	42	9	79	10	29	294	363	242
2015-07-30	75	good	44	52	2	0.9	28	129	0	6	4	10	32766	36	10000	10021	9962	247	302	227	85	60	12	15	27	21	87	10	139	10	8	248	363	220
2015-07-31	85	good	26	41	2	0.7	26	142	3	5	2	10	32766	37	10035	10046	10019	254	297	223	77	55	4	0	4	22	36	3	61	4	48	275	403	217
2015-08-01	90	good	67	72	3	1.3	47	100	4	3	2	9	32766	17	10030	10041	10000	255	271	245	80	68	0	0	0	11	25	13	40	6	0	253	297	233
2015-08-02	102	mild pollution	74	88	2	1.2	27	162	3	5	2	10	32766	13	9987	10026	9961	260	305	230	89	68	328	0	328	9	39	14	68	15	48	279	394	229
2015-08-03	82	good	60	33	4	1.1	33	101	3	7	2	12	32766	35	9978	9997	9962	263	300	234	78	41	0	2	2	16	58	1	121	15	0	253	358	203
2015-08-04	110	mild pollution	21	54	4	0.5	32	171	4	6	2	12	32766	49	9972	9982	9955	263	330	187	57	37	0	0	0	17	43	10	61	9	129	290	456	156
2015-08-05	127	mild pollution	64	102	3	1	40	189	5	5	2	12	32766	33	9986	9994	9969	275	317	229	73	49	0	0	0	17	36	10	55	9	106	302	481	212
2015-08-06	119	mild pollution	58	95	2	0.8	31	180	5	4	2	11	32766	46	10026	10039	9989	263	309	220	67	52	0	0	0	16	42	3	75	2	50	305	484	209
2015-08-07	119	mild pollution	90	0	4	1.1	33	167	5	3	5	13	32766	31	10083	10109	10039	253	313	205	82	59	0	32	32	24	77	16	146	1	24	284	490	211
2015-08-08	110	mild pollution	40	72	3	0.7	34	171	4	3	4	11	32766	41	10090	10116	10066	254	312	202	76	47	54	0	54	19	40	16	56	10	112	285	425	191
2015-08-09	152	moderate pollution	53	85	3	0.8	37	217	6	9	6	21	32766	36	10067	10081	10044	283	339	232	69	46	0	0	0	13	33	9	51	9	114	336	560	214
2015-08-10	112	mild pollution	42	80	2	0.7	38	173	5	7	5	17	32766	53	10054	10072	10033	296	354	247	60	31	0	0	0	20	34	5	51	3	116	359	599	226
2015-08-11	175	moderate pollution	91	128	6	1.4	36	240	7	9	3	19	32766	54	10046	10063	10022	294	344	256	67	39	0	0	0	13	35	11	65	11	101	371	612	244
2015-08-12	161	moderate pollution	81	129	4	1	36	226	5	3	2	10	32766	61	10023	10039	9999	297	355	241	63	35	0	0	0	25	51	11	81	10	114	360	586	224
2015-08-13	202	severe pollution	120	160	7	1.3	41	275	5	7	6	18	32766	55	9999	10020	9973	294	346	240	62	41	0	0	0	25	48	10	75	9	106	353	568	226
2015-08-14	119	mild pollution	58	95	4	0.8	35	180	5	9	7	21	32766	64	9992	9997	9978	291	326	254	52	26	0	0	0	20	41	1	74	2	70	314	498	235
2015-08-15	80	good	22	54	3	0.6	36	135	4	6	3	13	32766	64	10010	10027	9993	287	354	221	49	20	0	0	0	15	46	2	86	1	127	355	597	191
2015-08-16	201	severe pollution	38	89	6	0.7	40	270	4	9	5	18	32766	59	10014	10027	9998	286	349	224	53	35	0	0	0	16	45	11	67	11	119	356	610	202
2015-08-17	145	mild pollution	80	161	8	1	40	209	5	9	5	19	32766	51	10020	10033	10008	286	338	236	58	33	0	0	0	21	45	5	76	7	73	334	547	219
2015-08-18	90	good	48	82	3	0.8	34	147	3	6	5	14	32766	48	10059	10084	10029	262	296	240	64	40	3	0	3	20	52	10	88	11	30	295	542	242
2015-08-19	97	good	51	65	2	0.8	38	156	4	4	4	12	32766	39	10071	10091	10051	254	294	221	68	49	8	1	9	24	39	7	72	8	55	302	505	215
2015-08-20	100	good	33	51	2	0.6	26	160	5	6	4	15	32766	49	10041	10071	10009	266	336	205	60	26	0	0	0	17	43	10	65	11	111	344	597	193
2015-08-21	94	good	14	37	2	0.4	25	152	4	3	4	11	32766	68	10018	10039	9990	284	334	215	40	26	0	0	0	20	42	10	72	12	121	351	603	182
2015-08-22	56	good	17	38	4	0.6	20	107	4	5	5	14	32766	68	10014	10027	9991	275	328	220	50	31	0	0	0	23	57	4	87	3	123	356	598	194
2015-08-23	53	good	21	33	4	0.8	23	103	5	5	5	15	32766	42	10053	10066	10024	242	286	217	68	50	0	16	16	16	44	4	79	5	43	266	558	209
2015-08-24	55	good	13	28	2	0.5	22	106	4	6	4	14	32766	38	10071	10086	10052	248	297	206	64	42	0	0	0	16	46	4	69	4	88	302	560	184
2015-08-25	50	perfect	14	27	2	0.5	23	99	4	7	4	15	32766	48	10063	10080	10039	259	315	221	58	35	0	0	0	15	40	5	65	4	74	320	598	204
2015-08-26	61	good	12	27	2	0.4	23	113	6	7	3	16	32766	51	10054	10072	10028	264	322	216	55	33	0	0	0	15	37	14	65	2	97	333	595	195
2015-08-27	60	good	12	26	2	0.4	25	111	2	4	3	9	32766	55	10054	10072	10031	269	319	220	53	32	0	0	0	18	38	13	54	3	110	343	601	196
2015-08-28	70	good	16	38	3	0.5	24	124	4	7	4	15	32766	60	10038	10054	10006	261	336	210	57	26	0	0	0	22	67	8	114	7	115	345	606	192
2015-08-29	118	mild pollution	28	48	2	0.6	21	179	5	6	4	15	32766	58	10051	10061	10032	261	304	200	55	41	40	0	40	21	44	11	72	4	94	313	504	192
2015-08-30	74	good	28	32	2	0.9	25	128	3	5	4	12	32766	37	10077	10089	10048	218	269	193	81	52	3	256	259	24	46	9	78	9	12	237	392	196
2015-08-31	37	perfect	25	29	2	0.7	25	73	4	7	3	14	32766	17	10089	10099	10081	212	231	197	88	73	9	74	83	13	24	14	41	14	0	219	276	196
2015-09-01	34	perfect	11	20	2	0.5	20	67	6	7	3	16	32766	29	10090	10094	10080	202	238	187	90	67	58	22	80	16	44	2	97	2	0	202	248	183
2015-09-02	44	perfect	10	19	2	0.4	20	87	2	3	2	7	32766	37	10091	10103	10073	252	309	196	61	35	0	0	0	18	44	3	79	3	117	252	367	174
2015-09-03	74	good	15	30	2	0.5	19	128	3	6	4	13	32766	40	10100	10115	10084	260	316	197	62	39	0	0	0	16	37	3	61	2	117	294	473	174
2015-09-04	64	good	46	0	3	1.5	26	101	4	5	2	11	32766	29	10088	10101	10069	218	278	197	92	56	0	199	199	19	42	5	71	5	0	223	257	198
2015-09-05	44	perfect	18	20	2	0.7	23	88	3	6	1	10	32766	18	10071	10088	10052	181	198	170	94	74	245	27	272	24	43	4	77	5	0	186	209	179
2015-09-06	63	good	17	34	2	0.5	30	115	2	4	3	9	32766	28	10092	10109	10081	224	279	180	66	38	0	0	0	13	30	13	45	13	98	231	379	165
2015-09-07	84	good	25	44	3	0.7	38	140	2	8	3	13	32766	36	10094	10106	10082	229	290	164	68	41	0	0	0	13	35	10	63	11	113	236	361	145
2015-09-08	104	mild pollution	52	82	6	0.9	53	164	4	5	2	11	32766	33	10111	10118	10095	232	270	167	61	39	0	0	0	16	38	11	61	12	73	232	328	145
2015-09-09	50	perfect	32	50	3	0.7	40	94	4	6	2	12	32766	29	10151	10174	10118	223	254	207	66	53	0	0	0	17	46	3	74	2	0	208	275	185
2015-09-10	37	perfect	8	14	2	0.4	29	41	3	6	2	11	32766	29	10178	10194	10157	171	216	143	80	60	10	37	47	17	39	2	73	2	0	168	194	143
2015-09-11	35	perfect	9	16	2	0.4	26	69	3	4	1	8	32766	31	10124	10169	10093	170	236	137	73	41	3	63	66	20	62	2	128	1	75	185	320	130
2015-09-12	34	perfect	9	24	2	0.4	27	68	4	2	0	6	32766	62	10132	10160	10107	202	261	144	40	23	0	0	0	40	52	13	102	16	117	198	349	98
2015-09-13	57	good	20	51	3	0.6	45	105	3	2	3	8	32766	41	10122	10138	10104	218	296	131	54	24	0	0	0	16	44	10	72	13	116	212	371	101
2015-09-14	89	good	66	105	10	0.9	58	145	4	8	3	15	32766	35	10144	10160	10115	210	266	156	60	28	0	0	0	15	41	10	63	8	102	228	461	114
2015-09-15	140	mild pollution	105	134	13	1.2	62	204	4	5	1	10	32766	29	10158	10177	10137	202	264	149	66	36	0	0	0	11	23	9	42	5	67	241	464	122
2015-09-16	169	moderate pollution	128	152	8	1.2	62	180	2	5	3	10	32766	29	10143	10155	10125	210	266	149	69	42	0	0	0	17	39	11	65	11	82	244	439	126
2015-09-17	201	severe pollution	151	166	10	1.3	69	181	3	4	1	8	32766	23	10132	10147	10111	222	275	168	71	50	0	0	0	16	40	10	70	10	39	253	451	148
2015-09-18	102	mild pollution	76	77	3	0.9	49	110	2	3	4	9	32766	36	10125	10142	10107	241	302	203	64	24	6	0	6	15	31	15	63	15	93	281	500	192
2015-09-19	69	good	23	51	3	0.6	55	95	6	3	3	12	32766	52	10130	10156	10103	229	287	164	48	26	0	0	0	13	36	3	57	2	112	270	512	130
2015-09-20	114	mild pollution	86	112	9	1	51	146	4	6	4	14	32766	41	10093	10115	10064	221	273	185	70	42	0	0	0	19	43	10	76	10	67	256	445	165
2015-09-21	133	mild pollution	101	134	17	1.3	67	176	4	6	3	13	32766	38	10075	10089	10055	227	278	168	57	40	0	0	0	17	41	9	69	9	89	259	453	144
2015-09-22	179	moderate pollution	135	0	10	1.5	60	108	3	3	1	7	32766	29	10058	10081	10037	219	260	185	71	53	0	0	0	22	54	10	79	10	4	236	400	170
2015-09-23	57	good	32	60	2	0.7	45	98	4	5	5	14	32766	34	10054	10071	10040	211	268	152	69	42	0	0	0	15	27	3	44	9	86	257	485	125
2015-09-24	124	mild pollution	94	102	4	1.2	53	121	4	6	3	13	32766	21	10056	10078	10028	211	257	191	77	58	0	0	0	17	38	4	62	4	21	252	412	180
2015-09-25	49	perfect	22	44	3	0.6	39	82	0	1	0	1	32766	58	10074	10083	10046	198	264	145	59	12	35	0	35	19	48	1	115	15	108	229	402	127
2015-09-26	74	good	34	72	7	0.7	48	128	3	6	3	12	32766	37	10094	10116	10076	199	273	127	51	33	0	0	0	21	59	11	94	11	104	216	413	97
2015-09-27	73	good	48	85	3	0.7	58	113	3	6	3	12	32766	37	10101	10117	10087	222	286	153	48	18	0	0	0	17	33	3	55	3	95	248	449	130
2015-09-28	68	good	49	62	4	1.3	46	59	3	3	2	8	32766	17	10188	10219	10109	182	239	170	77	38	4	4	8	15	40	3	57	3	0	182	217	161
2015-09-29	62	good	44	0	3	1.1	45	20	3	4	2	9	32766	14	10247	10272	10218	156	175	140	89	73	16	76	92	16	30	4	46	4	0	156	187	139
2015-09-30	48	perfect	30	0	3	0.7	38	48	5	4	1	10	32766	28	10160	10249	10101	156	197	137	88	60	21	46	67	16	32	12	56	10	26	167	306	136
2015-10-01	33	perfect	14	29	2	0.3	25	65	1	3	1	5	32766	72	10087	10108	10059	170	223	142	50	22	30	0	30	28	74	16	160	16	110	173	297	88
2015-10-02	59	good	30	68	3	0.6	47	88	3	8	4	15	32766	35	10073	10096	10046	184	261	97	53	23	0	0	0	21	48	11	78	11	107	195	385	65
2015-10-03	62	good	28	69	4	0.7	49	85	4	5	4	13	32766	33	10157	10181	10071	187	247	111	54	33	0	0	0	19	46	11	74	11	102	199	395	78
2015-10-04	149	mild pollution	114	155	10	1.3	77	125	5	8	3	16	32766	21	10185	10209	10163	178	247	127	70	41	0	0	0	11	27	10	43	8	85	200	370	106
2015-10-05	272	severe pollution	222	244	9	1.7	80	180	4	5	3	12	32766	17	10147	10176	10119	188	244	138	77	52	0	0	0	14	30	9	47	10	61	201	364	111
2015-10-06	343	gross pollution	293	327	7	2	84	200	3	6	4	13	32766	18	10127	10150	10106	192	251	141	81	53	0	0	0	11	27	3	46	9	52	204	359	114
2015-10-07	310	gross pollution	260	83	8	1.8	76	128	4	3	1	8	32766	22	10104	10117	10083	207	254	169	78	57	0	0	0	16	34	11	56	8	19	213	354	151
2015-10-08	35	perfect	11	28	2	0.3	23	70	5	8	5	18	32766	77	10157	10188	10110	168	233	149	20	11	0	0	0	33	71	1	216	14	108	189	367	92
2015-10-09	39	perfect	16	39	3	0.4	29	64	3	9	4	16	32766	58	10076	10133	10042	141	206	81	35	17	0	0	0	35	83	16	164	1	105	156	351	37
2015-10-10	27	perfect	8	23	2	0.3	17	54	2	6	4	12	32766	64	10130	10148	10097	126	157	98	29	21	0	0	0	39	77	14	146	14	104	144	328	48
2015-10-11	37	perfect	10	25	2	0.3	21	73	1	5	3	9	32766	45	10135	10151	10112	175	221	130	28	22	0	0	0	28	71	16	130	1	98	180	368	71
2015-10-12	60	good	18	47	3	0.5	48	70	4	6	2	12	32766	42	10170	10192	10148	176	257	83	33	15	0	0	0	12	59	16	116	16	107	192	425	47
2015-10-13	84	good	35	73	6	0.8	67	68	1	5	2	8	32766	30	10161	10184	10137	179	274	82	43	15	0	0	0	12	37	2	64	1	108	195	434	48
2015-10-14	135	mild pollution	103	147	16	2	96	66	4	5	2	11	32766	21	10135	10150	10119	168	218	124	62	36	0	0	0	22	35	3	55	4	39	165	331	98
2015-10-15	143	mild pollution	109	147	9	1.4	91	123	6	7	2	15	32766	24	10130	10145	10114	180	253	108	63	33	0	0	0	16	31	11	58	10	90	185	384	79
2015-10-16	253	severe pollution	203	236	13	2.1	111	159	4	7	2	13	32766	16	10139	10158	10118	168	249	118	73	40	0	0	0	13	29	10	46	10	80	176	342	85
2015-10-17	344	gross pollution	294	0	13	2.5	119	97	4	7	4	15	32766	15	10132	10143	10116	165	224	121	76	46	0	0	0	11	22	3	34	4	54	168	315	91
2015-10-18	64	good	46	68	7	0.8	41	50	4	6	3	13	32766	38	10203	10235	10143	164	185	134	50	35	0	0	0	24	46	3	78	1	79	168	320	95
2015-10-19	78	good	57	103	6	0.9	61	46	2	6	2	10	32766	24	10132	10206	10090	141	190	95	63	49	0	0	0	18	34	11	58	10	75	171	337	74
2015-10-20	99	good	74	113	9	1.4	65	15	4	7	3	14	32766	21	10138	10160	10114	131	144	115	69	34	0	0	0	16	38	4	67	3	0	120	140	93
2015-10-21	70	good	51	77	2	0.9	41	28	3	6	4	13	32766	11	10198	10225	10140	100	131	95	95	61	16	5	21	13	44	4	73	3	0	108	127	101
2015-10-22	54	good	29	49	2	0.7	43	25	2	3	7	12	32766	15	10206	10228	10184	102	111	83	83	68	84	7	91	15	24	2	41	3	0	104	124	88
2015-10-23	74	good	54	77	3	0.9	53	45	3	3	2	8	32766	14	10146	10187	10118	129	189	86	81	54	0	0	0	18	36	11	56	11	89	136	264	74
2015-10-24	75	good	55	76	6	1	53	51	3	4	3	10	32766	21	10206	10246	10136	134	186	79	72	35	0	0	0	17	38	4	59	4	77	131	259	49
2015-10-25	74	good	37	84	10	0.9	59	23	2	3	2	7	32766	28	10239	10265	10204	115	145	93	55	26	0	0	0	14	33	9	50	10	6	120	229	73
2015-10-26	63	good	28	75	2	0.5	29	51	1	5	2	8	32766	21	10149	10214	10110	105	150	79	71	20	48	0	48	27	73	15	141	15	29	100	181	53
2015-10-27	48	perfect	15	48	3	0.5	37	52	4	5	1	10	32766	33	10128	10153	10101	114	171	53	37	18	0	0	0	21	69	14	133	14	73	92	243	0
2015-10-28	30	perfect	8	20	3	0.3	24	57	4	5	3	12	32766	38	10187	10212	10134	115	160	59	26	18	0	0	0	30	54	13	94	16	97	96	269	-1
2015-10-29	30	perfect	7	22	3	0.3	20	59	2	2	4	8	32766	40	10233	10249	10192	93	137	52	24	13	0	0	0	28	60	14	114	13	95	91	253	-5
2015-10-30	58	good	25	52	4	0.7	46	44	2	4	2	8	32766	35	10272	10284	10249	77	141	3	43	22	0	0	0	15	39	2	70	1	97	85	277	-28
2015-10-31	73	good	43	70	5	0.8	58	42	0	3	4	7	32766	17	10274	10299	10248	80	162	3	57	21	0	0	0	11	31	11	57	9	92	84	291	-26
2015-11-01	98	good	72	106	7	1	78	39	3	5	3	11	35	32766	10200	10249	10171	92	175	25	58	24	0	0	0	16	35	11	55	13	92	92	284	-2
2015-11-02	102	mild pollution	76	116	8	1.4	78	44	3	7	2	12	36	32766	10174	10187	10159	102	201	21	62	20	0	0	0	14	37	10	59	11	95	98	306	-13
2015-11-03	199	moderate pollution	149	181	16	1.9	90	63	2	4	2	8	27	32766	10188	10205	10173	100	185	30	70	38	0	0	0	13	49	10	80	11	78	97	267	4
2015-11-04	260	severe pollution	210	0	15	2	108	29	3	6	2	11	18	32766	10193	10205	10179	110	162	61	68	47	0	0	0	9	34	10	50	9	31	109	241	36
2015-11-05	144	mild pollution	110	0	6	1	53	26	3	6	3	12	5	32766	10252	10290	10201	95	132	49	78	59	0	15	15	22	44	3	72	1	0	87	111	46
2015-11-06	37	perfect	20	9	2	0.5	29	38	2	3	3	8	2	32766	10270	10293	10240	22	49	8	89	63	44	45	89	29	49	3	83	2	0	19	46	-2
2015-11-07	37	perfect	19	0	2	0.5	29	41	3	4	2	9	7	32766	10241	10267	10217	27	50	7	85	63	23	0	23	28	48	3	99	3	0	30	83	-2
2015-11-08	82	good	60	89	3	0.9	46	37	2	4	3	9	12	32766	10217	10240	10198	45	73	33	75	63	0	0	0	14	25	3	41	2	0	50	141	11
2015-11-09	163	moderate pollution	124	0	4	1.6	56	7	3	3	4	10	6	32766	10237	10249	10220	57	68	26	84	80	0	0	0	18	29	13	43	11	0	57	86	-1
2015-11-10	175	moderate pollution	132	0	4	1.6	55	5	3	2	2	7	6	32766	10256	10268	10244	61	64	57	85	79	0	0	0	14	22	9	40	13	0	59	77	51
2015-11-11	137	mild pollution	104	0	4	1.9	55	11	2	5	2	9	4	32766	10272	10279	10256	66	76	58	87	74	0	0	0	15	22	9	31	9	0	61	82	54
2015-11-12	205	severe pollution	155	136	6	2.5	60	3	2	4	2	8	6	32766	10263	10283	10242	71	79	62	88	79	0	0	0	12	26	11	41	10	0	71	101	59
2015-11-13	258	severe pollution	208	188	15	3.1	70	4	3	6	3	12	3	32766	10189	10242	10158	74	99	54	84	69	0	0	0	7	20	10	35	10	0	71	128	31
2015-11-14	324	gross pollution	274	298	17	3.6	83	11	4	6	3	13	11	32766	10127	10160	10109	87	102	68	86	76	0	0	0	15	30	10	42	10	0	87	125	50
2015-11-15	246	severe pollution	196	0	13	3.2	70	31	3	7	2	12	15	32766	10167	10196	10131	95	126	61	80	59	0	0	0	16	32	4	55	5	10	86	168	37
2015-11-16	79	good	58	85	10	1.5	52	18	2	6	2	10	16	32766	10171	10201	10148	74	102	61	73	49	9	0	9	15	38	12	62	11	12	71	159	31
2015-11-17	82	good	60	86	7	1.5	45	21	1	2	1	4	15	32766	10222	10258	10170	52	99	11	78	32	0	0	0	14	41	4	63	4	0	37	120	-8
2015-11-18	92	good	68	90	7	1.1	45	9	1	3	2	6	13	32766	10238	10260	10211	43	60	26	74	53	0	0	0	19	40	9	67	10	0	44	82	25
2015-11-19	102	mild pollution	76	0	4	1.7	45	2	4	6	3	13	2	32766	10220	10234	10201	39	52	12	95	79	0	21	21	20	44	5	73	5	0	43	62	23
2015-11-20	88	good	65	0	9	2.3	43	3	2	5	1	8	8	32766	10237	10256	10219	8	14	1	97	93	18	13	31	20	35	6	61	6	0	18	34	-1
2015-11-21	60	good	43	0	7	2.1	41	4	0	3	1	4	0	32766	10279	10309	10252	6	16	0	99	95	17	13	30	17	34	5	60	5	0	16	22	10
2015-11-22	69	good	50	0	7	1	39	33	0	4	2	6	0	32766	10322	10336	10307	-20	5	-38	92	75	11	61	72	18	38	5	61	4	0	1	10	-2
2015-11-23	39	perfect	27	37	10	0.7	28	51	0	3	1	4	16	32766	10343	10373	10321	-22	1	-38	72	45	6	0	6	20	42	3	81	2	47	-1	1	-2
2015-11-24	65	good	45	0	8	1.1	52	41	3	6	3	12	12	32766	10354	10387	10324	-48	-14	-59	56	41	0	0	0	25	45	3	77	4	0	-3	-1	-4
2015-11-25	69	good	50	22	9	1.1	37	52	3	5	0	8	13	32766	10274	10325	10245	-51	-9	-68	60	33	0	0	0	37	83	16	152	16	40	-9	3	-33
2015-11-26	55	good	38	60	11	0.9	37	56	1	2	1	4	19	32766	10284	10312	10261	-59	-13	-87	40	29	0	0	0	32	76	16	131	16	88	-40	4	-65
2015-11-27	264	severe pollution	214	245	36	2.9	93	15	1	5	3	9	7	32766	10223	10262	10196	-42	-14	-67	65	55	0	0	0	18	23	11	34	11	30	-25	3	-50
2015-11-28	308	gross pollution	258	254	44	4	102	13	2	4	2	8	9	32766	10251	10272	10226	-13	7	-29	70	54	0	0	0	13	28	4	41	4	8	-9	18	-24
2015-11-29	302	gross pollution	252	0	38	4.9	108	21	2	6	3	11	5	32766	10227	10259	10208	7	70	-36	76	46	0	0	0	9	29	12	44	11	62	-3	44	-34
2015-11-30	450	gross pollution	343	550	24	6	124	11	5	9	3	17	5	32766	10213	10238	10188	-11	27	-42	89	68	0	0	0	10	26	4	39	3	0	-18	9	-43
2015-12-01	476	gross pollution	464	454	35	7.9	133	9	4	4	1	9	2	32766	10159	10197	10131	-1	8	-11	97	92	0	0	0	19	26	10	45	12	0	-5	-3	-14
2015-12-02	24	perfect	7	22	3	0.3	16	47	4	5	2	11	29	32766	10170	10181	10153	29	56	-28	29	21	0	0	0	38	83	14	154	15	61	-11	63	-46
2015-12-03	33	perfect	10	33	5	0.4	16	47	4	2	3	9	45	32766	10201	10238	10164	5	25	-9	28	23	0	0	0	46	81	15	151	15	90	-18	31	-38
2015-12-04	54	good	31	58	12	0.9	43	46	2	4	3	9	23	32766	10228	10244	10209	14	69	-25	35	21	0	0	0	18	48	13	82	2	86	-15	59	-55
2015-12-05	77	good	49	85	17	1.4	61	40	3	4	0	7	18	32766	10252	10275	10216	19	90	-39	47	23	0	0	0	14	39	3	55	2	81	-11	55	-49
2015-12-06	175	moderate pollution	132	162	32	2.8	88	11	1	3	1	5	9	32766	10260	10277	10240	15	67	-25	64	41	0	0	0	11	23	10	40	10	65	-10	39	-39
2015-12-07	230	severe pollution	180	199	36	3.5	93	9	4	5	2	11	13	32766	10287	10302	10265	23	53	0	71	56	0	0	0	12	23	4	32	6	36	9	62	-14
2015-12-08	295	severe pollution	245	246	20	4.3	92	7	3	5	2	10	3	32766	10268	10295	10246	16	26	-12	90	81	0	0	0	8	22	3	36	2	0	7	26	-22
2015-12-09	294	severe pollution	244	10	32	3.6	94	9	2	2	2	6	6	32766	10216	10253	10192	32	49	15	88	75	0	0	0	15	23	4	32	4	0	27	73	11
2015-12-10	127	mild pollution	96	47	15	1.8	52	55	2	5	2	9	32	32766	10215	10245	10188	47	96	-9	57	21	0	0	0	25	55	2	103	16	84	22	129	-28
2015-12-11	75	good	48	86	15	1.4	60	35	4	7	1	12	18	32766	10252	10275	10236	15	66	-31	48	25	0	0	0	13	29	10	45	10	79	-5	103	-50
2015-12-12	172	moderate pollution	130	174	23	2.8	86	12	2	5	2	9	7	32766	10223	10241	10205	8	55	-19	71	46	0	0	0	9	25	9	35	9	21	-5	78	-31
2015-12-13	229	severe pollution	179	219	39	3.9	98	12	3	4	2	9	6	32766	10231	10253	10220	10	45	-23	72	50	0	0	0	14	22	4	32	7	20	-7	55	-40
2015-12-14	207	severe pollution	157	27	16	2.7	75	44	3	4	2	9	2	32766	10196	10224	10175	14	39	2	86	45	18	0	18	16	33	10	54	13	8	11	79	-21
2015-12-15	28	perfect	7	13	3	0.4	16	56	3	6	2	11	37	32766	10223	10250	10194	21	38	-1	29	20	0	0	0	39	71	14	126	13	85	-10	56	-39
2015-12-16	23	perfect	8	14	4	0.5	18	45	2	4	2	8	39	32766	10274	10304	10248	-7	18	-20	27	21	0	0	0	40	72	16	144	16	86	-20	38	-46
2015-12-17	84	good	62	91	18	1.6	62	26	3	7	2	12	16	32766	10288	10310	10265	-25	36	-77	43	24	0	0	0	14	41	1	76	1	75	-37	39	-79
2015-12-18	80	good	58	85	18	1.8	64	35	2	5	2	9	20	32766	10295	10327	10265	-1	71	-61	47	23	0	0	0	16	54	2	84	2	86	-22	86	-69
2015-12-19	168	moderate pollution	127	155	29	3	87	12	3	3	3	9	4	32766	10313	10340	10286	-10	46	-55	70	48	0	0	0	13	25	11	51	7	45	-24	64	-70
2015-12-20	249	severe pollution	199	194	27	3.6	101	10	4	6	3	13	4	32766	10227	10286	10196	-10	31	-31	82	59	0	0	0	10	18	3	27	3	4	-25	35	-50
2015-12-21	280	severe pollution	230	284	23	4.1	104	12	4	8	3	15	3	32766	10230	10253	10212	-10	55	-52	81	47	0	0	0	9	27	3	38	3	66	-32	56	-72
2015-12-22	347	gross pollution	297	427	29	5.3	103	10	4	6	2	12	4	32766	10239	10260	10222	-12	9	-47	87	76	0	0	0	17	27	4	40	5	0	-25	12	-66
2015-12-23	305	gross pollution	255	298	21	4.7	104	32	3	4	2	9	3	32766	10225	10242	10208	6	70	-29	80	39	0	0	0	9	26	10	35	10	46	-11	64	-53
2015-12-24	209	severe pollution	159	275	18	2.7	80	40	5	6	3	14	15	32766	10234	10251	10222	-1	35	-26	72	48	0	0	0	16	31	4	42	4	34	-25	47	-63
2015-12-25	485	gross pollution	477	510	12	7.3	141	13	4	8	2	14	0	32766	10156	10233	10122	-42	-10	-58	98	94	0	0	0	18	25	11	45	8	0	-26	9	-65
2015-12-26	315	gross pollution	265	381	9	4.9	102	10	2	4	2	8	2	32766	10204	10299	10129	-24	2	-49	82	56	0	0	0	24	46	4	74	5	6	-8	53	-53
2015-12-27	75	good	49	100	13	1.2	53	24	3	5	3	11	8	32766	10345	10365	10300	-38	-18	-52	60	49	0	0	0	19	36	11	62	10	0	-27	26	-55
2015-12-28	149	mild pollution	114	175	23	2.3	79	16	4	9	3	16	8	32766	10313	10341	10290	-30	36	-82	58	30	0	0	0	14	26	10	39	9	79	-36	95	-95
2015-12-29	329	gross pollution	279	338	34	4.4	119	9	4	9	3	16	5	32766	10250	10295	10218	-16	34	-52	72	49	0	0	0	13	25	3	36	4	46	-34	77	-79
2015-12-30	104	mild pollution	78	39	11	1.5	54	56	5	9	3	17	25	32766	10265	10292	10238	21	64	-39	47	26	0	0	0	28	54	16	97	15	77	-14	119	-79
2015-12-31	90	good	66	128	16	1.8	72	25	1	3	3	7	11	32766	10288	10312	10264	-14	53	-63	53	31	0	0	0	7	23	9	36	15	68	-39	100	-96
2016-01-01	226	severe pollution	176	199	33	3.4	106	12	0	3	1	4	8	32766	10200	10264	10166	-11	57	-49	63	37	0	0	0	9	26	3	39	3	65	-35	87	-86
2016-01-02	316	gross pollution	266	299	35	4.6	124	16	6	9	5	20	5	32766	10161	10180	10141	1	80	-55	69	38	0	0	0	10	22	4	31	14	64	-25	101	-86
2016-01-03	297	severe pollution	247	296	20	3.5	83	22	5	8	6	19	4	32766	10189	10212	10167	-4	32	-36	77	44	0	0	0	17	33	4	47	4	47	-17	88	-64
2016-01-04	53	good	37	23	6	0.9	33	59	5	12	5	22	24	32766	10256	10278	10210	-8	24	-46	44	20	0	0	0	29	58	2	111	3	62	-27	113	-85
2016-01-05	63	good	34	76	11	0.9	38	50	4	13	6	23	25	32766	10263	10284	10241	-28	9	-57	28	20	0	0	0	22	52	2	85	2	86	-42	105	-103
2016-01-06	44	perfect	25	40	10	0.9	35	54	4	13	4	21	19	32766	10268	10286	10252	-21	41	-83	36	16	0	0	0	29	50	16	101	15	76	-43	122	-128
2016-01-07	35	perfect	13	22	6	0.6	28	54	5	9	9	23	31	32766	10279	10312	10247	-26	20	-55	30	19	0	0	0	28	64	16	113	1	86	-42	109	-99
2016-01-08	54	good	35	55	13	0.9	43	51	5	8	2	15	20	32766	10239	10262	10228	-20	22	-44	29	18	0	0	0	23	44	3	83	1	85	-47	113	-112
2016-01-09	102	mild pollution	76	102	23	1.9	74	26	4	9	3	16	10	32766	10212	10232	10193	-27	55	-83	43	18	0	0	0	12	25	10	37	9	77	-52	135	-135
2016-01-10	69	good	46	61	20	1.5	55	35	6	7	10	23	13	32766	10263	10303	10211	-30	13	-59	45	25	0	0	0	12	35	4	57	4	42	-64	95	-117
2016-01-11	32	perfect	11	22	6	0.6	25	59	8	15	10	33	24	32766	10321	10342	10301	-43	-13	-66	24	18	0	0	0	33	58	1	107	2	82	-50	96	-113
2016-01-12	38	perfect	14	27	8	0.7	30	55	5	8	8	21	22	32766	10285	10325	10249	-50	-1	-96	25	15	0	0	0	24	48	1	90	1	89	-62	109	-144
2016-01-13	62	good	26	48	14	1	49	47	7	16	5	28	15	32766	10205	10250	10179	-33	25	-78	26	14	0	0	0	18	36	11	59	1	50	-71	90	-133
2016-01-14	98	good	73	98	27	1.9	73	40	9	16	9	34	11	32766	10169	10194	10146	-25	49	-83	35	13	0	0	0	12	39	12	61	13	72	-59	126	-143
2016-01-15	132	mild pollution	100	127	33	2.6	84	25	9	17	7	33	9	32766	10142	10156	10122	-22	45	-83	37	18	0	0	0	11	28	3	42	4	67	-48	133	-137
2016-01-16	162	moderate pollution	123	137	44	2.5	71	15	8	17	9	34	12	32766	10188	10209	10146	-28	17	-44	60	30	0	0	0	17	39	6	70	5	0	-35	4	-93
2016-01-17	53	good	37	25	9	0.8	29	68	7	15	9	31	18	32766	10226	10253	10196	-53	-19	-70	41	20	1	0	1	29	65	1	115	16	84	-45	84	-109
2016-01-18	45	perfect	10	45	4	0.5	18	62	9	21	11	41	23	32766	10235	10250	10215	-81	-47	-116	24	16	0	0	0	33	79	16	130	1	82	-81	64	-150
2016-01-19	84	good	62	90	23	1.7	62	39	1	4	3	8	15	32766	10272	10288	10250	-75	-12	-137	37	18	0	0	0	16	40	11	70	12	86	-99	87	-182
2016-01-20	153	moderate pollution	117	141	56	3.4	78	11	8	19	8	35	8	32766	10308	10334	10288	-60	-29	-93	46	29	0	0	0	19	29	4	44	3	25	-69	62	-150
2016-01-21	173	moderate pollution	131	130	28	2.7	68	12	8	12	7	27	7	32766	10298	10314	10278	-54	-28	-72	76	47	0	0	0	17	31	4	53	3	29	-44	72	-98
2016-01-22	33	perfect	13	33	4	0.6	16	65	10	17	9	36	19	32766	10387	10421	10314	-90	-48	-109	21	14	0	0	0	47	73	16	150	16	58	-72	58	-135
2016-01-23	47	perfect	9	47	4	0.6	12	63	8	14	3	25	15	32766	10400	10423	10384	-143	-109	-152	22	14	0	0	0	42	82	16	147	16	85	-122	24	-179
2016-01-24	47	perfect	13	47	6	0.6	24	60	9	13	4	26	20	32766	10357	10413	10318	-100	-39	-151	25	15	0	0	0	39	80	16	153	15	81	-96	92	-167
2016-01-25	54	good	28	48	17	0.8	43	50	7	21	6	34	16	32766	10266	10321	10231	-41	22	-101	25	13	0	0	0	15	32	12	49	16	87	-75	143	-170
2016-01-26	56	good	35	62	18	0.8	37	58	4	24	3	31	29	32766	10240	10263	10229	-14	28	-71	19	14	0	0	0	37	65	1	114	1	90	-37	146	-150
2016-01-27	129	mild pollution	98	112	38	2.2	79	27	11	22	8	41	14	32766	10238	10256	10222	-45	27	-102	37	17	0	0	0	11	27	10	45	10	78	-75	123	-162
2016-01-28	159	moderate pollution	121	139	44	2.3	80	37	10	19	9	38	16	32766	10258	10274	10233	-24	40	-60	35	18	0	0	0	15	35	2	51	3	77	-42	129	-125
2016-01-29	84	good	62	80	36	1.8	55	28	10	15	11	36	14	32766	10316	10342	10273	-48	-9	-79	40	26	0	0	0	13	37	7	71	7	66	-59	109	-140
2016-01-30	69	good	50	65	21	1.3	48	40	9	16	8	33	13	32766	10317	10334	10304	-56	-24	-82	48	20	0	0	0	14	40	3	58	3	45	-51	110	-128
2016-01-31	38	perfect	18	26	10	0.6	30	66	4	14	6	24	23	32766	10335	10352	10312	-34	23	-93	23	15	0	0	0	37	51	16	95	16	86	-37	163	-160
2016-02-01	40	perfect	13	24	9	0.6	32	68	15	29	9	53	23	32766	10320	10340	10295	-15	43	-84	29	15	0	0	0	23	46	16	87	16	95	-31	193	-159
2016-02-02	62	good	29	40	16	0.9	49	55	7	35	4	46	20	32766	10272	10312	10239	-23	51	-90	32	15	0	0	0	12	34	3	62	1	91	-51	199	-163
2016-02-03	69	good	35	48	19	1.2	55	43	7	38	9	54	20	32766	10241	10252	10219	-18	76	-85	34	14	0	0	0	12	29	2	47	1	85	-48	251	-148
2016-02-04	36	perfect	13	24	8	0.5	23	71	12	38	11	61	33	32766	10265	10285	10240	17	49	-14	20	13	0	0	0	31	53	2	97	2	82	6	188	-90
2016-02-05	38	perfect	10	32	6	0.4	16	76	38	58	12	108	41	32766	10268	10277	10252	8	34	-24	23	16	0	0	0	39	71	1	131	2	98	5	166	-80
2016-02-06	45	perfect	31	45	14	0.8	36	70	26	48	6	80	26	32766	10256	10281	10226	-3	62	-64	29	16	0	0	0	20	42	1	85	1	85	-26	198	-128
2016-02-07	69	good	50	85	23	0.9	38	74	32	51	3	86	23	32766	10165	10228	10133	-6	87	-71	34	13	0	0	0	13	47	12	74	13	90	-23	217	-128
2016-02-08	238	severe pollution	188	263	53	1	37	74	22	34	14	70	44	32766	10111	10137	10080	30	117	-49	28	12	0	0	0	26	73	1	126	1	95	9	222	-102
2016-02-09	60	good	43	53	20	1.1	41	82	17	32	12	61	31	32766	10175	10205	10136	30	115	-47	35	15	0	0	0	15	46	10	72	11	90	13	240	-94
2016-02-10	128	mild pollution	97	115	50	2.5	65	50	21	62	24	107	24	32766	10143	10169	10119	16	90	-49	40	23	0	0	0	11	34	4	50	4	72	0	197	-94
2016-02-11	202	severe pollution	152	168	42	3	68	26	41	53	15	109	8	32766	10128	10142	10112	44	64	3	75	39	0	0	0	12	28	4	38	3	0	25	78	-45
2016-02-12	192	moderate pollution	144	100	18	2.2	54	41	34	37	7	78	14	32766	10121	10133	10100	54	107	0	83	49	0	16	16	10	28	4	39	4	41	45	224	-47
2016-02-13	34	perfect	9	14	5	0.3	12	68	19	27	4	50	40	32766	10209	10256	10124	13	62	-20	46	20	64	0	64	60	79	16	159	16	46	23	117	-19
2016-02-14	36	perfect	7	16	3	0.4	11	72	21	35	10	66	35	32766	10279	10297	10256	-38	0	-65	24	18	0	0	0	57	80	16	158	16	95	-30	52	-75
2016-02-15	46	perfect	7	46	4	0.3	14	71	14	25	6	45	34	32766	10224	10285	10191	-2	50	-74	27	17	0	0	0	33	67	14	145	14	96	-9	122	-88
2016-02-16	38	perfect	8	36	5	0.3	18	76	12	37	12	61	47	32766	10188	10204	10171	41	87	-39	28	18	0	0	0	26	84	16	159	16	97	9	148	-72
2016-02-17	64	good	46	44	16	1.1	48	73	10	12	5	27	33	32766	10184	10223	10140	32	100	-43	40	20	0	0	0	22	53	10	76	16	95	15	206	-73
2016-02-18	42	perfect	14	32	5	0.4	22	83	10	12	5	27	55	32766	10165	10192	10130	50	97	0	23	11	0	0	0	26	71	14	135	13	97	28	200	-57
2016-02-19	40	perfect	15	33	5	0.5	26	79	4	11	1	16	47	32766	10243	10291	10192	37	68	1	24	10	0	0	0	30	71	14	134	15	66	37	206	-44
2016-02-20	40	perfect	16	24	6	0.5	22	79	4	12	6	22	40	32766	10268	10301	10224	2	45	-18	18	11	0	0	0	27	54	1	107	14	102	9	189	-65
2016-02-21	108	mild pollution	81	107	26	1.5	57	55	17	20	12	49	19	32766	10226	10249	10199	-3	61	-72	40	17	0	0	0	19	51	10	87	11	66	-17	147	-93
2016-02-22	92	good	68	74	16	1.1	40	80	2	3	1	6	37	32766	10233	10280	10203	21	88	-45	44	11	0	0	0	31	75	16	134	1	88	22	199	-67
2016-02-23	41	perfect	11	18	5	0.4	17	81	6	15	5	26	43	32766	10342	10362	10281	2	43	-21	21	13	0	0	0	35	63	16	130	15	97	6	186	-79
2016-02-24	49	perfect	26	49	9	0.7	35	70	5	12	3	20	27	32766	10313	10354	10271	8	74	-71	26	12	0	0	0	19	44	12	75	12	87	3	220	-104
2016-02-25	45	perfect	25	44	10	0.7	36	61	2	16	5	23	42	32766	10287	10310	10252	28	73	-44	23	15	0	0	0	22	61	16	103	16	97	22	221	-85
2016-02-26	55	good	36	60	14	0.8	40	69	8	12	6	26	48	32766	10222	10289	10160	33	87	-9	23	16	0	0	0	28	61	10	107	1	95	14	172	-73
2016-02-27	45	perfect	22	35	9	0.6	36	71	4	5	3	12	35	32766	10207	10221	10177	42	88	-24	35	22	0	0	0	21	45	10	71	9	92	43	229	-70
2016-02-28	48	perfect	31	48	7	0.8	33	79	8	10	4	22	45	32766	10261	10312	10209	12	71	-44	47	13	1	0	1	23	70	15	130	14	95	36	226	-66
2016-02-29	53	good	35	47	12	0.7	42	70	7	14	7	28	27	32766	10298	10334	10259	-5	36	-56	26	17	0	0	0	21	54	1	96	1	70	1	202	-85
2016-03-01	158	moderate pollution	120	136	30	1.9	85	50	8	23	10	41	32	32766	10203	10260	10160	35	107	-40	38	21	0	0	0	19	41	11	62	10	93	38	217	-65
2016-03-02	212	severe pollution	162	190	32	2.5	110	62	5	16	5	26	44	32766	10125	10166	10097	81	194	-15	40	14	0	0	0	8	35	8	54	9	94	66	287	-49
2016-03-03	333	gross pollution	283	283	46	3.5	119	50	6	16	6	28	28	32766	10087	10111	10071	83	139	39	55	29	0	0	0	20	32	4	54	9	30	49	228	-22
2016-03-04	365	gross pollution	315	414	47	4.3	113	22	9	23	7	39	11	32766	10139	10153	10099	67	88	25	67	58	0	0	0	17	31	4	49	5	0	30	94	-24
2016-03-05	170	moderate pollution	58	290	3	0.4	23	78	6	14	8	28	83	32766	10160	10178	10139	99	129	72	15	10	0	0	0	40	72	16	144	16	101	94	277	6
2016-03-06	116	mild pollution	73	182	28	1.6	68	41	13	27	8	48	32	32766	10135	10168	10096	55	110	1	35	15	0	0	0	12	31	4	47	4	22	43	212	-47
2016-03-07	70	good	34	89	10	0.9	33	84	10	27	9	46	66	32766	10175	10214	10116	69	108	0	23	8	0	0	0	33	93	16	157	1	106	73	280	-47
2016-03-08	39	perfect	10	25	3	0.4	16	77	9	28	10	47	60	32766	10265	10292	10214	23	64	-7	12	8	0	0	0	44	66	1	118	2	100	57	265	-37
2016-03-09	37	perfect	10	26	4	0.4	16	73	6	18	6	30	54	32766	10293	10319	10266	20	56	-14	13	8	0	0	0	50	67	2	123	1	103	54	273	-52
2016-03-10	49	perfect	11	49	4	0.4	18	75	2	4	2	8	52	32766	10271	10303	10228	30	75	-13	15	9	0	0	0	25	66	14	116	14	105	49	293	-77
2016-03-11	51	good	24	52	8	0.6	36	76	12	11	16	39	46	32766	10205	10250	10163	38	84	-31	19	12	0	0	0	21	46	12	82	14	107	55	316	-86
2016-03-12	144	mild pollution	110	138	40	1.8	82	44	10	16	9	35	28	32766	10142	10173	10111	34	99	-15	41	21	0	0	0	12	31	10	48	10	78	36	265	-72
2016-03-13	48	perfect	30	48	9	0.6	32	92	7	13	7	27	63	32766	10203	10235	10139	75	129	8	18	10	0	0	0	29	56	1	99	16	108	86	324	-58
2016-03-14	103	mild pollution	77	118	21	1.3	64	72	7	15	15	37	55	32766	10188	10219	10149	79	170	-14	32	9	0	0	0	24	51	11	80	11	102	93	361	-73
2016-03-15	190	moderate pollution	143	198	47	1.6	79	56	7	6	5	18	46	32766	10138	10165	10110	91	132	60	35	16	0	0	0	28	51	11	82	10	11	79	249	1
2016-03-16	300	severe pollution	250	261	38	2.2	89	120	8	4	5	17	39	32766	10123	10146	10103	101	173	19	59	31	0	0	0	15	44	11	72	11	67	98	316	-38
2016-03-17	338	gross pollution	288	298	31	2.3	103	106	6	11	9	26	37	32766	10082	10118	10045	115	178	45	54	36	0	0	0	16	31	11	54	6	70	114	315	-8
2016-03-18	227	severe pollution	177	55	12	1.4	64	112	6	14	6	26	63	32766	10077	10102	10057	140	222	65	40	10	0	0	0	18	52	3	76	3	87	134	376	-3
2016-03-19	88	good	65	113	17	1	44	76	6	15	8	29	58	32766	10182	10209	10102	111	162	82	37	16	0	0	0	30	41	3	75	3	74	125	342	18
2016-03-20	89	good	66	113	10	1	62	86	6	29	13	48	53	32766	10218	10244	10194	113	191	25	36	14	0	0	0	14	40	9	54	10	104	137	423	-17
2016-03-21	163	moderate pollution	124	179	21	1.2	80	116	7	16	7	30	60	32766	10185	10218	10144	121	196	29	38	22	0	0	0	16	54	10	84	10	86	118	371	-32
2016-03-22	138	mild pollution	105	207	25	1.4	75	68	7	23	13	43	42	32766	10180	10201	10143	126	156	107	39	31	0	0	0	19	43	11	71	6	0	128	262	57
2016-03-23	43	perfect	16	37	4	0.5	26	85	6	21	8	35	70	32766	10273	10297	10200	98	149	58	27	10	0	0	0	34	54	3	98	4	115	133	401	-6
2016-03-24	44	perfect	13	24	3	0.4	31	87	6	21	6	33	66	32766	10281	10305	10240	99	148	18	16	10	0	0	0	21	43	2	95	13	119	127	389	-58
2016-03-25	48	perfect	17	38	4	0.5	38	89	6	12	8	26	62	32766	10246	10268	10211	102	147	20	20	13	0	0	0	27	45	2	115	14	112	135	404	-53
2016-03-26	45	perfect	12	29	4	0.4	27	90	3	9	3	15	80	32766	10206	10232	10168	117	196	35	22	10	0	0	0	27	59	16	97	1	113	144	420	-31
2016-03-27	47	perfect	17	47	4	0.4	35	92	6	18	8	32	89	32766	10149	10183	10106	153	221	45	14	6	0	0	0	22	44	10	86	11	115	163	472	-37
2016-03-28	123	mild pollution	70	195	16	0.8	66	77	10	17	3	30	70	32766	10075	10120	10038	162	229	71	22	13	0	0	0	27	63	14	102	15	85	179	473	10
2016-03-29	62	good	19	74	5	0.4	33	96	7	17	3	27	121	32766	10121	10149	10068	173	228	82	20	13	0	0	0	21	77	16	149	16	116	207	469	8
2016-03-30	63	good	30	76	9	0.6	42	93	9	13	6	28	82	32766	10127	10160	10087	157	228	96	22	12	0	0	0	23	37	7	72	9	109	193	478	6
2016-03-31	199	moderate pollution	149	239	33	1.4	73	118	7	10	8	25	2	32766	10038	10096	9990	160	238	81	48	27	0	0	0	25	54	10	84	9	88	174	400	32
2016-04-01	93	good	35	135	6	0.4	26	95	11	8	3	22	32766	67	10038	10092	9985	186	218	133	30	14	0	0	0	41	78	16	145	1	96	219	434	85
2016-04-02	43	perfect	9	28	3	0.2	16	86	2	6	4	12	32766	63	10159	10178	10093	148	194	115	22	8	4	0	4	38	59	15	114	16	71	165	442	75
2016-04-03	52	good	20	54	3	0.3	26	93	3	10	4	17	32766	47	10177	10214	10131	150	192	93	13	7	0	0	0	27	46	10	83	16	103	213	493	34
2016-04-04	103	mild pollution	77	114	12	0.6	48	121	5	12	6	23	32766	44	10087	10139	10049	150	219	67	41	21	0	0	0	24	53	11	90	12	107	196	478	9
2016-04-05	148	mild pollution	113	146	19	1	52	142	6	15	7	28	32766	38	10082	10105	10054	159	223	80	48	34	0	0	0	28	58	5	96	6	97	198	437	24
2016-04-06	192	moderate pollution	144	182	30	2	71	96	4	11	9	24	32766	32	10059	10103	10000	148	201	95	49	26	0	0	0	21	43	5	65	4	3	173	389	46
2016-04-07	108	mild pollution	81	112	4	1	43	90	6	15	5	26	32766	56	10071	10096	10030	186	249	93	35	10	0	0	0	24	58	1	119	16	106	225	502	40
2016-04-08	71	good	25	92	5	0.4	32	97	5	12	4	21	32766	85	10104	10139	10044	186	244	86	10	5	0	0	0	46	72	11	116	1	122	224	497	-4
2016-04-09	148	mild pollution	73	245	11	0.7	55	95	4	7	6	17	32766	53	10060	10083	10042	162	257	93	34	13	0	0	0	26	61	11	104	8	105	205	502	23
2016-04-10	121	mild pollution	54	192	13	0.8	43	95	5	12	3	20	32766	53	10136	10161	10083	130	196	50	20	14	0	0	0	18	58	9	106	10	109	190	471	2
2016-04-11	77	good	41	103	9	0.6	42	89	4	7	6	17	32766	48	10145	10199	10074	104	159	45	38	20	0	0	0	26	53	9	82	9	68	161	430	-4
2016-04-12	105	mild pollution	79	104	6	0.8	58	76	5	15	4	24	32766	22	10039	10098	10009	123	189	70	58	40	12	1	13	13	36	13	60	13	53	165	398	47
2016-04-13	158	moderate pollution	120	134	7	1	64	104	5	14	4	23	32766	29	10004	10032	9970	175	255	80	49	9	0	0	0	17	43	16	80	15	84	207	459	41
2016-04-14	76	good	32	101	4	0.3	28	108	5	12	2	19	32766	73	10104	10135	10014	184	237	136	19	9	0	0	0	38	63	3	105	11	109	237	527	60
2016-04-15	80	good	59	107	16	1	58	91	6	9	5	20	32766	38	10083	10130	10041	162	221	81	38	26	0	0	0	21	41	10	67	10	70	222	495	36
2016-04-16	61	good	38	71	9	0.7	37	91	6	7	5	18	32766	56	10057	10078	10033	158	200	124	42	19	38	0	38	34	73	16	148	1	77	170	327	110
2016-04-17	46	perfect	16	35	2	0.3	16	91	5	9	5	19	32766	83	10071	10088	10052	160	202	121	16	9	0	0	0	30	82	14	145	14	120	185	448	46
2016-04-18	50	perfect	19	39	3	0.3	25	100	5	11	4	20	32766	63	10093	10105	10058	151	205	102	26	10	0	0	0	23	56	15	109	13	114	212	468	44
2016-04-19	98	good	73	104	20	1.3	65	64	4	10	5	19	32766	28	10128	10152	10098	128	159	85	51	20	0	0	0	20	33	4	52	3	0	142	297	36
2016-04-20	92	good	68	102	8	0.9	44	121	6	10	2	18	32766	46	10086	10125	10041	183	271	106	39	11	0	0	0	27	57	12	89	11	98	245	555	69
2016-04-21	127	mild pollution	96	165	7	0.9	58	124	4	6	4	14	32766	51	9995	10051	9947	206	319	100	37	9	0	0	0	20	49	15	92	14	116	258	548	46
2016-04-22	74	good	33	97	2	0.3	23	108	5	7	4	16	32766	92	10049	10064	9998	213	261	160	8	6	0	0	0	30	72	16	135	16	122	259	515	64
2016-04-23	54	good	23	58	4	0.3	30	97	4	7	3	14	32766	63	10105	10125	10056	176	222	119	13	7	0	0	0	31	46	3	70	3	81	211	480	42
2016-04-24	113	mild pollution	85	149	22	0.9	53	152	4	4	2	10	32766	49	10071	10109	10026	171	252	85	40	17	0	0	0	26	61	11	97	12	111	224	485	31
2016-04-25	119	mild pollution	90	141	14	0.7	34	172	5	6	2	13	32766	54	10078	10095	10038	222	286	161	45	22	0	0	0	27	67	11	111	10	104	281	521	111
2016-04-26	95	good	71	124	26	1.4	44	141	3	5	3	11	32766	61	10122	10143	10095	172	240	134	41	29	0	0	0	15	45	6	93	7	88	237	487	100
2016-04-27	120	mild pollution	91	134	9	1.1	62	115	3	11	5	19	32766	33	10105	10123	10087	162	193	125	55	32	0	0	0	13	32	13	55	7	12	200	389	86
2016-04-28	122	mild pollution	81	100	7	1	49	184	2	11	4	17	32766	47	10104	10129	10073	192	262	112	52	28	0	0	0	26	56	11	92	9	117	259	519	69
2016-04-29	168	moderate pollution	127	160	17	1.4	65	185	5	4	2	11	32766	48	10040	10099	9975	193	259	124	47	34	0	0	0	27	58	7	104	7	90	250	503	93
2016-04-30	209	severe pollution	159	168	10	1.4	58	232	5	3	3	11	32766	40	9987	10006	9953	228	312	145	57	30	0	0	0	25	44	8	74	6	105	288	548	95
2016-05-01	234	severe pollution	184	166	26	2.3	43	236	2	4	3	9	32766	28	9968	9980	9934	241	315	171	55	30	0	0	0	23	38	12	68	12	87	298	523	140
2016-05-02	82	good	50	103	2	0.5	20	138	4	7	4	15	32766	53	10040	10073	9970	162	284	114	64	35	2	79	81	35	81	1	167	14	0	148	251	111
2016-05-03	60	good	23	70	2	0.4	29	101	3	4	2	9	32766	68	9979	10050	9940	189	266	85	37	7	0	0	0	30	77	15	166	1	129	204	415	43
2016-05-04	68	good	29	59	4	0.5	49	121	2	3	3	8	32766	52	10012	10035	9976	208	287	91	27	10	0	0	0	26	49	10	90	10	89	247	536	48
2016-05-05	102	mild pollution	62	153	14	0.9	43	129	3	4	5	12	32766	53	10015	10034	9982	200	241	181	39	15	0	0	0	31	49	4	75	3	58	252	473	157
2016-05-06	116	mild pollution	57	182	2	0.2	13	100	2	6	4	12	32766	92	10075	10091	10010	203	255	150	18	9	0	0	0	39	101	15	182	16	130	246	505	109
2016-05-07	74	good	23	55	3	0.3	29	128	4	4	3	11	32766	73	10133	10157	10083	215	265	105	15	8	0	0	0	18	55	10	116	10	133	274	570	51
2016-05-08	97	good	60	103	15	0.7	44	156	3	8	3	14	32766	65	10089	10127	10052	202	269	122	39	18	0	0	0	30	64	9	106	10	117	267	518	75
2016-05-09	64	good	36	64	4	0.5	39	116	4	7	2	13	32766	39	10081	10090	10060	181	244	151	56	34	0	0	0	23	54	3	116	15	31	194	492	115
2016-05-10	100	good	43	76	4	0.5	36	160	3	4	1	8	32766	46	10054	10083	10021	209	282	116	49	21	0	0	0	23	47	11	95	10	123	282	569	73
2016-05-11	200	moderate pollution	150	166	12	1.1	36	177	4	4	4	12	32766	35	9978	10031	9935	225	267	179	58	39	0	0	0	29	53	10	89	11	64	267	482	157
2016-05-12	62	good	34	45	3	0.5	28	114	4	6	3	13	32766	53	10056	10130	9918	175	252	144	54	16	79	0	79	33	72	16	148	1	47	151	256	114
2016-05-13	73	good	32	60	6	0.6	43	127	3	6	3	12	32766	49	10163	10192	10130	176	243	78	43	20	0	0	0	27	65	10	102	10	110	220	462	37
2016-05-14	58	good	41	33	3	0.5	35	84	4	7	2	13	32766	19	10133	10157	10107	137	206	122	80	30	22	53	75	19	61	13	101	13	0	137	179	119
2016-05-15	49	perfect	34	33	2	0.5	36	87	3	6	2	11	32766	45	10094	10120	10063	175	241	119	46	10	0	0	0	22	52	16	106	14	112	213	419	102
2016-05-16	75	good	24	59	3	0.5	43	129	4	4	2	10	32766	65	10043	10080	10011	228	311	110	28	10	0	0	0	31	61	11	99	11	133	273	554	67
2016-05-17	162	moderate pollution	58	104	11	0.6	52	227	3	2	2	7	32766	58	10047	10063	10016	248	324	144	38	16	0	0	0	22	55	11	90	9	123	301	559	108
2016-05-18	134	mild pollution	61	101	9	0.5	35	197	3	6	3	12	32766	61	10083	10098	10053	244	297	182	47	29	0	0	0	29	55	10	95	13	120	311	529	145
2016-05-19	184	moderate pollution	86	118	15	0.8	38	249	4	5	3	12	32766	60	10098	10113	10083	240	294	174	41	24	0	0	0	24	50	10	92	10	111	309	537	146
2016-05-20	171	moderate pollution	88	110	20	1.1	49	236	3	2	3	8	32766	64	10117	10129	10093	228	288	170	46	24	0	0	0	23	37	7	64	9	93	285	547	144
2016-05-21	150	mild pollution	68	83	18	0.8	47	215	2	5	1	8	32766	68	10146	10160	10114	232	294	164	40	12	0	0	0	28	42	5	69	4	123	298	551	132
2016-05-22	142	mild pollution	49	87	8	0.7	51	206	2	3	3	8	32766	61	10136	10164	10097	234	297	170	35	19	0	0	0	14	35	4	63	7	93	308	586	144
2016-05-23	95	good	61	106	14	0.9	45	153	4	4	3	11	32766	45	10062	10108	10032	211	254	172	46	28	0	2	2	23	66	13	92	11	0	233	443	159
2016-05-24	75	good	19	44	3	0.4	28	129	4	5	3	12	32766	63	9995	10052	9949	213	295	119	42	19	0	0	0	23	66	11	105	11	113	293	577	85
2016-05-25	66	good	13	31	3	0.3	25	119	2	5	2	9	32766	74	10025	10042	9961	228	276	180	33	22	3	0	3	21	50	1	120	2	100	287	509	134
2016-05-26	63	good	22	61	2	0.3	31	115	4	5	2	11	32766	72	10055	10070	10027	243	310	165	28	13	0	0	0	24	54	11	89	1	134	320	583	131
2016-05-27	122	mild pollution	48	104	12	0.6	50	184	3	5	2	10	32766	63	10060	10078	10037	234	291	166	38	21	0	0	0	25	63	11	106	10	88	281	501	132
2016-05-28	138	mild pollution	48	87	10	0.7	38	201	4	3	3	10	32766	67	10020	10049	9991	238	303	155	40	24	0	0	0	25	55	10	83	11	116	328	584	111
2016-05-29	95	good	33	76	5	0.5	30	153	4	6	3	13	32766	80	10027	10059	9999	249	306	173	32	10	0	0	0	30	59	3	99	2	123	338	606	139
2016-05-30	204	severe pollution	82	147	16	1.1	51	283	4	10	2	16	32766	56	9990	10016	9960	264	343	180	44	33	0	0	0	18	42	10	69	10	119	342	586	165
2016-05-31	138	mild pollution	45	115	11	0.8	36	201	3	4	4	11	32766	72	10045	10071	9967	247	312	233	34	22	0	0	0	23	64	7	120	6	0	272	437	209
2016-06-01	108	mild pollution	37	73	6	0.7	42	168	4	4	4	12	32766	57	10085	10102	10061	246	293	178	28	20	0	0	0	15	38	11	64	11	61	323	581	157
2016-06-02	156	moderate pollution	53	88	9	0.8	51	221	5	4	3	12	32766	67	10056	10082	10022	258	321	162	29	18	0	0	0	19	51	10	88	11	109	335	608	131
2016-06-03	160	moderate pollution	82	125	21	1.2	61	225	6	7	4	17	32766	60	10023	10040	10005	254	298	188	39	24	0	0	0	18	39	10	73	10	50	316	583	163
2016-06-04	179	moderate pollution	87	127	16	0.9	38	244	4	7	4	15	32766	62	10021	10031	10008	261	310	217	43	27	0	0	0	23	43	10	72	10	86	325	565	201
2016-06-05	161	moderate pollution	71	98	14	0.9	38	226	4	10	3	17	32766	60	10057	10075	10032	243	303	192	55	32	0	0	0	18	46	7	78	8	99	328	566	175
2016-06-06	189	moderate pollution	87	119	7	0.9	32	254	5	8	2	15	32766	48	10054	10073	10026	246	306	188	59	34	0	0	0	18	34	10	63	12	81	332	566	178
2016-06-07	127	mild pollution	60	0	2	0.8	25	189	2	2	2	6	32766	44	10075	10096	10042	211	282	178	76	42	137	0	137	23	56	3	114	2	80	241	370	192
2016-06-08	170	moderate pollution	129	129	3	1.2	36	223	1	3	3	7	32766	34	10044	10068	10017	238	297	175	73	48	0	0	0	18	47	12	70	12	71	286	509	168
2016-06-09	153	moderate pollution	106	140	7	1	33	218	4	6	5	15	32766	67	10012	10042	9971	278	340	197	47	23	0	0	0	31	74	10	114	11	106	331	543	180
2016-06-10	123	mild pollution	52	32	2	0.6	20	185	1	3	1	5	32766	46	9993	10028	9955	252	316	202	64	26	108	25	133	25	68	1	169	1	90	268	416	184
2016-06-11	64	good	12	30	2	0.4	25	116	3	6	8	17	32766	69	10033	10048	9988	260	305	189	35	23	0	0	0	29	54	16	118	15	114	289	515	145
2016-06-12	146	mild pollution	71	100	7	1	33	210	4	8	5	17	32766	48	10025	10055	9987	254	310	197	55	28	0	0	0	23	38	11	63	10	69	293	506	181
2016-06-13	96	good	47	0	2	0.6	28	155	4	8	2	14	32766	40	9991	10012	9969	214	290	193	79	35	1	119	120	28	48	4	66	4	0	216	276	200
2016-06-14	50	perfect	35	44	2	0.6	26	95	4	6	4	14	32766	28	9956	9980	9935	189	222	174	86	63	15	19	34	20	57	5	91	5	7	193	271	175
2016-06-15	92	good	19	40	2	0.5	30	150	5	4	5	14	32766	43	9981	9997	9962	247	308	157	52	31	1	0	1	17	38	11	66	5	129	281	460	140
2016-06-16	90	good	26	59	2	0.6	47	148	3	5	2	10	32766	51	9946	9987	9907	271	351	181	47	20	0	0	0	20	46	10	69	11	120	316	534	167
2016-06-17	59	good	24	56	2	0.6	47	103	4	9	2	15	32766	67	9938	9972	9902	275	320	214	39	25	0	0	0	26	54	2	114	1	69	304	533	192
2016-06-18	145	mild pollution	42	72	4	0.7	44	209	4	6	1	11	32766	55	10003	10017	9967	271	317	216	50	36	0	0	0	21	53	10	84	12	119	332	548	196
2016-06-19	149	mild pollution	65	98	5	0.8	39	213	4	7	2	13	32766	56	10010	10029	9986	289	358	213	46	19	0	0	0	31	45	11	79	11	92	357	606	182
2016-06-20	166	moderate pollution	85	101	5	1	28	231	3	5	4	12	32766	53	9984	10000	9960	281	338	242	63	33	13	5	18	22	39	8	74	9	90	342	576	210
2016-06-21	175	moderate pollution	85	89	2	0.9	30	240	3	4	3	10	32766	45	9976	9995	9948	290	345	240	60	34	0	0	0	20	38	11	93	16	65	349	596	222
2016-06-22	150	mild pollution	56	85	2	0.7	32	214	3	8	4	15	32766	63	9981	10002	9950	277	333	227	59	35	0	0	0	21	43	4	76	5	57	348	586	229
2016-06-23	117	mild pollution	76	102	6	1.1	38	178	4	5	5	14	32766	49	9990	10012	9954	277	308	246	59	42	0	0	0	18	47	9	78	9	25	319	486	234
2016-06-24	70	good	13	30	2	0.6	30	123	4	6	3	13	32766	80	10016	10034	9989	284	342	183	30	15	0	0	0	26	81	1	152	1	124	341	604	157
2016-06-25	59	good	18	38	2	0.4	32	110	5	8	2	15	32766	105	10028	10050	10004	312	378	246	21	13	0	0	0	26	49	2	95	1	123	375	638	197
2016-06-26	140	mild pollution	41	77	5	0.5	42	203	4	7	3	14	32766	87	10012	10032	9992	308	376	226	29	15	0	0	0	26	73	12	121	12	84	368	623	197
2016-06-27	98	good	60	88	7	0.7	39	157	5	7	4	16	32766	58	9996	10008	9976	260	320	222	50	25	0	16	16	27	58	10	123	11	10	291	449	214
2016-06-28	98	good	73	0	2	0.7	32	118	4	9	7	20	32766	17	10015	10028	9987	215	226	182	82	67	228	11	239	17	42	7	74	15	5	223	262	187
2016-06-29	145	mild pollution	111	0	2	0.9	33	166	1	3	2	6	32766	22	10004	10026	9989	241	286	201	80	58	12	0	12	13	41	12	71	13	28	258	377	191
2016-06-30	130	mild pollution	60	57	2	0.7	33	192	3	4	3	10	32766	42	9990	10012	9972	263	329	211	71	37	19	0	19	14	40	9	64	10	81	288	438	202
2016-07-01	82	good	14	32	2	0.4	25	138	2	6	2	10	32766	64	9999	10012	9978	276	313	236	47	34	0	0	0	20	47	3	85	2	84	315	542	186
2016-07-02	119	mild pollution	47	71	3	0.7	38	180	1	5	2	8	32766	58	10009	10021	9992	275	333	209	59	31	0	0	0	21	45	11	78	11	139	333	545	187
2016-07-03	137	mild pollution	83	108	8	1	43	200	5	7	8	20	32766	45	10020	10034	10006	278	322	235	59	42	0	9	9	22	36	9	60	6	46	301	526	218
2016-07-04	173	moderate pollution	131	110	5	1.2	32	216	4	7	3	14	32766	43	10035	10047	10018	274	317	236	66	48	0	0	0	22	40	7	70	7	0	308	486	214
2016-07-05	161	moderate pollution	96	104	5	1	30	226	3	9	3	15	32766	56	10064	10079	10041	271	317	228	62	40	0	0	0	17	38	10	57	11	100	345	567	222
2016-07-06	155	moderate pollution	74	106	5	0.9	35	220	2	3	5	10	32766	67	10077	10092	10057	287	336	222	50	33	0	0	0	18	37	10	64	9	121	357	597	201
2016-07-07	177	moderate pollution	110	125	8	1.2	33	242	4	4	5	13	32766	60	10069	10086	10047	285	334	233	58	40	0	0	0	21	37	9	71	9	86	326	510	212
2016-07-08	146	mild pollution	91	104	5	1.2	34	210	5	4	3	12	32766	46	10045	10066	10013	280	330	238	71	44	0	0	0	20	32	5	55	7	21	329	494	240
2016-07-09	143	mild pollution	83	93	4	0.8	32	207	4	6	3	13	32766	51	10009	10030	9984	300	351	252	66	43	0	0	0	20	45	9	73	9	72	371	596	246
2016-07-10	137	mild pollution	91	86	4	0.8	28	200	4	7	2	13	32766	68	9986	10003	9962	309	359	255	60	39	0	0	0	20	53	10	82	10	114	389	622	245
2016-07-11	129	mild pollution	86	98	7	0.7	29	191	3	3	1	7	32766	68	9959	9984	9934	310	359	263	59	38	0	0	0	27	56	11	91	10	79	376	589	251
2016-07-12	52	good	29	54	4	0.6	29	94	3	7	2	12	32766	45	9959	9978	9935	278	325	253	66	47	0	5	5	20	43	1	85	1	20	276	382	259
2016-07-13	112	mild pollution	20	43	3	0.5	32	173	4	7	2	13	32766	59	10002	10013	9978	299	365	229	52	25	0	0	0	17	37	10	71	5	133	385	640	209
2016-07-14	80	good	35	0	4	0.8	42	135	3	8	3	14	32766	63	10023	10035	10001	285	329	258	51	30	0	0	0	19	49	13	75	13	16	312	510	244
2016-07-15	52	good	36	40	2	0.7	30	77	3	9	6	18	32766	31	10004	10033	9989	223	264	204	80	60	91	0	91	19	40	5	58	6	0	224	273	207
2016-07-16	54	good	38	53	3	0.8	40	82	3	7	2	12	32766	32	9993	10004	9983	243	276	213	63	45	0	0	0	11	27	14	42	14	0	262	406	197
2016-07-17	154	moderate pollution	79	97	3	1.1	42	219	4	5	2	11	32766	37	10026	10038	10004	266	313	231	61	43	0	0	0	13	28	11	47	10	47	296	465	217
2016-07-18	139	mild pollution	106	130	4	1.3	52	137	3	5	2	10	32766	24	10034	10046	10022	258	293	238	75	58	0	25	25	10	45	13	74	13	8	275	448	221
2016-07-19	133	mild pollution	101	0	2	1.3	44	53	4	5	3	12	32766	23	10034	10037	10025	242	260	232	88	68	0	135	135	19	32	5	55	5	0	237	259	226
2016-07-20	48	perfect	33	7	2	0.7	18	57	7	6	3	16	32766	10	9978	10040	9934	221	243	213	94	76	367	2168	2535	39	82	4	142	5	0	217	235	210
2016-07-21	40	perfect	28	39	2	0.8	27	53	6	7	3	16	32766	9	9966	9974	9952	241	263	220	91	83	294	147	441	16	36	2	54	2	0	260	333	218
2016-07-22	100	good	75	81	2	1.1	32	154	3	8	2	13	32766	17	9971	9979	9957	268	306	235	84	67	0	0	0	18	30	10	48	9	40	276	374	229
2016-07-23	158	moderate pollution	120	174	2	1.2	34	180	2	4	2	8	32766	21	9970	9978	9956	297	337	263	80	62	0	0	0	14	33	9	56	9	20	303	392	252
2016-07-24	131	mild pollution	73	118	3	0.9	34	194	1	3	1	5	32766	37	10000	10012	9978	283	337	254	80	63	0	0	0	14	44	3	77	9	16	296	410	247
2016-07-25	57	good	40	38	3	0.8	29	108	2	5	2	9	32766	32	9983	10019	9960	279	332	246	85	56	127	0	127	14	30	11	52	10	19	288	393	248
2016-07-26	93	good	21	48	3	0.6	24	151	4	6	3	13	32766	56	9998	10015	9973	287	329	226	61	41	0	0	0	24	40	3	75	3	133	293	416	212
2016-07-27	168	moderate pollution	47	0	2	0.7	35	233	6	8	4	18	32766	42	9983	9996	9955	281	344	248	72	50	0	0	0	26	68	15	142	1	102	294	414	229
2016-07-28	128	mild pollution	50	81	2	0.7	31	190	5	10	2	17	32766	37	9977	10010	9962	277	328	225	74	59	74	0	74	15	59	16	103	16	64	296	398	217
2016-07-29	158	moderate pollution	120	139	2	1.3	30	217	2	4	2	8	32766	32	10003	10019	9972	294	333	269	77	62	0	0	0	14	33	6	50	5	49	301	397	250
2016-07-30	170	moderate pollution	129	48	2	1.6	32	87	2	3	2	7	32766	31	10037	10053	10006	283	315	266	81	58	0	1	1	15	46	10	88	5	0	290	370	249
2016-07-31	77	good	56	82	2	1	32	102	3	3	1	7	32766	34	10048	10071	10034	256	288	234	82	68	0	0	0	23	48	5	73	5	5	263	364	224
2016-08-01	109	mild pollution	71	100	3	1.3	30	169	5	11	4	20	32766	21	10051	10061	10033	283	317	259	76	60	0	1	1	14	26	10	38	10	40	291	387	244
2016-08-02	96	good	49	58	2	1	31	155	7	10	4	21	32766	43	10055	10068	10038	291	332	251	69	49	0	0	0	14	40	3	64	5	110	305	416	239
2016-08-03	153	moderate pollution	59	80	3	1	35	218	5	9	3	17	32766	41	10056	10068	10038	302	346	251	67	42	0	0	0	15	28	6	45	11	102	331	481	232
2016-08-04	155	moderate pollution	101	114	2	1.4	33	220	5	8	5	18	32766	43	10057	10070	10043	298	330	265	72	60	0	0	0	16	34	10	62	9	55	336	489	248
2016-08-05	103	mild pollution	66	88	3	0.8	29	163	4	1	8	13	32766	48	10056	10071	10036	288	330	254	74	51	0	0	0	14	37	10	58	10	53	332	537	241
2016-08-06	129	mild pollution	98	96	2	1	32	162	4	3	3	10	32766	36	10020	10046	9994	296	327	264	77	58	0	0	0	18	38	10	57	9	13	334	468	252
2016-08-07	69	good	20	34	2	0.6	19	122	5	3	2	10	32766	43	10037	10058	10003	272	313	236	71	48	0	29	29	23	45	6	84	7	59	285	410	242
2016-08-08	95	good	32	48	3	0.8	26	154	6	8	4	18	32766	61	10058	10067	10041	280	321	236	67	36	0	0	0	18	38	5	65	1	114	338	534	219
2016-08-09	135	mild pollution	46	70	6	1.2	37	198	5	5	3	13	32766	48	10044	10060	10023	275	314	218	66	43	0	0	0	20	34	10	56	11	120	327	562	205
2016-08-10	112	mild pollution	84	97	3	0.9	27	158	4	7	4	15	32766	40	10029	10041	10010	293	335	258	76	57	0	0	0	24	53	11	79	11	94	354	535	244
2016-08-11	114	mild pollution	86	100	3	0.9	29	156	4	8	4	16	32766	41	10023	10035	10012	307	342	269	74	60	0	0	0	29	43	11	66	10	63	361	558	263
2016-08-12	79	good	58	73	4	0.9	38	72	4	6	3	13	32766	24	10016	10023	9999	279	334	247	86	62	0	502	502	22	59	1	99	1	4	294	476	250
2016-08-13	50	perfect	22	35	3	0.7	40	45	4	5	2	11	32766	28	10015	10029	10005	279	326	252	72	42	0	0	0	14	35	1	69	2	14	278	368	240
2016-08-14	104	mild pollution	22	48	3	0.6	38	164	4	8	5	17	32766	43	10021	10032	10012	289	327	232	50	36	0	0	0	16	29	3	47	1	54	276	376	208
2016-08-15	45	perfect	20	42	2	0.6	29	89	4	6	4	14	32766	35	10042	10065	10020	248	290	218	73	51	54	0	54	20	36	13	56	13	36	254	324	221
2016-08-16	96	good	24	41	2	0.6	32	155	2	4	3	9	32766	39	10017	10040	9994	259	313	196	69	50	0	0	0	16	38	11	64	11	121	273	398	184
2016-08-17	87	good	64	0	3	1	58	47	2	4	2	8	32766	22	10002	10014	9987	257	278	237	77	65	0	0	0	13	28	3	39	11	0	252	303	222
2016-08-18	99	good	74	0	2	1.6	42	43	3	6	4	13	32766	17	9977	10005	9964	238	253	227	94	86	23	156	179	17	28	3	55	3	0	237	249	227
2016-08-19	67	good	19	42	2	0.9	25	120	1	5	4	10	32766	42	10013	10038	9981	273	328	228	68	43	1	0	1	26	58	3	90	4	92	278	386	221
2016-08-20	134	mild pollution	54	70	2	1	38	197	1	5	3	9	32766	29	10048	10062	10027	273	315	232	71	53	0	0	0	9	29	10	46	9	73	280	391	217
2016-08-21	179	moderate pollution	54	74	3	1	40	244	2	6	3	11	32766	35	10053	10064	10036	287	333	235	68	49	0	0	0	17	33	11	53	11	105	287	411	219
2016-08-22	103	mild pollution	50	66	4	0.9	32	163	2	3	3	8	32766	50	10075	10092	10056	283	326	240	62	41	0	0	0	18	41	11	64	12	90	281	394	223
2016-08-23	95	good	71	91	6	0.9	42	135	3	4	2	9	32766	39	10033	10065	10006	271	301	243	69	50	0	3	3	13	30	10	47	10	27	270	390	219
2016-08-24	109	mild pollution	82	110	3	1.1	48	133	3	6	3	12	32766	25	10006	10020	9990	278	299	247	70	58	0	0	0	12	20	2	28	2	0	278	342	228
2016-08-25	34	perfect	17	23	2	0.4	24	67	4	6	3	13	32766	86	10062	10110	9994	272	293	240	45	24	0	0	0	28	75	2	143	1	54	278	426	197
2016-08-26	45	perfect	11	29	2	0.4	33	90	3	8	2	13	32766	55	10125	10146	10101	240	301	160	37	20	0	0	0	17	35	2	61	1	125	274	486	127
2016-08-27	48	perfect	15	39	3	0.4	38	81	3	8	2	13	32766	57	10089	10109	10057	248	326	170	43	15	0	0	0	20	86	1	194	2	115	289	512	147
2016-08-28	46	perfect	12	32	2	0.3	34	92	1	3	2	6	32766	58	10081	10101	10060	257	326	178	37	18	0	0	0	19	42	3	72	3	125	297	514	143
2016-08-29	66	good	19	47	3	0.5	45	119	2	8	5	15	32766	56	10078	10096	10067	254	308	184	44	24	0	0	0	20	48	5	79	6	93	306	515	157
2016-08-30	109	mild pollution	30	65	3	0.6	48	169	2	7	5	14	32766	48	10023	10076	9976	265	325	209	49	28	0	0	0	21	54	13	83	13	113	320	524	197
2016-08-31	50	perfect	16	37	3	0.5	40	88	4	4	2	10	32766	73	9933	9980	9897	276	341	181	36	11	0	0	0	23	51	2	105	1	123	311	531	159
2016-09-01	39	perfect	8	31	3	0.3	31	72	4	4	3	11	32766	65	9926	9954	9903	245	297	213	32	10	0	0	0	18	68	1	169	1	0	268	390	174
2016-09-02	39	perfect	12	34	2	0.4	31	56	4	4	5	13	32766	39	9984	10007	9953	243	288	208	51	34	0	0	0	21	34	2	68	3	43	269	530	198
2016-09-03	86	good	21	45	2	0.5	35	143	4	6	4	14	32766	35	10033	10042	10007	252	302	192	60	41	0	0	0	15	34	10	50	11	118	306	527	171
2016-09-04	106	mild pollution	79	0	5	1	44	166	4	6	2	12	32766	37	10057	10069	10039	252	295	214	67	45	0	0	0	18	38	10	63	11	79	288	507	207
2016-09-05	54	good	28	58	2	0.5	33	94	5	4	2	11	32766	48	10064	10077	10044	257	320	195	56	28	0	0	0	22	47	14	79	14	114	318	556	180
2016-09-06	0	无	0	0	0	0	0	0	3	4	3	10	32766	42	10046	10061	10025	262	316	206	54	23	0	0	0	20	32	2	59	15	79	289	525	185
2016-09-07	87	good	40	65	5	0.7	41	144	4	9	3	16	32766	42	10028	10041	10001	232	297	198	68	38	2	90	92	18	59	15	130	15	79	295	536	196
2016-09-08	55	good	23	46	2	0.6	44	105	4	6	4	14	32766	36	10028	10042	10012	235	313	166	63	25	13	0	13	12	41	11	71	13	96	235	375	151
2016-09-09	53	good	18	39	3	0.5	42	68	4	5	2	11	32766	50	10044	10055	10030	250	314	181	49	24	0	0	0	17	40	1	71	1	118	273	466	148
2016-09-10	54	good	17	44	3	0.5	43	92	0	1	0	1	32766	49	10060	10077	10045	249	303	189	47	29	0	0	0	16	36	3	57	3	101	269	497	154
2016-09-11	65	good	32	48	2	0.8	29	117	3	5	4	12	32766	37	10094	10116	10063	215	256	178	72	52	35	0	35	24	63	3	117	3	57	236	342	179
2016-09-12	72	good	34	51	2	0.8	38	126	1	6	5	12	32766	31	10133	10146	10116	223	271	170	67	47	0	0	0	13	30	10	48	5	98	242	457	147
2016-09-13	118	mild pollution	89	98	3	1.1	53	137	2	4	4	10	32766	25	10138	10154	10120	233	278	192	71	52	0	0	0	14	34	11	57	10	41	255	440	175
2016-09-14	130	mild pollution	99	102	4	1.1	50	174	4	7	3	14	32766	26	10124	10140	10098	247	295	194	70	46	0	0	0	21	44	12	69	10	78	288	460	174
2016-09-15	111	mild pollution	79	100	4	0.9	42	172	3	6	2	11	32766	32	10104	10119	10084	256	307	204	64	40	0	0	0	16	31	10	57	11	92	304	500	187
2016-09-16	172	moderate pollution	130	125	4	1.1	39	187	3	6	2	11	32766	28	10086	10098	10063	254	304	213	68	42	0	0	0	20	65	3	111	4	8	287	438	197
2016-09-17	57	good	40	0	2	0.8	37	49	3	7	4	14	32766	35	10137	10150	10080	222	247	209	69	49	0	0	0	17	38	4	60	4	0	230	296	202
2016-09-18	42	perfect	23	22	2	0.6	33	18	2	8	3	13	32766	21	10162	10170	10149	191	223	179	81	62	102	0	102	14	43	3	68	1	4	195	291	157
2016-09-19	44	perfect	12	29	2	0.4	35	74	1	4	4	9	32766	45	10178	10200	10156	197	253	147	52	28	0	0	0	19	42	2	70	2	115	218	402	110
2016-09-20	59	good	21	44	3	0.5	47	95	5	6	5	16	32766	41	10163	10183	10143	200	267	133	54	25	0	0	0	14	33	10	54	10	110	232	447	99
2016-09-21	97	good	68	117	5	1	77	44	3	5	4	12	32766	23	10152	10172	10136	196	237	161	61	40	0	0	0	10	19	10	36	9	13	202	356	135
2016-09-22	137	mild pollution	104	129	7	1.1	59	113	2	3	2	7	32766	24	10112	10147	10082	202	251	154	71	50	0	0	0	12	28	4	50	5	34	226	406	129
2016-09-23	168	moderate pollution	127	172	3	1.2	49	182	4	4	4	12	32766	24	10079	10108	10058	215	267	172	78	53	49	0	49	12	49	14	95	13	80	238	373	152
2016-09-24	156	moderate pollution	119	203	4	1.1	54	174	4	5	2	11	32766	25	10064	10088	10040	228	272	178	73	56	37	0	37	15	30	5	49	2	72	239	339	166
2016-09-25	211	severe pollution	161	193	4	1.5	49	96	3	3	1	7	32766	23	10097	10118	10057	230	274	205	76	57	0	0	0	19	44	4	75	4	17	234	351	185
2016-09-26	80	good	59	109	2	1.2	46	61	3	4	2	9	32766	13	10100	10116	10079	198	234	183	90	74	247	15	262	11	37	14	70	6	0	201	247	178
2016-09-27	33	perfect	23	29	2	0.6	24	59	2	3	2	7	32766	80	10163	10214	10094	182	209	161	50	28	0	0	0	37	76	1	156	1	78	160	256	112
2016-09-28	50	perfect	16	38	3	0.4	40	58	3	5	2	10	32766	50	10221	10253	10185	157	210	116	37	22	0	0	0	21	45	4	85	2	110	163	328	58
2016-09-29	75	good	53	90	5	0.7	60	95	1	4	1	6	32766	33	10156	10197	10123	155	214	84	56	30	0	0	0	14	41	11	72	10	88	169	324	54
2016-09-30	135	mild pollution	103	138	7	0.9	76	145	2	3	2	7	32766	26	10115	10135	10091	184	241	121	55	36	0	0	0	17	33	10	56	11	93	193	347	96
2016-10-01	220	severe pollution	170	202	11	1.3	86	118	4	5	3	12	32766	31	10107	10118	10093	187	243	139	64	32	0	0	0	13	34	10	54	10	60	190	339	114
2016-10-02	233	severe pollution	183	201	6	1.4	72	132	3	3	2	8	32766	19	10090	10119	10059	197	250	145	70	49	0	0	0	10	26	3	43	1	38	210	343	122
2016-10-03	159	moderate pollution	121	140	3	1.1	58	132	3	5	2	10	32766	19	10069	10090	10046	217	284	183	73	38	0	0	0	15	32	5	48	9	82	237	398	163
2016-10-04	47	perfect	31	44	3	1.1	37	34	5	7	3	15	32766	33	10110	10129	10080	173	227	145	76	61	0	64	64	40	66	6	121	7	0	167	206	145
2016-10-05	83	good	61	91	2	1.2	42	57	5	5	5	15	32766	22	10145	10160	10119	167	212	130	78	58	0	0	0	15	36	11	61	9	60	185	298	108
2016-10-06	95	good	71	0	4	1.6	48	11	3	9	3	15	32766	0	10210	10234	10160	159	184	139	85	72	0	123	123	22	36	4	58	4	0	161	244	119
2016-10-07	55	good	39	17	2	1.6	43	15	3	2	1	6	32766	8	10155	10214	10119	134	158	120	93	88	177	76	253	22	38	7	64	8	0	136	175	124
2016-10-08	33	perfect	13	29	2	0.5	26	60	5	5	4	14	32766	48	10181	10201	10136	131	176	86	40	23	0	0	0	27	50	16	96	16	108	118	227	43
2016-10-09	67	good	33	64	4	0.7	53	33	3	4	3	10	32766	24	10193	10216	10166	109	176	51	62	25	0	0	0	14	51	12	79	10	63	99	204	35
2016-10-10	122	mild pollution	92	127	10	1.2	79	31	2	5	2	9	32766	19	10143	10172	10111	116	187	61	74	45	0	0	0	13	33	10	55	9	56	121	250	43
2016-10-11	149	mild pollution	114	130	8	1.4	65	62	3	4	3	10	32766	18	10175	10200	10124	136	182	84	75	61	0	0	0	21	46	5	70	4	91	137	242	56
2016-10-12	107	mild pollution	80	102	6	1.2	64	51	2	4	2	8	32766	20	10203	10236	10173	149	186	121	69	56	0	0	0	14	33	10	51	11	18	148	252	107
2016-10-13	206	severe pollution	156	189	5	1.6	75	78	4	7	4	15	32766	14	10157	10184	10135	153	213	100	82	58	0	0	0	9	24	12	41	11	45	153	264	81
2016-10-14	292	severe pollution	242	258	6	2	93	73	3	3	2	8	32766	12	10167	10184	10147	162	225	123	83	52	0	0	0	11	29	9	45	10	36	160	255	102
2016-10-15	236	severe pollution	186	226	4	1.9	88	4	4	8	4	16	32766	10	10184	10199	10171	147	172	108	84	70	0	0	0	9	27	10	38	10	0	134	174	84
2016-10-16	153	moderate pollution	117	137	3	1	58	55	2	4	2	8	32766	12	10146	10186	10116	162	199	141	82	61	3	0	3	18	37	11	55	11	9	164	265	135
2016-10-17	85	good	63	101	2	0.9	53	61	10	11	5	26	32766	26	10166	10191	10129	162	225	103	67	26	0	0	0	18	33	4	54	4	92	156	284	64
2016-10-18	160	moderate pollution	122	158	6	1.8	72	10	7	7	4	18	32766	11	10162	10184	10137	160	181	137	84	58	0	0	0	15	35	9	66	9	0	161	219	114
2016-10-19	278	severe pollution	228	228	5	2.3	83	38	4	6	2	12	32766	7	10127	10146	10109	163	194	149	90	75	0	0	0	10	23	11	35	11	0	163	235	133
2016-10-20	115	mild pollution	87	0	6	1.4	54	27	3	3	3	9	32766	27	10180	10202	10132	137	168	104	71	46	0	37	37	18	65	6	123	6	0	124	152	103
2016-10-21	60	good	43	0	2	0.8	39	33	2	6	3	11	32766	12	10157	10192	10129	106	111	98	87	74	6	57	63	12	23	2	45	1	0	109	125	102
2016-10-22	38	perfect	15	25	2	0.6	30	36	3	4	2	9	32766	28	10187	10209	10142	120	143	104	71	47	13	0	13	26	64	4	92	4	8	115	206	71
2016-10-23	55	good	28	52	4	0.6	44	38	7	9	7	23	32766	21	10194	10217	10166	109	159	63	54	27	0	0	0	9	23	2	44	3	94	125	258	42
2016-10-24	87	good	64	113	3	1.2	58	4	9	10	4	23	32766	14	10137	10177	10104	98	119	77	79	53	0	1	1	12	24	9	35	9	0	92	147	55
2016-10-25	133	mild pollution	101	135	3	1.5	74	8	7	10	5	22	32766	12	10106	10120	10083	111	181	55	83	54	0	0	0	9	36	11	62	11	73	109	250	28
2016-10-26	69	good	42	88	4	0.8	50	46	3	4	2	9	32766	28	10196	10237	10117	127	172	97	57	24	0	0	0	19	46	10	79	2	48	128	258	67
2016-10-27	63	good	30	66	5	1	50	11	2	6	3	11	32766	21	10234	10251	10208	90	116	74	73	55	0	137	137	16	31	2	61	1	0	87	114	77
2016-10-28	38	perfect	11	29	2	0.4	30	58	1	3	3	7	32766	35	10257	10285	10224	99	129	58	40	18	7	0	7	23	54	1	109	16	92	83	186	16
2016-10-29	59	good	26	62	4	0.6	47	42	2	2	3	7	32766	26	10272	10305	10236	66	127	3	55	24	0	0	0	26	62	12	107	12	75	48	189	-18
2016-10-30	66	good	44	81	5	0.8	42	54	7	5	2	14	32766	21	10221	10272	10195	68	113	15	54	26	0	0	0	31	62	1	126	16	0	39	136	-10
2016-10-31	29	perfect	9	25	4	0.3	19	57	4	7	3	14	32766	50	10335	10367	10271	31	83	-2	20	12	0	0	0	44	73	2	135	3	90	40	191	-29
2016-11-01	69	good	45	74	9	0.7	55	37	2	5	3	10	24	32766	10305	10337	10266	23	82	-40	51	28	0	0	0	13	52	13	82	13	83	23	180	-56
2016-11-02	140	mild pollution	107	149	10	1.5	82	23	1	5	2	8	25	32766	10223	10274	10194	53	124	-9	59	36	0	0	0	12	34	12	53	11	93	48	196	-26
2016-11-03	243	severe pollution	193	241	9	2.6	104	11	1	5	5	11	15	32766	10148	10205	10106	52	108	5	81	53	0	0	0	15	30	11	44	13	59	49	186	-19
2016-11-04	292	severe pollution	242	271	6	3.4	119	12	1	7	5	13	13	32766	10058	10115	10023	60	109	24	89	66	0	0	0	9	23	5	33	5	45	67	200	-8
2016-11-05	230	severe pollution	180	203	5	3.1	95	36	5	10	4	19	21	32766	10105	10191	10037	88	159	58	80	47	0	0	0	14	52	6	94	6	57	101	231	57
2016-11-06	95	good	71	97	10	1.2	56	40	6	8	10	24	31	32766	10235	10259	10191	72	99	52	52	32	0	0	0	10	32	9	65	13	51	74	212	13
2016-11-07	53	good	37	43	3	0.8	39	50	7	11	5	23	35	32766	10258	10296	10216	81	126	50	55	25	4	0	4	27	54	1	112	15	80	88	237	13
2016-11-08	67	good	39	71	7	0.8	53	36	5	9	10	24	34	32766	10302	10323	10279	55	117	-14	51	27	0	0	0	15	40	11	73	10	90	47	220	-34
2016-11-09	208	severe pollution	158	194	14	2.5	86	5	3	5	3	11	7	32766	10257	10303	10207	35	77	2	77	50	0	0	0	13	21	8	33	7	0	29	113	-25
2016-11-10	199	moderate pollution	149	178	8	1.8	70	15	5	5	2	12	11	32766	10116	10207	10071	63	100	44	77	61	0	6	6	12	31	9	52	8	16	48	151	3
2016-11-11	110	mild pollution	83	124	7	1.7	65	16	5	8	3	16	13	32766	10105	10116	10084	47	91	10	74	45	0	0	0	14	41	4	68	3	21	38	140	-16
2016-11-12	100	good	75	124	10	1.5	66	28	8	7	2	17	21	32766	10160	10179	10116	70	132	6	67	43	0	0	0	14	31	9	50	8	77	59	207	-23
2016-11-13	132	mild pollution	100	165	11	2.3	72	4	8	7	2	17	14	32766	10140	10174	10103	78	98	67	78	64	0	0	0	12	25	6	41	6	0	75	130	45
2016-11-14	62	good	39	73	4	0.9	35	61	5	7	4	16	58	32766	10177	10217	10112	98	135	49	32	9	0	0	0	34	73	16	135	1	75	79	228	6
2016-11-15	79	good	45	84	13	1.5	63	23	2	3	1	6	27	32766	10223	10251	10186	43	109	-15	47	15	0	0	0	15	31	11	57	10	78	35	202	-40
2016-11-16	132	mild pollution	100	147	16	2.2	80	21	8	13	6	27	19	32766	10171	10190	10153	57	117	22	70	34	0	0	0	11	34	3	47	3	64	46	188	-13
2016-11-17	149	mild pollution	114	165	22	2.5	70	6	7	7	4	18	16	32766	10196	10221	10169	59	65	37	69	53	0	0	0	11	31	5	51	5	0	45	77	-7
2016-11-18	242	severe pollution	192	280	19	3.7	87	3	9	8	4	21	8	32766	10113	10174	10086	67	74	63	79	61	0	0	0	12	22	4	33	4	0	62	84	53
2016-11-19	165	moderate pollution	125	133	9	1.8	65	49	7	5	2	14	28	32766	10138	10185	10091	102	165	51	60	14	2	0	2	23	43	11	82	15	66	94	236	26
2016-11-20	70	good	51	0	4	1.1	41	25	5	7	1	13	12	32766	10215	10228	10185	41	92	25	81	69	0	4	4	23	49	4	71	4	0	44	75	27
2016-11-21	30	perfect	10	21	3	0.4	15	60	4	4	2	10	26	32766	10269	10330	10208	-14	25	-30	62	30	62	4	66	53	74	1	128	1	0	-1	29	-14
2016-11-22	28	perfect	8	21	4	0.4	21	55	4	4	2	10	33	32766	10353	10377	10326	-36	-2	-66	29	23	0	0	0	38	75	16	131	1	86	-34	33	-69
2016-11-23	44	perfect	19	33	8	0.6	35	43	7	7	4	18	15	32766	10317	10355	10281	-15	26	-53	39	27	0	0	0	27	43	1	71	1	78	-24	70	-69
2016-11-24	102	mild pollution	76	107	18	1.5	70	25	9	5	2	16	12	32766	10259	10304	10219	-12	44	-60	49	27	0	0	0	14	32	11	57	15	83	-25	63	-70
2016-11-25	214	severe pollution	164	205	24	2.6	97	8	9	5	2	16	10	32766	10214	10232	10196	3	53	-49	60	36	0	0	0	15	26	10	41	10	73	-11	85	-59
2016-11-26	315	gross pollution	265	361	22	3.5	117	13	5	10	5	20	9	32766	10171	10214	10148	18	78	-21	71	39	0	0	0	11	33	10	48	9	35	9	96	-35
2016-11-27	68	good	49	80	7	0.9	45	58	3	8	5	16	42	32766	10233	10280	10158	32	75	-15	40	16	0	0	0	24	52	1	103	4	85	3	102	-36
2016-11-28	97	good	63	101	18	1.7	77	16	5	7	7	19	14	32766	10284	10298	10261	12	84	-44	49	24	0	0	0	14	34	12	53	11	72	-4	112	-55
2016-11-29	129	mild pollution	98	146	26	2.6	81	4	5	8	2	15	8	32766	10298	10326	10276	12	44	-25	67	50	0	0	0	14	27	4	44	5	9	-6	47	-49
2016-11-30	117	mild pollution	88	128	15	2.1	67	53	8	7	5	20	12	32766	10211	10276	10174	46	99	-10	59	24	0	0	0	12	57	15	110	13	68	27	144	-34
2016-12-01	60	good	33	56	9	0.8	48	57	5	8	4	17	38	32766	10279	10305	10219	55	103	4	32	17	0	0	0	15	37	14	65	16	86	17	184	-50
2016-12-02	129	mild pollution	98	131	19	2.1	85	17	2	8	3	13	15	32766	10258	10292	10223	27	101	-28	54	27	0	0	0	14	22	11	37	11	83	8	165	-56
2016-12-03	259	severe pollution	209	272	24	3.4	113	10	13	14	7	34	9	32766	10174	10233	10143	23	79	-23	69	46	0	0	0	10	20	4	31	4	56	6	122	-44
2016-12-04	302	gross pollution	252	284	18	3.6	104	17	8	9	8	25	9	32766	10131	10152	10108	29	106	-24	75	28	0	0	0	8	30	7	55	6	20	15	128	-42
2016-12-05	60	good	43	50	8	1	43	61	16	13	7	36	30	32766	10235	10275	10152	24	66	-5	46	12	0	0	0	21	69	16	126	15	79	6	133	-49
2016-12-06	112	mild pollution	84	128	21	2.3	92	11	18	17	7	42	11	32766	10197	10277	10141	-2	63	-54	44	22	0	0	0	9	27	10	47	11	63	-11	115	-77
2016-12-07	170	moderate pollution	129	169	23	2.7	100	15	13	19	7	39	13	32766	10196	10230	10165	27	83	-24	52	39	0	0	0	19	39	11	59	11	71	-1	138	-55
2016-12-08	114	mild pollution	86	119	11	1.7	53	66	13	21	6	40	40	32766	10144	10186	10110	37	91	-7	53	16	0	0	0	32	80	1	153	1	77	19	146	-36
2016-12-09	54	good	25	45	9	0.8	43	48	10	17	6	33	29	32766	10243	10262	10185	11	47	-6	36	23	0	0	0	20	42	2	75	3	63	-2	132	-51
2016-12-10	80	good	49	74	14	1.4	64	24	11	15	13	39	12	32766	10256	10273	10235	-8	63	-61	50	23	0	0	0	11	23	11	54	10	82	-18	137	-76
2016-12-11	219	severe pollution	169	204	35	3.5	101	8	14	28	13	55	7	32766	10214	10258	10175	-5	41	-50	65	50	0	0	0	14	30	10	49	10	40	-13	80	-64
2016-12-12	271	severe pollution	221	240	39	3	103	15	10	23	6	39	15	32766	10203	10243	10178	29	65	11	63	46	0	0	0	15	36	4	53	4	7	15	98	-26
2016-12-13	68	good	49	32	9	1.2	50	43	12	24	10	46	16	32766	10271	10285	10243	5	33	-19	51	27	0	0	0	19	37	3	75	3	0	-18	52	-56
2016-12-14	58	good	28	51	11	0.8	46	43	10	25	7	42	22	32766	10297	10328	10265	-14	31	-49	30	19	0	0	0	25	40	2	74	3	83	-22	116	-81
2016-12-15	54	good	27	53	10	0.9	43	59	9	18	12	39	25	32766	10287	10310	10259	4	53	-64	35	17	0	0	0	24	55	1	110	1	82	-18	122	-80
2016-12-16	149	mild pollution	114	149	22	2.2	92	14	8	18	15	41	6	32766	10230	10300	10185	-4	64	-56	56	28	0	0	0	14	32	10	46	10	59	-25	122	-85
2016-12-17	246	severe pollution	196	224	32	3.3	104	11	12	15	13	40	8	32766	10185	10199	10170	1	53	-46	65	46	0	0	0	16	25	4	38	4	0	-32	114	-78
2016-12-18	271	severe pollution	221	239	25	3.5	102	14	14	16	9	39	5	32766	10201	10215	10182	-2	73	-44	76	45	0	0	0	9	19	4	25	4	65	-22	114	-73
2016-12-19	273	severe pollution	223	253	22	4.1	111	14	13	19	3	35	12	32766	10209	10223	10195	4	85	-47	75	37	0	0	0	8	22	11	30	14	54	-19	139	-77
2016-12-20	418	gross pollution	376	415	8	8	135	6	17	32	12	61	3	32766	10251	10268	10216	-20	5	-44	91	75	0	0	0	11	26	4	37	11	0	-6	59	-67
2016-12-21	431	gross pollution	396	415	12	8	155	9	13	24	7	44	3	32766	10223	10266	10194	8	41	-16	83	66	0	0	0	13	27	10	40	11	0	5	81	-32
2016-12-22	79	good	58	57	6	1.3	35	59	15	24	13	52	34	32766	10197	10218	10175	26	60	-18	44	24	0	0	0	36	59	16	111	16	86	4	142	-62
2016-12-23	62	good	34	65	9	0.8	49	39	29	42	13	84	23	32766	10262	10288	10218	-13	44	-48	41	27	0	0	0	18	45	2	70	3	83	-19	126	-78
2016-12-24	160	moderate pollution	122	152	26	2.7	90	10	26	36	10	72	10	32766	10266	10282	10244	-9	44	-53	56	35	0	0	0	16	33	10	48	10	69	-19	95	-72
2016-12-25	195	moderate pollution	146	168	30	2.8	96	5	21	30	7	58	8	32766	10250	10273	10230	-10	18	-37	66	57	0	0	0	16	23	3	34	3	0	-20	26	-63
2016-12-26	59	good	41	45	15	0.9	47	50	16	33	9	58	19	32766	10270	10292	10245	13	43	-16	41	22	0	0	0	17	49	4	71	4	36	0	110	-73
2016-12-27	59	good	42	63	9	0.9	45	51	15	26	12	53	16	32766	10306	10339	10289	-17	34	-64	37	22	0	0	0	21	45	1	76	16	81	-26	126	-99
2016-12-28	87	good	64	64	10	1.1	42	45	16	37	9	62	22	32766	10288	10321	10262	-21	21	-53	51	18	0	0	0	30	64	1	120	16	70	-26	103	-85
2016-12-29	88	good	65	94	12	1.1	53	31	6	16	7	29	18	32766	10316	10339	10290	-27	19	-71	38	22	0	0	0	21	41	1	82	1	78	-46	109	-124
2016-12-30	262	severe pollution	212	255	19	3.3	100	8	8	19	8	35	4	32766	10259	10296	10233	-37	13	-82	74	49	0	0	0	12	27	11	44	11	23	-50	92	-114
2016-12-31	351	gross pollution	301	356	21	4.6	129	8	16	21	8	45	4	32766	10234	10250	10218	-39	24	-71	80	52	0	0	0	12	27	11	40	11	52	-50	82	-105
2017-01-01	470	gross pollution	454	516	8	6.8	141	6	19	31	12	62	4	32766	10216	10235	10192	-40	-15	-58	90	79	0	0	0	13	30	11	42	11	0	-26	57	-69
2017-01-02	248	severe pollution	198	332	13	3.8	102	38	32	45	16	93	5	32766	10220	10244	10206	-26	41	-80	77	48	0	0	0	19	40	11	58	11	57	-27	118	-112
2017-01-03	348	gross pollution	298	386	17	6	144	17	36	48	16	100	5	32766	10190	10215	10167	-20	41	-57	82	51	0	0	0	11	32	10	45	11	56	-41	99	-101
2017-01-04	389	gross pollution	339	435	18	7.5	150	13	37	50	20	107	5	32766	10220	10234	10198	-15	40	-53	85	57	0	0	0	12	26	11	39	12	26	-12	121	-80
2017-01-05	270	severe pollution	220	303	16	5.3	109	11	29	43	15	87	4	32766	10265	10290	10234	9	36	-28	76	51	0	0	0	17	31	4	48	2	0	-1	92	-56
2017-01-06	248	severe pollution	198	199	25	4.3	108	14	20	27	10	57	5	32766	10234	10268	10209	1	55	-46	73	50	0	0	0	11	22	11	39	10	47	-4	134	-83
2017-01-07	220	severe pollution	170	239	19	3.3	84	11	23	33	16	72	7	32766	10202	10217	10191	17	40	13	80	56	0	2	2	15	38	4	48	4	0	0	76	-9
2017-01-08	50	perfect	35	51	10	1	35	54	32	43	15	90	18	32766	10185	10208	10158	14	64	-14	65	30	0	0	0	17	41	1	71	15	72	-5	160	-71
2017-01-09	50	perfect	35	43	7	0.8	39	47	35	53	18	106	33	32766	10221	10253	10184	8	42	-15	38	25	0	0	0	35	66	16	123	1	85	0	163	-74
2017-01-10	42	perfect	23	41	7	0.7	34	61	29	34	12	75	28	32766	10251	10280	10195	10	47	-16	28	14	0	0	0	29	60	14	110	14	70	-15	132	-83
2017-01-11	95	good	59	87	19	1.7	76	19	21	33	16	70	10	32766	10215	10259	10182	-11	67	-63	50	24	0	0	0	14	28	11	38	10	84	-33	166	-110
2017-01-12	63	good	42	62	13	1	51	46	24	38	10	72	18	32766	10170	10201	10139	4	56	-27	40	26	0	0	0	21	45	11	73	12	68	-32	143	-99
2017-01-13	34	perfect	8	21	5	0.4	22	69	11	28	9	48	35	32766	10211	10236	10149	4	41	-35	21	12	0	0	0	37	52	16	107	16	87	-9	143	-117
2017-01-14	56	good	19	39	11	0.9	45	52	10	28	5	43	25	32766	10285	10305	10235	-22	30	-64	28	12	0	0	0	17	44	1	77	1	80	-38	161	-129
2017-01-15	71	good	52	69	11	1	49	31	15	26	12	53	11	32766	10296	10334	10262	-35	-6	-51	67	46	0	0	0	15	35	10	65	10	30	-37	103	-98
2017-01-16	121	mild pollution	92	108	18	1.8	67	8	19	28	13	60	7	32766	10279	10300	10265	-18	2	-44	65	54	0	0	0	15	25	4	40	5	23	-12	93	-91
2017-01-17	180	moderate pollution	136	153	21	2.2	73	21	18	27	10	55	7	32766	10265	10286	10246	-10	21	-20	68	52	0	0	0	12	22	4	42	4	23	-12	101	-86
2017-01-18	62	good	36	54	10	0.9	50	39	24	26	12	62	11	32766	10293	10316	10273	-25	18	-58	44	24	0	0	0	13	34	3	56	3	57	-43	143	-121
2017-01-19	70	good	46	90	14	1.2	37	63	14	16	15	45	21	32766	10265	10320	10226	-31	-6	-59	43	17	0	0	0	37	79	15	155	1	73	-25	108	-95
2017-01-20	43	perfect	23	37	9	0.8	35	57	9	14	4	27	21	32766	10297	10330	10265	-51	-2	-84	26	17	0	0	0	23	66	1	126	1	86	-54	151	-139
2017-01-21	49	perfect	25	49	10	0.8	29	72	11	14	7	32	23	32766	10266	10314	10230	-37	1	-94	25	14	0	0	0	29	70	1	139	16	89	-51	126	-146
2017-01-22	52	good	25	36	12	0.9	42	49	16	15	8	39	15	32766	10312	10333	10290	-50	6	-92	30	19	0	0	0	20	29	4	55	1	84	-62	164	-153
2017-01-23	58	good	33	47	13	1	47	44	18	21	8	47	13	32766	10315	10334	10290	-52	3	-101	38	22	0	0	0	14	27	5	43	5	88	-69	146	-157
2017-01-24	114	mild pollution	87	101	29	2.1	75	29	12	13	10	35	8	32766	10327	10351	10310	-39	23	-101	48	26	0	0	0	15	24	10	36	10	73	-59	156	-150
2017-01-25	224	severe pollution	174	190	39	3.3	94	30	15	17	9	41	8	32766	10281	10317	10245	-30	30	-75	59	39	0	0	0	12	31	4	44	4	63	-51	130	-124
2017-01-26	209	severe pollution	159	194	27	2.7	63	70	13	15	7	35	17	32766	10200	10272	10155	11	95	-50	51	19	0	0	0	27	60	2	119	1	26	-7	166	-104
2017-01-27	87	good	65	104	22	0.8	30	77	11	9	5	25	31	32766	10268	10303	10224	-6	43	-61	33	21	0	0	0	26	68	12	105	12	89	-28	171	-140
2017-01-28	398	gross pollution	348	431	85	2.7	71	26	11	17	7	35	14	32766	10176	10227	10153	-17	20	-43	53	27	0	0	0	18	25	10	41	3	2	-31	118	-96
2017-01-29	56	good	31	62	10	0.7	15	68	11	17	7	35	30	32766	10251	10311	10170	-17	14	-39	33	15	0	0	0	38	81	1	149	1	48	-12	113	-89
2017-01-30	40	perfect	27	40	10	0.6	21	72	17	21	14	52	25	32766	10330	10370	10299	-31	18	-75	17	7	0	0	0	23	54	16	98	16	85	-19	202	-145
2017-01-31	104	mild pollution	79	92	28	1.3	43	57	11	18	13	42	22	32766	10254	10299	10219	-12	48	-55	21	11	0	0	0	16	31	10	47	11	80	-21	192	-109
2017-02-01	51	good	33	53	14	0.6	26	62	10	15	10	35	31	32766	10329	10360	10255	-7	45	-41	20	11	0	0	0	23	53	3	84	3	90	-16	222	-114
2017-02-02	103	mild pollution	78	101	30	1.6	62	50	14	23	8	45	13	32766	10270	10320	10231	-31	56	-100	34	14	0	0	0	12	28	11	47	11	78	-40	204	-147
2017-02-03	210	severe pollution	160	188	45	2.7	86	49	16	24	9	49	11	32766	10197	10233	10163	-8	64	-64	42	21	0	0	0	11	21	10	33	9	69	-28	166	-113
2017-02-04	305	gross pollution	255	297	51	3.4	96	52	12	15	7	34	12	32766	10147	10174	10116	20	77	-15	61	37	0	0	0	15	24	10	38	11	58	1	164	-73
2017-02-05	43	perfect	12	19	7	0.5	25	86	12	17	10	39	43	32766	10182	10206	10144	42	92	-15	26	12	0	0	0	21	51	1	106	2	98	22	249	-98
2017-02-06	36	perfect	13	26	7	0.5	29	68	16	24	20	60	35	32766	10276	10307	10207	12	64	-19	26	16	0	0	0	25	49	4	79	5	64	-2	242	-75
2017-02-07	103	mild pollution	78	96	21	1.6	61	40	16	22	14	52	17	32766	10274	10296	10255	-2	32	-19	51	27	0	0	0	14	35	12	65	11	0	3	157	-69
2017-02-08	49	perfect	30	49	7	0.8	26	76	20	21	10	51	33	32766	10272	10283	10253	-3	38	-35	35	16	0	0	0	34	66	15	123	15	91	7	189	-85
2017-02-09	38	perfect	7	22	3	0.3	12	76	18	16	12	46	40	32766	10250	10288	10221	-13	28	-37	21	13	0	0	0	44	65	16	132	1	99	-7	182	-89
2017-02-10	42	perfect	7	23	3	0.4	15	85	10	13	5	28	39	32766	10254	10277	10235	6	55	-30	17	11	0	0	0	32	61	16	117	15	96	8	207	-81
2017-02-11	65	good	47	72	19	1	48	77	6	10	5	21	28	32766	10245	10263	10219	4	91	-74	28	13	0	0	0	15	35	10	53	11	94	-8	266	-125
2017-02-12	137	mild pollution	105	134	42	2.4	79	43	7	13	4	24	23	32766	10228	10245	10208	11	104	-46	35	18	0	0	0	12	35	3	54	3	88	-1	244	-110
2017-02-13	108	mild pollution	82	107	24	2.1	69	70	4	7	2	13	33	32766	10272	10293	10220	41	122	-31	36	13	0	0	0	15	41	4	66	2	96	23	285	-101
2017-02-14	230	severe pollution	180	196	31	2.9	98	20	12	21	9	42	11	32766	10294	10323	10257	-1	69	-38	70	29	0	0	0	15	41	9	65	9	30	-10	159	-91
2017-02-15	281	severe pollution	231	265	37	3.2	109	49	12	15	9	36	39	32766	10173	10259	10112	17	87	-34	63	36	0	0	0	10	28	10	41	10	39	8	204	-82
2017-02-16	135	mild pollution	104	79	19	1.4	54	66	14	14	8	36	46	32766	10142	10228	10079	54	93	16	33	17	0	0	0	38	86	3	149	3	11	30	140	-44
2017-02-17	41	perfect	22	41	7	0.6	31	80	19	17	8	44	49	32766	10270	10305	10228	20	62	-10	20	10	0	0	0	30	64	1	123	2	97	27	256	-64
2017-02-18	113	mild pollution	86	123	27	1.7	75	52	14	19	9	42	28	32766	10188	10243	10132	33	102	-37	34	19	0	0	0	18	37	9	61	9	87	32	240	-85
2017-02-19	128	mild pollution	98	145	24	1.5	61	83	16	19	18	53	50	32766	10062	10132	10017	55	142	-6	40	12	0	0	0	34	75	2	139	2	55	55	249	-45
2017-02-20	36	perfect	11	32	5	0.5	26	72	18	20	8	46	53	32766	10266	10301	10130	11	64	-23	18	11	0	0	0	37	94	1	186	1	64	17	185	-65
2017-02-21	82	good	61	92	15	1.3	58	31	17	19	13	49	18	32766	10271	10310	10228	-16	22	-27	59	18	0	38	38	21	62	11	105	11	0	-20	73	-70
2017-02-22	103	mild pollution	78	72	7	1.1	41	68	8	9	4	21	12	32766	10196	10230	10171	-2	58	-46	70	28	16	0	16	31	55	16	111	16	44	-9	-1	-19
2017-02-23	41	perfect	18	31	7	0.6	33	78	11	20	8	39	39	32766	10249	10278	10214	26	81	-46	38	22	0	0	0	16	59	1	106	1	104	19	169	-57
2017-02-24	57	good	26	40	10	0.8	46	76	11	16	5	32	34	32766	10213	10230	10187	47	114	-42	43	18	0	0	0	19	39	14	69	16	101	33	213	-64
2017-02-25	43	perfect	11	22	6	0.5	32	86	7	16	6	29	49	32766	10191	10217	10161	79	135	2	28	17	0	0	0	16	50	14	102	13	97	65	275	-50
2017-02-26	66	good	28	47	10	0.8	53	72	7	7	4	18	45	32766	10207	10227	10181	69	133	-7	36	22	0	0	0	19	38	11	64	12	99	59	287	-51
2017-02-27	97	good	66	96	17	1.5	78	54	4	7	5	16	37	32766	10174	10205	10141	73	161	-8	41	17	0	0	0	18	33	11	60	10	93	65	295	-48
2017-02-28	43	perfect	14	29	6	0.6	33	87	7	9	5	21	61	32766	10151	10170	10126	101	157	40	24	11	0	0	0	20	52	1	95	1	97	87	329	-33
2017-03-01	47	perfect	8	38	3	0.4	13	94	7	11	7	25	71	32766	10199	10235	10140	62	115	42	14	9	0	0	0	47	86	2	154	1	86	70	243	-11
2017-03-02	67	good	39	77	13	0.9	54	70	7	15	4	26	55	32766	10151	10236	10093	62	151	-4	23	12	0	0	0	24	53	11	89	11	101	68	312	-67
2017-03-03	111	mild pollution	84	141	23	1.5	69	60	8	14	9	31	50	32766	10099	10121	10086	73	144	0	38	22	0	0	0	31	49	5	76	4	93	76	311	-55
2017-03-04	113	mild pollution	86	111	26	1.7	73	82	10	17	12	39	39	32766	10136	10153	10104	52	124	-18	40	23	0	0	0	8	42	6	73	7	89	67	308	-60
2017-03-05	42	perfect	12	32	4	0.4	18	84	9	15	10	34	61	32766	10192	10220	10126	71	112	42	22	13	0	0	0	44	73	15	153	15	80	92	325	-22
2017-03-06	45	perfect	17	45	6	0.7	35	81	7	15	2	24	37	32766	10166	10203	10133	37	99	-10	28	17	0	0	0	35	66	3	123	3	55	17	297	-71
2017-03-07	40	perfect	7	25	3	0.4	14	80	10	15	4	29	50	32766	10204	10224	10169	35	85	-3	21	15	0	0	0	40	66	1	122	3	106	64	260	-59
2017-03-08	45	perfect	10	30	3	0.5	23	90	11	15	5	31	47	32766	10145	10194	10107	69	134	-22	21	11	0	0	0	23	64	15	123	14	106	79	322	-82
2017-03-09	46	perfect	13	34	4	0.5	37	83	10	11	12	33	54	32766	10106	10128	10075	96	175	-8	19	8	0	0	0	22	44	14	73	14	104	97	383	-74
2017-03-10	77	good	31	62	11	0.9	62	88	11	11	2	24	58	32766	10120	10144	10096	102	193	1	26	8	0	0	0	9	39	11	66	10	100	114	396	-65
2017-03-11	65	good	46	81	15	0.9	50	89	7	11	5	23	56	32766	10137	10150	10118	135	199	66	22	10	0	0	0	17	52	1	96	16	64	135	359	11
2017-03-12	44	perfect	7	28	3	0.3	12	88	12	15	10	37	90	32766	10223	10252	10147	93	161	59	15	8	0	0	0	37	76	1	138	1	108	120	356	-12
2017-03-13	43	perfect	11	29	5	0.5	31	87	14	17	6	37	63	32766	10233	10265	10191	96	155	18	15	8	0	0	0	25	46	2	80	2	110	113	390	-64
2017-03-14	51	good	19	48	7	0.6	41	85	6	11	4	21	58	32766	10218	10239	10194	111	173	5	18	8	0	0	0	20	44	4	80	1	106	129	404	-66
2017-03-15	86	good	64	94	22	1.2	67	77	8	18	13	39	48	32766	10205	10239	10160	82	155	15	39	14	0	0	0	28	43	11	72	12	98	103	354	-36
2017-03-16	148	mild pollution	114	156	25	1.4	89	83	6	16	10	32	46	32766	10152	10170	10130	101	163	20	36	18	0	0	0	20	50	11	73	10	86	97	353	-44
2017-03-17	160	moderate pollution	122	162	19	1.1	70	81	8	7	4	19	39	32766	10152	10166	10136	107	156	70	50	31	0	0	0	18	35	10	58	12	35	119	331	13
2017-03-18	190	moderate pollution	143	173	15	1.2	68	139	5	6	1	12	44	32766	10195	10216	10155	118	191	40	49	17	0	0	0	22	38	10	74	10	85	137	377	-18
2017-03-19	273	severe pollution	223	251	33	2.1	81	150	8	12	4	24	40	32766	10205	10232	10171	120	183	56	56	35	0	0	0	23	42	10	70	8	54	141	348	6
2017-03-20	182	moderate pollution	138	190	20	1.4	75	60	9	15	5	29	29	32766	10186	10213	10160	98	147	76	59	33	0	3	3	24	49	5	78	5	0	88	200	64
2017-03-21	113	mild pollution	86	113	7	0.8	47	98	9	13	7	29	33	32766	10209	10241	10171	92	142	44	55	32	0	0	0	19	44	11	71	11	59	125	352	-6
2017-03-22	175	moderate pollution	133	174	19	1.3	81	74	10	11	3	24	31	32766	10159	10184	10143	98	139	37	47	30	0	0	0	15	27	11	47	9	0	109	309	-12
2017-03-23	160	moderate pollution	122	128	6	1.7	59	52	8	9	2	19	10	32766	10204	10223	10155	73	124	53	77	38	26	7	33	22	61	6	101	6	0	67	95	53
2017-03-24	80	good	59	0	2	1	49	50	8	7	4	19	4	32766	10196	10217	10174	33	77	15	92	52	67	22	89	16	30	6	56	4	0	41	67	15
2017-03-25	48	perfect	34	35	3	0.8	36	82	5	9	3	17	33	32766	10171	10189	10151	77	139	7	62	22	0	0	0	24	52	12	101	2	64	81	271	-5
2017-03-26	44	perfect	12	28	3	0.4	23	89	7	4	2	13	73	32766	10168	10181	10151	101	144	73	33	19	0	0	0	28	52	16	119	1	77	120	329	13
2017-03-27	43	perfect	16	33	3	0.4	33	87	7	7	8	22	60	32766	10180	10206	10157	105	153	53	31	15	0	0	0	22	43	1	84	16	115	132	366	-10
2017-03-28	80	good	59	93	9	0.7	51	100	3	6	2	11	60	32766	10169	10187	10143	108	165	38	47	21	0	0	0	29	51	11	77	11	103	135	370	-4
2017-03-29	148	mild pollution	114	141	11	0.9	64	111	5	13	2	20	50	32766	10154	10170	10125	125	196	52	58	30	0	0	0	21	52	11	80	10	94	153	386	10
2017-03-30	114	mild pollution	87	131	16	1.2	56	85	27	9	3	39	55	32766	10189	10218	10144	128	161	92	46	25	0	0	0	23	60	5	95	4	42	152	347	57
2017-03-31	47	perfect	19	47	4	0.5	33	86	4	8	3	15	65	32766	10215	10248	10166	129	188	66	28	13	0	0	0	25	51	12	91	13	114	172	413	2
2017-04-01	67	good	29	76	6	0.6	54	88	4	10	3	17	32766	43	10128	10175	10082	144	222	43	29	13	0	0	0	25	50	11	78	11	114	183	453	-7
2017-04-02	91	good	67	111	14	1.1	73	97	4	9	2	15	32766	40	10142	10169	10107	151	231	58	31	14	0	0	0	17	48	6	74	6	104	188	482	3
2017-04-03	165	moderate pollution	126	171	21	1.3	78	159	7	8	2	17	32766	34	10134	10163	10103	170	255	77	44	19	0	0	0	23	58	11	105	10	102	176	434	22
2017-04-04	174	moderate pollution	132	155	21	1.2	63	90	9	11	2	22	32766	21	10111	10127	10093	167	202	132	52	32	0	0	0	21	53	11	88	11	0	172	280	88
2017-04-05	81	good	60	74	5	0.6	28	129	9	13	10	32	32766	27	10089	10114	10057	153	200	126	67	45	0	0	0	26	46	10	72	10	56	188	439	111
2017-04-06	125	mild pollution	96	127	6	0.9	46	123	7	10	6	23	32766	28	10070	10085	10048	161	249	92	63	31	0	0	0	10	33	9	57	8	91	212	488	62
2017-04-07	100	good	75	120	8	0.8	46	76	7	6	3	16	32766	30	10103	10127	10069	145	200	126	57	49	0	0	0	19	49	7	92	6	0	169	305	109
2017-04-08	86	good	57	122	8	0.9	49	64	7	7	7	21	32766	30	10137	10161	10086	153	183	134	54	22	0	0	0	27	45	4	81	5	18	189	367	111
2017-04-09	87	good	65	103	7	1	46	98	9	12	4	25	32766	33	10169	10202	10134	130	187	71	54	27	0	0	0	21	46	11	76	13	101	182	430	24
2017-04-10	90	good	67	119	9	0.8	61	72	9	11	3	23	32766	37	10079	10136	10035	148	198	109	43	26	0	0	0	23	50	11	79	11	91	185	389	86
2017-04-11	58	good	26	67	3	0.4	32	90	7	5	3	15	32766	57	10110	10149	10040	155	216	79	27	6	0	0	0	33	63	1	118	1	71	174	441	33
2017-04-12	70	good	28	91	5	0.6	53	97	6	10	3	19	32766	43	10094	10133	10055	165	260	60	28	9	0	0	0	23	61	14	113	11	104	197	516	0
2017-04-13	91	good	53	132	14	1.1	64	77	6	8	4	18	32766	42	10064	10123	10006	143	191	57	29	19	0	0	0	23	58	11	90	11	59	166	416	10
2017-04-14	93	good	61	137	6	0.9	67	99	5	3	3	11	32766	40	10005	10017	9980	185	278	79	43	13	0	0	0	20	66	14	120	14	107	229	521	36
2017-04-15	70	good	36	90	5	0.5	51	119	5	5	1	11	32766	45	10040	10057	10003	216	311	103	31	7	0	0	0	17	48	12	76	13	114	252	573	52
2017-04-16	124	mild pollution	95	177	17	1	72	110	13	15	6	34	32766	34	10048	10071	10027	200	252	139	43	19	0	0	0	22	47	6	73	7	68	210	401	86
2017-04-17	168	moderate pollution	128	221	8	1	57	97	9	12	6	27	32766	30	9969	10043	9911	193	256	108	50	16	0	0	0	27	67	11	97	11	66	228	436	65
2017-04-18	65	good	24	81	2	0.3	20	94	9	9	4	22	32766	82	9996	10020	9927	187	233	148	13	8	0	0	0	40	64	16	129	15	120	227	460	73
2017-04-19	87	good	43	117	7	0.9	70	35	5	9	4	18	32766	36	10044	10065	10016	143	194	127	41	12	0	0	0	17	39	4	65	6	0	141	242	65
2017-04-20	71	good	39	92	3	0.7	45	90	8	10	5	23	32766	38	10059	10079	10036	158	233	56	42	11	0	0	0	16	43	2	99	2	82	218	514	0
2017-04-21	54	good	18	59	2	0.3	22	104	7	13	5	25	32766	58	10110	10137	10059	174	225	129	29	17	0	0	0	29	50	3	88	1	119	233	534	82
2017-04-22	87	good	44	124	8	0.5	45	122	8	7	3	18	32766	64	10051	10105	10002	187	264	95	33	11	0	0	0	38	83	12	139	11	122	234	504	35
2017-04-23	62	good	23	71	4	0.4	23	115	5	9	3	17	32766	76	10049	10080	10011	189	241	155	25	14	0	0	0	31	67	11	115	11	121	249	538	93
2017-04-24	66	good	34	83	5	0.5	32	111	7	8	3	18	32766	78	10080	10108	10046	179	233	104	30	5	0	0	0	36	78	1	176	1	116	238	471	55
2017-04-25	38	perfect	13	38	2	0.3	24	77	9	8	6	23	32766	71	10172	10197	10108	160	204	137	17	6	0	0	0	31	61	2	143	2	63	197	445	83
2017-04-26	51	good	14	39	3	0.4	29	102	10	14	11	35	32766	64	10179	10207	10141	180	235	78	18	9	0	0	0	30	58	15	113	15	121	232	507	14
2017-04-27	54	good	15	47	2	0.4	34	105	7	14	7	28	32766	64	10103	10172	10037	204	288	72	16	6	0	0	0	27	66	14	118	13	124	249	564	16
2017-04-28	62	good	23	67	3	0.4	38	115	4	12	3	19	32766	61	10020	10051	9977	221	306	122	20	8	0	0	0	16	52	12	80	11	115	269	598	54
2017-04-29	76	good	40	103	3	0.5	41	127	7	11	4	22	32766	72	9990	10019	9943	257	335	136	24	11	0	0	0	22	62	11	103	11	119	303	604	82
2017-04-30	105	mild pollution	50	161	5	0.5	43	141	6	6	3	15	32766	77	10041	10080	9953	231	289	160	23	12	0	0	0	25	63	12	121	13	111	278	547	98
2017-05-01	81	good	40	112	8	0.7	46	123	2	4	2	8	32766	58	10120	10144	10080	204	267	118	28	15	0	0	0	16	37	6	78	6	99	249	538	61
2017-05-02	132	mild pollution	59	134	10	1	53	196	17	20	14	51	32766	48	10112	10138	10091	222	293	135	36	19	0	0	0	16	43	11	71	11	98	279	553	91
2017-05-03	93	good	70	118	9	0.9	47	118	12	13	7	32	32766	43	10113	10126	10094	206	263	177	55	27	0	0	0	20	67	10	103	10	0	228	494	140
2017-05-04	500	gross pollution	353	799	2	0.3	22	96	10	14	6	30	32766	65	10109	10134	10085	199	248	159	30	8	2	0	2	24	57	1	111	16	54	247	492	118
2017-05-05	342	gross pollution	178	454	4	0.4	22	88	5	11	3	19	32766	82	10104	10139	10048	180	213	154	23	7	0	0	0	40	97	15	199	15	90	220	464	111
2017-05-06	71	good	32	93	3	0.4	35	113	5	9	4	18	32766	69	10090	10125	10061	215	289	115	21	12	0	0	0	25	74	15	137	15	115	269	552	57
2017-05-07	85	good	27	73	4	0.4	41	142	6	9	5	20	32766	57	10089	10122	10048	230	309	130	28	12	0	0	0	21	58	11	93	13	118	302	627	61
2017-05-08	101	mild pollution	55	113	8	0.6	55	162	8	13	13	34	32766	44	10033	10060	10007	237	308	147	35	13	0	0	0	18	38	11	68	11	56	298	605	101
2017-05-09	100	good	44	96	7	0.5	25	160	6	11	4	21	32766	61	10032	10060	10007	221	283	166	46	26	0	0	0	35	69	11	107	12	118	293	542	116
2017-05-10	81	good	39	71	4	0.5	31	138	8	11	8	27	32766	60	10020	10049	9996	231	316	150	45	12	0	0	0	27	64	15	129	15	120	308	619	113
2017-05-11	91	good	29	133	3	0.4	32	96	7	13	7	27	32766	98	10025	10056	10006	233	301	130	28	6	0	0	0	33	83	1	156	16	125	283	556	72
2017-05-12	111	mild pollution	46	172	5	0.5	26	144	6	10	2	18	32766	90	10007	10078	9931	226	291	134	18	6	0	0	0	36	76	11	135	15	103	281	528	71
2017-05-13	61	good	19	73	2	0.3	16	91	4	10	2	16	32766	90	10035	10067	9955	217	281	143	21	12	0	0	0	41	75	1	149	16	128	285	557	76
2017-05-14	70	good	13	40	2	0.3	16	124	8	10	9	27	32766	60	10098	10129	10050	235	279	174	27	19	0	0	0	29	40	4	77	4	123	322	612	116
2017-05-15	81	good	22	61	7	0.6	24	138	5	6	4	15	32766	64	10103	10135	10069	217	279	157	30	18	0	0	0	18	43	4	65	4	123	288	612	83
2017-05-16	124	mild pollution	43	91	10	0.6	30	187	9	11	5	25	32766	62	10031	10082	9981	239	311	163	36	19	0	0	0	24	58	11	89	12	124	308	612	117
2017-05-17	185	moderate pollution	62	114	9	0.7	36	250	6	11	3	20	32766	53	10006	10021	9985	260	321	176	48	29	0	0	0	21	34	10	61	9	121	344	629	133
2017-05-18	201	severe pollution	81	145	11	0.9	51	275	6	7	4	17	32766	59	10027	10045	10006	277	347	197	51	28	0	0	0	19	49	10	85	9	113	351	629	153
2017-05-19	187	moderate pollution	84	154	10	0.8	40	252	2	5	3	10	32766	68	10026	10041	10007	293	368	226	50	20	0	0	0	21	60	11	105	10	100	361	623	184
2017-05-20	171	moderate pollution	57	126	9	0.8	38	236	7	10	6	23	32766	64	10051	10072	10026	281	351	207	46	23	0	7	7	21	53	10	90	10	109	348	641	157
2017-05-21	116	mild pollution	57	97	15	1	27	178	6	11	6	23	32766	77	10062	10081	10037	237	292	198	56	35	0	0	0	30	56	6	85	6	96	296	582	173
2017-05-22	53	good	37	57	7	1.1	37	54	5	12	7	24	32766	34	10085	10106	10059	181	228	161	80	54	0	292	292	20	54	5	84	6	0	185	221	164
2017-05-23	71	good	18	36	3	0.5	33	126	4	8	3	15	32766	44	10103	10125	10065	218	294	132	55	21	0	0	0	15	49	11	76	12	125	254	437	98
2017-05-24	84	good	17	53	3	0.4	45	141	5	7	3	15	32766	75	10047	10078	10004	254	337	136	36	14	0	0	0	23	79	12	120	11	134	287	534	104
2017-05-25	104	mild pollution	21	84	6	0.6	39	165	6	8	4	18	32766	81	10071	10091	10011	245	291	170	38	20	0	0	0	34	56	10	97	10	125	297	532	131
2017-05-26	154	moderate pollution	44	96	9	0.6	50	219	5	5	2	12	32766	63	10061	10098	10018	225	290	147	39	28	0	0	0	14	47	10	79	9	119	302	558	124
2017-05-27	196	moderate pollution	67	118	21	1.4	47	261	5	6	2	13	32766	61	10013	10033	9980	242	307	180	48	32	0	0	0	25	42	5	78	5	117	320	567	147
2017-05-28	194	moderate pollution	89	140	17	1.5	36	259	8	10	6	24	32766	67	10012	10031	9988	273	354	203	50	24	0	0	0	23	71	5	114	5	87	339	595	174
2017-05-29	69	good	28	89	8	0.7	26	101	11	11	6	28	32766	86	10074	10098	10031	241	289	218	41	30	0	0	0	31	60	5	96	5	0	271	451	213
2017-05-30	101	mild pollution	41	70	3	0.7	39	162	4	8	4	16	32766	38	10030	10077	10000	219	273	181	64	45	10	1	11	20	38	11	60	11	44	270	504	173
2017-05-31	140	mild pollution	67	108	4	0.8	46	205	4	8	4	16	32766	53	9954	10011	9893	253	335	165	55	29	0	0	0	21	61	12	106	12	101	316	571	129
2017-06-01	123	mild pollution	23	56	4	0.6	30	186	13	14	20	47	32766	79	10002	10022	9919	254	311	162	36	18	0	0	0	27	77	6	138	7	124	334	612	126
2017-06-02	57	good	23	65	12	1	39	74	6	11	4	21	32766	84	10031	10066	9985	197	261	179	50	26	0	0	0	32	62	5	123	7	55	251	449	168
2017-06-03	83	good	29	57	5	0.7	37	140	8	7	3	18	32766	49	10081	10103	10049	208	277	126	46	22	0	0	0	16	43	11	75	5	107	274	536	86
2017-06-04	141	mild pollution	48	93	11	0.7	50	206	8	6	4	18	32766	57	10062	10077	10042	249	320	154	37	20	0	0	0	19	42	11	72	12	118	327	606	113
2017-06-05	149	mild pollution	66	116	16	1	63	214	7	9	4	20	32766	47	10076	10091	10058	253	293	200	38	26	0	0	0	16	30	9	50	8	16	273	537	160
2017-06-06	51	good	36	45	2	0.6	25	96	7	10	4	21	32766	33	10066	10095	10044	181	266	168	76	26	29	4	33	20	59	13	108	13	5	194	264	159
2017-06-07	91	good	47	64	4	0.7	31	150	1	4	0	5	32766	41	10040	10058	10015	228	304	147	57	27	0	0	0	11	46	11	83	12	118	304	568	115
2017-06-08	70	good	24	55	3	0.6	54	124	5	8	2	15	32766	51	10019	10046	9985	254	331	167	41	18	0	2	2	12	100	12	188	10	70	278	582	121
2017-06-09	148	mild pollution	30	92	5	0.7	52	213	5	3	2	10	32766	73	9980	10007	9949	292	383	184	34	12	0	0	0	21	71	11	115	11	127	363	636	135
2017-06-10	82	good	21	70	11	0.8	33	139	5	3	2	10	32766	110	10048	10063	9958	250	326	191	22	15	0	0	0	34	74	6	122	6	122	326	585	152
2017-06-11	124	mild pollution	33	86	7	0.7	49	187	5	11	4	20	32766	61	10057	10072	10036	236	306	156	37	16	0	6	6	16	41	13	73	7	94	318	608	116
2017-06-12	88	good	34	80	17	1.2	46	146	4	4	4	12	32766	78	10088	10097	10053	233	271	197	37	24	0	0	0	30	58	5	101	5	27	273	479	143
2017-06-13	93	good	40	63	5	0.9	43	152	4	8	6	18	32766	39	10111	10131	10092	221	261	162	56	41	0	106	106	15	39	6	62	7	52	243	351	161
2017-06-14	123	mild pollution	37	61	3	0.8	48	186	4	6	1	11	32766	52	10072	10105	10035	266	361	161	49	17	0	0	0	19	40	11	63	13	131	314	566	129
2017-06-15	155	moderate pollution	39	93	4	0.7	49	220	3	8	3	14	32766	70	10023	10044	9995	296	385	190	34	14	0	0	0	23	48	11	81	12	118	344	608	160
2017-06-16	158	moderate pollution	59	128	7	0.7	41	223	6	11	11	28	32766	92	10007	10024	9988	310	376	235	33	16	0	0	0	35	62	11	104	13	122	356	598	184
2017-06-17	200	moderate pollution	80	157	11	0.9	37	267	7	12	8	27	32766	80	9994	10009	9972	302	352	238	36	24	0	0	0	32	58	11	89	11	56	348	538	196
2017-06-18	197	moderate pollution	71	128	12	0.9	32	262	4	9	8	21	32766	76	9985	10002	9961	292	347	256	42	28	0	4	4	32	65	11	108	11	78	346	573	220
2017-06-19	154	moderate pollution	36	62	3	0.6	27	219	8	5	3	16	32766	63	9977	10000	9945	289	352	226	45	22	0	0	0	16	37	10	69	11	130	378	632	189
2017-06-20	156	moderate pollution	30	61	4	0.7	26	221	5	7	3	15	32766	83	9986	10011	9955	280	336	210	43	30	0	0	0	21	75	5	124	5	127	369	626	187
2017-06-21	161	moderate pollution	49	83	8	0.9	29	226	2	8	3	13	32766	57	10004	10017	9970	271	313	233	52	39	0	0	0	38	49	10	116	13	48	343	555	216
2017-06-22	50	perfect	32	39	2	0.8	25	101	3	7	3	13	32766	27	10035	10044	10012	208	264	195	86	56	12	151	163	20	74	12	126	11	0	218	276	198
2017-06-23	51	good	18	21	2	0.7	20	102	3	7	2	12	32766	8	10014	10036	9999	195	221	184	91	77	618	5	623	26	50	3	81	3	0	199	303	184
2017-06-24	65	good	21	33	3	0.6	22	119	4	5	2	11	32766	24	10006	10015	9992	225	265	182	72	51	258	0	258	25	45	4	84	4	45	239	327	179
2017-06-25	108	mild pollution	26	45	2	0.5	33	169	6	8	3	17	32766	39	10003	10011	9986	251	318	179	62	33	0	0	0	14	26	7	49	10	109	266	398	163
2017-06-26	134	mild pollution	23	47	2	0.5	37	198	7	11	13	31	32766	49	10020	10035	10002	279	341	198	54	31	0	0	0	15	34	10	52	9	131	280	409	179
2017-06-27	200	moderate pollution	72	111	7	0.9	41	270	3	6	3	12	32766	55	10019	10033	9990	289	351	229	58	32	0	0	0	19	41	10	68	10	105	288	404	196
2017-06-28	189	moderate pollution	95	127	8	1.3	43	254	5	9	6	20	32766	40	10019	10034	9998	283	344	234	62	42	0	0	0	16	38	14	72	13	90	287	417	208
2017-06-29	139	mild pollution	57	89	6	0.9	32	203	6	10	7	23	32766	44	10021	10035	9993	293	328	243	61	45	0	0	0	15	42	14	78	14	72	325	478	226
2017-06-30	200	moderate pollution	71	113	3	0.9	39	267	5	11	3	19	32766	49	9994	10020	9965	299	353	242	57	39	0	0	0	18	43	11	67	10	112	342	527	221
2017-07-01	198	moderate pollution	88	133	4	1	42	263	4	6	2	12	32766	47	9974	9990	9955	306	357	260	58	38	0	0	0	20	40	10	74	10	71	343	517	243
2017-07-02	189	moderate pollution	90	121	7	1.1	33	254	3	9	4	16	32766	60	9979	9992	9962	297	346	258	60	42	0	0	0	26	38	9	71	7	71	343	527	240
2017-07-03	122	mild pollution	61	79	3	0.9	30	185	3	5	2	10	32766	40	10002	10013	9981	283	321	247	69	54	0	0	0	20	35	7	59	5	28	346	511	239
2017-07-04	96	good	47	64	3	0.9	39	156	4	8	6	18	32766	46	10026	10046	9996	260	299	222	78	56	215	169	384	21	41	12	59	11	9	270	362	222
2017-07-05	134	mild pollution	82	95	3	1.1	38	198	3	8	7	18	32766	28	10034	10048	10013	285	323	245	73	57	0	0	0	20	38	10	63	7	85	295	387	231
2017-07-06	96	good	72	105	4	1.5	33	93	4	9	6	19	32766	17	10004	10035	9977	245	295	232	89	64	12	329	341	19	63	10	105	9	0	243	280	234
2017-07-07	113	mild pollution	32	50	2	0.8	20	175	5	5	3	13	32766	47	9934	9979	9908	276	334	211	71	50	43	0	43	32	54	12	88	10	125	290	400	203
2017-07-08	161	moderate pollution	39	60	2	0.7	30	226	4	7	5	16	32766	45	9938	9974	9907	268	321	206	72	36	33	0	33	20	66	15	146	16	95	289	408	197
2017-07-09	169	moderate pollution	75	100	3	1.1	29	234	1	6	3	10	32766	43	9937	9954	9915	311	358	270	64	46	0	0	0	18	36	3	55	5	93	313	429	248
2017-07-10	136	mild pollution	24	54	2	0.6	33	200	2	3	2	7	32766	71	9938	9958	9921	304	365	224	50	24	0	0	0	19	86	13	141	13	135	300	428	201
2017-07-11	208	severe pollution	46	93	4	0.9	44	311	6	7	7	20	32766	45	9968	9979	9938	302	352	240	57	40	0	0	0	17	38	10	63	9	114	292	414	210
2017-07-12	191	moderate pollution	73	133	4	1	40	256	4	7	6	17	32766	44	9976	9989	9962	310	357	248	63	50	0	0	0	19	43	10	62	8	105	319	469	220
2017-07-13	131	mild pollution	64	92	4	0.8	24	195	5	4	8	17	32766	41	9956	9970	9932	324	357	282	68	58	0	0	0	21	41	10	72	11	96	344	485	258
2017-07-14	127	mild pollution	34	68	3	0.7	35	190	5	3	4	12	32766	49	9970	9992	9931	300	343	261	61	47	0	0	0	26	63	2	136	2	48	295	436	239
2017-07-15	97	good	35	50	2	1	26	157	3	5	2	10	32766	36	10025	10043	9986	277	322	250	74	54	6	4	10	16	58	4	96	2	35	283	422	237
2017-07-16	175	moderate pollution	68	89	3	1.2	35	240	4	2	2	8	32766	36	10043	10053	10026	301	342	260	70	50	0	0	0	15	27	4	50	6	97	345	531	240
2017-07-17	120	mild pollution	53	70	3	1.1	28	182	4	4	1	9	32766	41	10047	10058	10031	291	331	262	71	54	0	0	0	15	33	11	53	5	52	326	528	247
2017-07-18	88	good	61	85	3	0.9	27	146	5	5	2	12	32766	31	10019	10046	9991	282	324	265	81	59	3	1	4	17	50	12	87	11	43	293	497	265
2017-07-19	110	mild pollution	74	86	2	0.8	25	171	4	13	10	27	32766	40	9981	10007	9960	292	327	260	76	59	0	0	0	17	76	11	121	12	68	359	549	253
2017-07-20	127	mild pollution	97	118	2	0.8	31	174	6	8	4	18	32766	27	9965	9981	9943	311	347	268	74	62	0	0	0	9	31	11	47	11	0	366	532	253
2017-07-21	53	good	22	29	2	0.7	26	104	4	5	3	12	32766	34	10033	10069	9958	235	330	212	89	69	113	29	142	29	60	5	99	9	0	248	326	217
2017-07-22	38	perfect	23	37	2	0.7	31	77	3	7	2	12	32766	23	10059	10079	10041	250	282	216	71	56	0	0	0	14	21	4	32	15	0	253	330	215
2017-07-23	60	good	43	61	2	0.8	38	106	5	10	3	18	32766	15	10019	10055	9997	263	285	247	74	66	0	0	0	11	18	13	30	14	3	261	344	234
2017-07-24	57	good	41	57	2	0.8	40	43	4	9	3	16	32766	20	10008	10026	9991	274	303	253	77	62	0	0	0	16	37	3	65	3	3	273	365	238
2017-07-25	80	good	33	53	4	0.9	33	137	8	12	5	25	32766	34	10044	10062	10025	273	303	253	69	50	0	0	0	11	53	11	74	11	49	299	468	234
2017-07-26	43	perfect	22	39	2	0.7	31	86	6	9	4	19	32766	31	10026	10045	10009	233	278	215	73	57	4	13	17	22	35	3	61	3	0	234	274	218
2017-07-27	64	good	40	66	3	1	47	117	5	7	3	15	32766	22	10032	10045	10011	254	298	212	70	52	0	0	0	10	33	12	46	11	27	278	510	198
2017-07-28	70	good	28	58	2	0.8	44	125	2	7	4	13	32766	25	10082	10095	10045	273	309	236	66	45	0	0	0	14	27	4	42	10	13	294	428	221
2017-07-29	91	good	32	61	2	0.7	39	150	4	8	2	14	32766	45	10053	10084	10024	252	288	223	71	54	0	0	0	24	65	11	98	11	97	312	509	213
2017-07-30	129	mild pollution	38	67	3	0.7	35	192	4	7	2	13	32766	47	10014	10032	9994	257	305	195	67	46	0	0	0	14	42	9	70	9	128	334	544	180
2017-07-31	200	moderate pollution	79	105	2	1	37	265	3	4	3	10	32766	39	10024	10031	10006	275	322	221	68	48	0	0	0	17	38	11	60	11	100	350	568	208
2017-08-01	90	good	67	85	2	1	30	144	3	7	2	12	32766	36	10034	10045	10010	286	328	255	73	55	0	0	0	19	34	7	56	8	57	349	524	248
2017-08-02	51	good	34	52	4	1.1	26	90	7	5	3	15	32766	41	9989	10028	9953	284	310	256	78	66	0	7	7	21	35	4	58	8	23	320	556	253
2017-08-03	90	good	21	48	2	0.7	19	149	7	6	5	18	32766	35	9919	9965	9904	299	354	244	72	49	661	0	661	23	42	10	71	10	129	313	424	238
2017-08-04	112	mild pollution	22	44	3	0.6	37	174	4	6	3	13	32766	46	9963	9977	9924	311	382	261	64	28	0	0	0	9	45	14	81	13	109	318	430	239
2017-08-05	136	mild pollution	28	60	3	0.7	35	200	6	7	3	16	32766	46	9978	10002	9959	292	331	236	65	39	0	46	46	18	77	13	147	13	85	301	413	227
2017-08-06	78	good	17	34	2	0.5	30	134	5	5	3	13	32766	57	9963	9989	9939	295	365	235	61	26	0	0	0	20	54	14	88	14	126	301	446	216
2017-08-07	88	good	10	33	2	0.5	30	146	6	6	4	16	32766	66	9967	9984	9947	303	352	245	48	29	0	0	0	18	40	10	78	2	133	323	507	206
2017-08-08	162	moderate pollution	30	70	3	0.7	40	227	8	9	2	19	32766	53	9943	9962	9919	300	350	261	59	40	0	0	0	15	38	10	60	11	87	334	518	237
2017-08-09	101	mild pollution	22	36	2	0.6	26	162	5	8	4	17	32766	53	9940	9955	9920	256	315	219	75	52	9	0	9	22	54	4	106	1	69	307	500	213
2017-08-10	125	mild pollution	64	86	2	0.8	33	188	4	7	4	15	32766	35	9953	9964	9937	279	315	240	74	58	0	0	0	21	38	11	64	11	40	308	454	228
2017-08-11	119	mild pollution	91	117	2	1.2	39	139	8	8	3	19	32766	22	9982	10016	9957	270	308	250	75	54	0	29	29	13	53	10	111	11	17	270	345	234
2017-08-12	46	perfect	31	39	2	0.8	37	79	5	8	3	16	32766	14	10036	10062	9984	232	258	215	88	74	44	484	528	23	47	1	89	3	2	241	317	196
2017-08-13	57	good	41	52	2	0.9	36	99	4	5	5	14	32766	6	10042	10053	10034	249	301	222	85	61	43	58	101	11	60	8	114	8	21	259	384	225
2017-08-14	93	good	28	41	2	0.8	26	152	3	5	2	10	32766	28	10038	10052	10019	261	313	223	75	51	7	0	7	18	35	7	53	8	84	284	398	220
2017-08-15	106	mild pollution	54	76	4	1	32	167	5	10	7	22	32766	31	10024	10037	10002	268	306	229	78	63	0	0	0	17	42	11	68	10	62	289	387	216
2017-08-16	85	good	56	73	2	0.9	37	142	6	11	5	22	32766	36	10017	10034	9992	263	319	222	77	53	0	46	46	21	59	4	84	4	49	284	392	220
2017-08-17	92	good	22	37	2	0.7	28	151	4	10	2	16	32766	40	10043	10053	10027	259	310	205	70	49	0	0	0	11	32	4	58	10	109	276	412	195
2017-08-18	72	good	53	74	3	1.2	54	123	4	5	7	16	32766	22	10060	10071	10039	239	293	225	87	60	0	170	170	15	58	11	104	11	5	237	367	217
2017-08-19	70	good	41	55	2	1	32	124	3	5	5	13	32766	12	10064	10080	10045	242	295	223	85	60	56	31	87	10	40	8	77	7	15	271	384	223
2017-08-20	99	good	60	73	3	1.2	37	159	5	7	3	15	32766	23	10040	10066	10011	261	302	220	78	58	0	0	0	11	24	14	40	11	55	283	387	210
2017-08-21	133	mild pollution	71	95	2	1.1	39	197	5	11	5	21	32766	34	10015	10026	9998	283	328	245	75	57	0	0	0	18	35	10	57	10	94	298	398	234
2017-08-22	98	good	74	105	2	1	35	97	6	9	5	20	32766	16	10036	10051	10011	274	302	249	81	68	0	18	18	20	32	2	61	2	0	273	348	249
2017-08-23	57	good	20	28	2	0.7	27	109	6	10	3	19	32766	26	10020	10042	10006	276	335	237	74	37	355	1	356	23	46	15	96	16	69	278	368	239
2017-08-24	47	perfect	14	37	2	0.6	38	82	6	11	6	23	32766	73	10052	10068	10028	282	325	236	53	16	0	0	0	17	52	16	99	15	109	266	358	188
2017-08-25	47	perfect	9	36	3	0.5	38	80	5	6	3	14	32766	71	10076	10092	10062	266	326	177	35	16	0	0	0	23	60	14	111	15	113	236	337	148
2017-08-26	60	good	15	56	3	0.6	48	52	4	9	3	16	32766	34	10107	10122	10078	241	295	194	53	18	0	0	0	16	24	15	39	15	19	218	310	155
2017-08-27	38	perfect	17	30	2	0.6	28	76	5	9	6	20	32766	24	10101	10115	10086	185	250	169	83	42	16	207	223	27	66	12	105	12	0	181	208	171
2017-08-28	34	perfect	19	28	2	0.6	27	68	4	9	4	17	32766	38	10110	10138	10084	216	279	171	68	30	51	0	51	18	48	2	89	3	92	232	331	167
2017-08-29	49	perfect	16	49	4	0.5	36	87	5	8	3	16	32766	50	10147	10176	10113	215	265	157	52	29	0	0	0	25	58	11	92	12	107	209	318	142
2017-08-30	91	good	52	88	4	0.9	44	150	4	7	4	15	32766	33	10097	10118	10077	218	274	156	68	54	0	0	0	15	41	11	68	11	108	232	362	137
2017-08-31	107	mild pollution	81	99	2	0.9	35	120	3	7	3	13	32766	35	10096	10113	10075	222	264	193	77	56	0	0	0	19	39	11	62	11	71	243	358	178
2017-09-01	182	moderate pollution	138	153	3	1.5	40	143	4	5	5	14	32766	32	10080	10100	10062	219	260	182	81	64	1	0	1	16	41	12	66	11	57	236	349	171
2017-09-02	138	mild pollution	106	128	3	1.2	34	139	5	6	4	15	32766	31	10082	10095	10068	239	281	206	74	52	0	0	0	19	52	11	76	11	76	248	355	189
2017-09-03	100	good	57	80	4	0.9	32	160	5	9	5	19	32766	39	10084	10100	10061	230	279	183	70	48	0	0	0	22	52	11	88	11	62	231	340	160
2017-09-04	116	mild pollution	88	113	4	1	35	158	6	7	6	19	32766	32	10071	10088	10057	237	281	201	71	42	0	0	0	21	39	10	63	10	66	243	364	178
2017-09-05	56	good	40	63	2	0.7	36	85	8	10	5	23	32766	55	10057	10077	10038	257	307	215	53	17	0	0	0	22	45	1	85	2	86	269	423	198
2017-09-06	68	good	15	47	3	0.5	40	122	10	13	7	30	32766	44	10037	10058	10011	255	320	197	45	19	0	0	0	12	29	12	56	12	112	277	470	167
2017-09-07	146	mild pollution	45	102	3	0.8	48	211	7	8	3	18	32766	36	10021	10035	10003	253	315	188	59	39	0	0	0	18	31	11	52	11	111	280	479	159
2017-09-08	189	moderate pollution	115	152	4	1.3	44	254	6	13	4	23	32766	26	10035	10047	10018	267	325	213	73	47	0	0	0	16	30	9	49	7	77	297	475	187
2017-09-09	132	mild pollution	101	122	7	1.8	32	181	8	10	7	25	32766	36	10063	10081	10038	258	303	224	72	54	0	0	0	24	40	5	70	6	40	300	473	227
2017-09-10	122	mild pollution	93	120	4	1.2	42	82	6	9	3	18	32766	23	10062	10072	10053	234	274	225	82	63	0	26	26	10	24	9	44	7	26	242	331	207
2017-09-11	50	perfect	19	37	2	0.5	40	89	8	10	4	22	32766	59	10082	10095	10064	234	289	178	50	20	0	0	0	15	47	1	95	16	119	252	443	144
2017-09-12	68	good	21	58	2	0.6	43	122	7	10	10	27	32766	36	10121	10136	10090	236	302	164	57	24	0	0	0	14	29	11	61	9	104	266	482	128
2017-09-13	123	mild pollution	72	125	6	1.2	60	186	7	8	5	20	32766	34	10141	10160	10124	251	305	204	67	49	0	0	0	13	36	10	53	9	73	284	469	182
2017-09-14	112	mild pollution	85	125	5	1.1	51	160	8	9	5	22	32766	41	10137	10150	10122	249	294	201	62	35	0	0	0	19	41	11	66	11	47	286	474	177
2017-09-15	80	good	59	100	4	0.9	63	121	8	13	6	27	32766	29	10134	10153	10116	242	289	216	61	36	0	0	0	10	36	11	61	9	46	278	462	190
2017-09-16	122	mild pollution	93	129	4	1.1	64	153	8	12	7	27	32766	23	10095	10124	10067	230	285	192	70	47	0	0	0	11	23	10	36	10	14	256	428	170
2017-09-17	43	perfect	10	33	3	0.4	35	87	6	9	6	21	32766	60	10080	10106	10045	241	294	200	30	16	0	0	0	22	43	1	91	15	112	261	495	133
2017-09-18	80	good	23	73	3	0.6	56	136	8	9	10	27	32766	38	10023	10055	9989	235	310	147	46	28	0	0	0	16	36	11	55	10	114	260	497	114
2017-09-19	57	good	13	48	3	0.5	46	83	8	7	5	20	32766	59	10057	10084	10000	252	308	165	28	12	0	0	0	13	44	1	89	2	117	255	490	114
2017-09-20	58	good	13	54	3	0.5	47	91	6	8	4	18	32766	52	10101	10126	10075	220	290	144	37	18	0	0	0	17	40	11	59	12	110	244	489	92
2017-09-21	97	good	58	121	8	1	78	139	7	7	4	18	32766	31	10047	10087	10008	224	281	153	56	37	0	0	0	17	40	10	75	12	75	247	486	121
2017-09-22	70	good	23	90	2	0.5	40	83	7	9	8	24	32766	61	10054	10075	9994	228	281	168	33	12	0	0	0	24	57	16	120	15	102	268	495	128
2017-09-23	120	mild pollution	49	190	7	0.9	73	108	6	6	5	17	32766	27	10076	10103	10047	212	285	134	52	32	0	0	0	13	29	10	50	11	61	253	462	103
2017-09-24	102	mild pollution	62	154	4	1.1	61	143	8	8	5	21	32766	26	10063	10077	10046	235	292	182	63	36	0	0	0	13	38	2	65	2	34	270	468	150
2017-09-25	100	good	75	130	8	1.5	47	136	6	7	7	20	32766	25	10077	10092	10053	243	281	217	62	56	0	0	0	19	40	5	73	5	21	278	491	199
2017-09-26	66	good	48	70	2	0.7	43	56	5	8	6	19	32766	40	10097	10126	10063	203	248	178	69	44	0	0	0	18	54	2	88	2	0	197	347	138
2017-09-27	61	good	28	61	4	1	49	30	6	9	6	21	32766	22	10126	10149	10091	166	211	132	68	46	0	1	1	16	38	10	60	10	18	163	374	95
2017-09-28	36	perfect	9	34	4	0.4	29	66	6	8	5	19	32766	57	10126	10151	10094	174	224	81	21	11	0	0	0	24	48	14	87	13	110	209	469	25
2017-09-29	90	good	43	100	4	0.8	72	68	3	5	3	11	32766	32	10086	10100	10067	175	268	91	46	23	0	0	0	16	33	11	60	11	102	224	489	51
2017-09-30	142	mild pollution	109	157	5	1.2	68	112	6	9	10	25	32766	16	10099	10125	10076	192	249	139	68	57	0	0	0	16	40	11	63	11	50	226	423	102
2017-10-01	95	good	71	93	2	0.8	49	83	4	6	4	14	32766	52	10092	10110	10062	212	263	164	52	17	0	0	0	20	50	2	91	2	71	231	413	131
2017-10-02	44	perfect	13	44	4	0.6	34	36	10	13	4	27	32766	38	10185	10218	10110	164	204	134	52	27	0	1	1	21	42	3	68	3	0	161	210	120
2017-10-03	42	perfect	16	36	2	0.5	34	53	11	9	3	23	32766	28	10241	10268	10218	154	205	117	53	18	0	0	0	15	33	10	51	10	63	187	425	86
2017-10-04	55	good	29	60	5	0.6	40	70	1	8	4	13	32766	36	10224	10254	10191	149	220	83	54	28	0	0	0	20	50	10	85	9	100	186	439	46
2017-10-05	75	good	55	79	5	0.8	40	88	5	4	3	12	32766	28	10171	10203	10142	153	207	84	60	41	0	0	0	18	43	12	77	9	97	201	426	43
2017-10-06	90	good	67	89	6	0.8	49	91	6	4	4	14	32766	22	10144	10159	10122	168	228	108	65	45	0	0	0	19	38	10	62	10	86	204	428	71
2017-10-07	145	mild pollution	112	134	3	1.2	75	14	6	7	5	18	32766	12	10153	10171	10133	151	183	122	81	61	0	0	0	12	29	9	45	7	0	153	253	90
2017-10-08	164	moderate pollution	125	148	3	1.3	69	7	5	10	5	20	32766	6	10176	10185	10163	159	176	151	90	78	0	129	129	8	22	12	34	16	0	159	210	140
2017-10-09	41	perfect	29	18	3	0.7	30	35	6	12	8	26	32766	4	10201	10228	10173	134	153	115	92	78	29	370	399	23	54	2	98	2	0	133	152	110
2017-10-10	25	perfect	5	10	4	0.4	20	41	3	3	6	12	32766	8	10235	10256	10225	103	115	94	83	67	144	12	156	20	34	2	61	1	0	113	150	94
2017-10-11	35	perfect	11	22	3	0.5	28	43	6	6	4	16	32766	21	10232	10253	10226	115	166	62	67	33	0	0	0	10	34	1	64	1	50	107	254	46
2017-10-12	50	perfect	21	37	3	0.5	40	40	7	6	3	16	32766	23	10204	10253	10167	111	154	80	63	38	0	0	0	19	46	12	70	11	33	113	240	60
2017-10-13	61	good	38	55	2	0.8	49	53	5	7	1	13	32766	16	10186	10201	10170	118	198	58	74	36	0	0	0	13	27	9	43	11	90	126	268	36
2017-10-14	55	good	15	33	3	0.7	44	20	6	4	4	14	32766	19	10235	10260	10194	107	139	77	58	33	0	6	6	15	26	4	40	4	0	89	147	49
2017-10-15	67	good	49	69	3	1.1	41	47	5	6	4	15	32766	7	10241	10250	10226	120	163	95	82	61	3	0	3	11	24	5	34	2	54	133	230	91
2017-10-16	55	good	39	60	4	1	42	58	6	8	4	18	32766	19	10280	10306	10250	132	179	94	64	37	0	0	0	11	28	7	45	7	81	129	241	69
2017-10-17	92	good	69	81	3	1.2	49	48	6	8	4	18	32766	10	10249	10270	10230	131	168	85	79	61	0	0	0	9	24	10	33	11	0	131	230	62
2017-10-18	90	good	67	92	3	1.2	46	27	5	6	2	13	32766	3	10202	10235	10182	130	142	123	92	79	24	14	38	13	22	9	37	10	0	130	164	120
2017-10-19	75	good	55	61	2	1.2	38	59	4	5	4	13	32766	10	10171	10191	10148	133	181	103	88	64	0	0	0	15	27	11	44	10	71	152	272	83
2017-10-20	128	mild pollution	98	100	2	1.5	47	59	4	5	3	12	32766	9	10156	10171	10134	131	173	96	90	73	0	0	0	12	29	11	48	11	43	143	254	79
2017-10-21	100	good	75	71	3	1.3	38	72	3	8	3	14	32766	18	10177	10194	10145	137	177	95	75	42	0	0	0	15	40	4	70	5	24	130	220	68
2017-10-22	56	good	38	53	4	1	45	20	3	8	5	16	32766	21	10200	10214	10188	119	145	101	69	47	1	0	1	7	19	5	29	6	0	121	168	89
2017-10-23	50	perfect	35	45	2	0.7	38	52	5	4	7	16	32766	17	10215	10233	10199	117	174	57	70	43	0	0	0	13	28	10	44	4	91	120	257	38
2017-10-24	92	good	69	79	3	1	46	65	4	5	5	14	32766	14	10216	10237	10194	115	181	56	79	51	0	0	0	17	45	11	90	11	86	108	235	31
2017-10-25	140	mild pollution	108	119	3	1.3	56	36	4	7	2	13	32766	12	10206	10226	10190	114	153	69	84	65	0	0	0	9	29	3	42	4	0	106	185	46
2017-10-26	202	severe pollution	152	155	3	1.6	69	25	4	7	3	14	32766	6	10157	10196	10133	121	159	86	87	66	0	0	0	5	13	10	22	11	0	118	199	64
2017-10-27	221	severe pollution	171	0	2	1.6	68	46	3	4	3	10	32766	7	10144	10157	10129	124	168	86	85	64	0	0	0	12	21	12	36	10	25	125	230	66
2017-10-28	62	good	45	46	2	0.7	27	55	4	8	3	15	32766	43	10215	10285	10147	114	139	89	45	19	0	0	0	37	73	1	138	2	26	81	150	33
2017-10-29	33	perfect	8	23	3	0.4	27	57	5	5	2	12	32766	48	10302	10329	10271	87	141	55	26	14	0	0	0	29	64	1	128	16	99	76	237	-8
2017-10-30	58	good	18	43	4	0.6	47	46	4	4	3	11	32766	27	10247	10288	10206	75	161	-4	52	15	0	0	0	16	41	11	76	13	100	69	265	-23
2017-10-31	91	good	60	103	5	1	73	9	3	3	1	7	32766	14	10163	10209	10125	77	148	17	64	37	0	0	0	12	24	10	38	10	78	71	228	-7
2017-11-01	98	good	64	100	3	1.1	79	31	5	7	4	16	37	32766	10148	10175	10132	107	195	53	59	18	0	0	0	11	30	2	51	2	95	104	283	9
2017-11-02	71	good	51	86	6	1	57	56	6	9	5	20	48	32766	10132	10183	10106	122	203	58	49	18	0	0	0	27	45	1	91	1	90	112	272	27
2017-11-03	37	perfect	8	28	2	0.4	30	62	6	9	6	21	45	32766	10277	10306	10183	74	151	31	50	18	0	0	0	17	45	3	74	5	96	76	244	-10
2017-11-04	67	good	36	63	5	0.8	54	47	3	6	4	13	30	32766	10278	10323	10233	61	139	-17	59	34	0	0	0	15	53	11	87	12	94	56	228	-29
2017-11-05	130	mild pollution	100	120	7	1.3	70	37	5	7	2	14	20	32766	10195	10236	10166	66	134	20	74	48	0	0	0	10	24	11	43	11	75	69	221	-11
2017-11-06	201	severe pollution	151	167	5	1.5	70	56	3	7	3	13	19	32766	10143	10175	10120	84	151	36	73	45	0	0	0	10	23	4	37	3	69	81	225	6
2017-11-07	111	mild pollution	84	96	3	1	44	66	5	10	4	19	55	32766	10153	10183	10131	108	193	40	56	13	0	0	0	22	56	16	112	16	85	93	261	8
2017-11-08	63	good	20	45	6	0.8	51	30	6	9	3	18	30	32766	10212	10240	10183	84	144	23	48	29	0	0	0	9	38	10	59	10	83	64	249	-15
2017-11-09	78	good	51	92	6	1.4	63	22	5	10	2	17	17	32766	10150	10201	10114	85	130	41	72	47	0	0	0	10	28	4	43	2	30	87	214	8
2017-11-10	39	perfect	7	39	2	0.3	15	58	3	6	5	14	69	32766	10207	10256	10122	98	136	65	23	18	0	0	0	35	82	14	162	15	91	92	235	23
2017-11-11	46	perfect	17	36	4	0.5	37	36	4	8	6	18	39	32766	10220	10268	10178	43	86	-12	33	19	0	0	0	27	46	11	80	11	92	41	211	-43
2017-11-12	78	good	55	92	6	1	63	15	5	13	6	24	20	32766	10135	10180	10107	38	104	-9	53	28	0	0	0	13	27	10	43	11	56	30	227	-35
2017-11-13	60	good	26	71	3	0.6	31	61	6	10	2	18	50	32766	10140	10177	10112	70	117	-8	33	11	0	0	0	30	71	16	144	2	88	50	215	-36
2017-11-14	32	perfect	10	28	3	0.5	26	62	8	10	1	19	48	32766	10208	10232	10177	27	77	-4	26	11	0	0	0	19	59	1	115	1	91	23	189	-45
2017-11-15	46	perfect	15	37	3	0.5	37	60	12	8	1	21	25	32766	10216	10245	10196	15	65	-26	32	14	0	0	0	12	59	3	101	3	93	16	181	-65
2017-11-16	90	good	57	87	10	1.4	72	19	14	11	0	25	19	32766	10182	10220	10148	16	83	-41	42	24	0	0	0	8	24	9	40	9	75	19	184	-64
2017-11-17	55	good	23	60	4	0.7	32	64	7	20	4	31	39	32766	10232	10306	10154	21	54	-19	30	11	0	0	0	37	79	1	142	1	52	1	94	-52
2017-11-18	54	good	38	59	7	0.6	35	60	7	6	0	13	27	32766	10289	10334	10240	-3	42	-39	21	12	0	0	0	32	57	1	112	1	88	-2	151	-85
2017-11-19	117	mild pollution	89	118	9	1.4	72	17	4	5	6	15	17	32766	10244	10268	10226	-11	50	-59	43	23	0	0	0	12	38	12	62	11	48	-13	155	-85
2017-11-20	135	mild pollution	104	131	10	1.9	85	29	10	24	2	36	17	32766	10235	10261	10212	11	100	-64	48	15	0	0	0	11	36	11	59	11	84	0	183	-89
2017-11-21	158	moderate pollution	121	165	13	2	90	37	9	16	3	28	15	32766	10175	10219	10139	35	94	-36	43	14	0	0	0	24	56	15	112	14	59	16	152	-68
2017-11-22	33	perfect	7	33	3	0.4	18	62	13	15	2	30	49	32766	10216	10233	10179	42	93	-23	25	14	0	0	0	36	65	14	130	15	89	26	182	-64
2017-11-23	30	perfect	7	30	3	0.4	21	52	10	19	1	30	36	32766	10210	10237	10170	21	65	-42	21	11	0	0	0	18	67	15	123	16	79	-5	167	-88
2017-11-24	47	perfect	20	47	6	0.6	34	52	6	7	3	16	34	32766	10210	10243	10173	23	66	-37	24	14	0	0	0	31	63	11	92	12	88	7	161	-86
2017-11-25	76	good	41	77	8	1	61	25	2	16	3	21	19	32766	10158	10176	10132	19	88	-35	46	29	0	0	0	9	35	11	59	11	72	-3	194	-69
2017-11-26	30	perfect	11	28	3	0.4	24	61	10	14	1	25	38	32766	10262	10298	10174	19	61	-15	24	16	0	0	0	28	62	4	115	16	86	17	164	-57
2017-11-27	93	good	70	96	11	1.4	72	13	6	20	1	27	14	32766	10177	10257	10133	-1	56	-38	61	25	0	0	0	16	37	10	65	9	63	-2	146	-71
2017-11-28	64	good	38	78	4	0.9	39	64	14	24	6	44	34	32766	10209	10292	10132	5	70	-33	45	12	0	0	0	21	78	1	149	1	81	2	154	-64
2017-11-29	43	perfect	13	34	4	0.5	35	43	10	12	3	25	24	32766	10312	10342	10291	-30	8	-59	22	14	0	0	0	20	60	3	94	3	66	-22	141	-89
2017-11-30	55	good	17	40	5	0.8	44	17	8	12	4	24	18	32766	10301	10328	10278	-14	34	-65	26	14	0	0	0	24	43	12	78	16	83	-21	151	-103
2017-12-01	87	good	64	99	13	1.2	63	0	10	17	4	31	17	32766	10261	10286	10235	-8	55	-73	40	20	0	0	0	14	31	10	48	10	66	-27	149	-110
2017-12-02	162	moderate pollution	123	157	17	2	87	0	7	10	5	22	8	32766	10189	10236	10161	-14	52	-62	58	33	0	0	0	7	26	11	35	11	77	-28	137	-97
2017-12-03	254	severe pollution	204	246	13	3	121	0	15	28	10	53	26	32766	10235	10266	10184	14	61	-34	40	15	0	0	0	29	56	1	109	1	64	-2	157	-86
2017-12-04	28	perfect	5	13	3	0.5	22	0	22	35	4	61	35	32766	10278	10302	10248	-11	30	-48	21	15	0	0	0	36	69	15	120	14	84	-23	133	-104
2017-12-05	77	good	31	55	7	1	61	0	12	19	7	38	20	32766	10192	10258	10149	4	68	-65	32	17	0	0	0	21	50	12	73	12	69	-18	155	-111
2017-12-06	82	good	46	83	11	1	65	0	11	20	4	35	28	32766	10164	10194	10147	36	101	-31	31	15	0	0	0	20	52	16	90	16	80	8	180	-80
2017-12-07	29	perfect	6	17	3	0.3	23	0	11	25	1	37	35	32766	10260	10302	10194	17	59	-10	27	19	0	0	0	27	57	1	110	16	83	-19	136	-82
2017-12-08	28	perfect	6	15	3	0.5	22	0	15	20	3	38	24	32766	10231	10307	10191	10	77	-38	29	17	0	0	0	19	41	1	85	16	72	-15	157	-91
2017-12-09	77	good	34	60	7	1.4	61	0	22	31	8	61	19	32766	10125	10199	10085	20	91	-35	39	16	0	0	0	11	27	4	42	9	60	2	176	-78
2017-12-10	30	perfect	7	22	4	0.3	24	0	13	22	4	39	48	32766	10180	10216	10106	30	65	1	21	14	0	0	0	42	82	16	143	15	83	7	122	-59
2017-12-11	39	perfect	9	23	3	0.5	31	0	16	33	4	53	29	32766	10263	10293	10214	-24	7	-42	21	11	0	0	0	29	54	3	87	3	86	-17	98	-78
2017-12-12	23	perfect	5	17	3	0.3	18	0	22	40	1	63	14	32766	10300	10321	10272	-51	-18	-75	21	16	0	0	0	17	43	4	65	4	61	-40	110	-107
2017-12-13	65	good	32	50	8	1	52	22	19	23	5	47	11	32766	10325	10350	10286	-47	-6	-86	30	19	0	0	0	14	24	5	44	5	80	-57	107	-132
2017-12-14	97	good	72	86	19	1.9	70	13	25	43	9	77	9	32766	10289	10336	10256	-27	6	-54	43	25	0	0	0	13	29	10	48	11	15	-35	73	-89
2017-12-15	51	good	33	52	7	0.9	34	57	19	40	5	64	20	32766	10285	10313	10258	-4	19	-50	38	16	0	0	0	25	68	15	128	15	58	-8	115	-82
2017-12-16	41	perfect	8	41	2	0.3	12	64	24	23	3	50	34	32766	10327	10344	10313	-22	6	-45	20	16	0	0	0	46	68	15	133	15	80	-27	93	-84
2017-12-17	68	good	28	54	7	0.9	54	56	31	63	18	112	86	32766	10265	10327	10226	-14	54	-78	27	15	0	0	0	21	40	11	70	16	86	-45	147	-135
2017-12-18	47	perfect	12	47	4	0.5	21	63	30	61	12	103	35	32766	10264	10320	10222	12	58	-53	28	15	0	0	0	26	67	16	124	15	84	-16	139	-107
2017-12-19	65	good	38	72	9	0.9	52	33	33	58	11	102	20	32766	10296	10333	10249	-12	50	-58	32	20	0	0	0	22	66	11	101	11	61	-46	121	-122
2017-12-20	53	good	20	43	5	0.6	42	64	28	75	4	107	24	32766	10263	10286	10244	26	86	-40	32	19	0	0	0	17	51	1	88	1	85	-13	178	-100
2017-12-21	98	good	51	76	13	1.4	78	20	34	84	18	136	16	32766	10221	10268	10182	16	91	-46	40	21	0	0	0	14	29	11	41	11	84	-17	192	-103
2017-12-22	72	good	36	62	9	1.2	57	62	52	70	17	139	26	32766	10197	10216	10175	23	102	-50	38	12	0	0	0	17	55	1	92	1	83	-14	184	-104
2017-12-23	79	good	32	58	11	1	63	19	47	87	18	152	15	32766	10191	10228	10161	8	61	-40	37	22	0	0	0	6	29	3	49	3	38	-28	157	-103
2017-12-24	49	perfect	13	49	4	0.5	16	73	50	77	14	141	45	32766	10204	10252	10163	38	62	10	23	17	0	0	0	34	73	16	139	1	82	18	133	-44
2017-12-25	62	good	31	51	10	0.7	49	43	57	86	15	158	25	32766	10220	10256	10186	-7	46	-41	27	16	0	0	0	15	54	11	89	12	75	-28	141	-106
2017-12-26	59	good	23	43	7	0.7	47	47	73	107	28	208	16	32766	10266	10290	10207	-8	39	-59	36	24	0	0	0	18	34	10	57	10	82	-28	152	-119
2017-12-27	99	good	74	85	11	1.5	71	15	68	113	14	195	9	32766	10237	10272	10204	-24	18	-65	70	47	0	0	0	10	29	10	50	9	65	-40	111	-107
2017-12-28	143	mild pollution	109	123	13	1.9	70	19	72	115	32	219	4	32766	10237	10263	10220	-16	19	-46	72	55	0	0	0	14	28	4	49	4	25	-33	99	-95
2017-12-29	225	severe pollution	175	192	6	2.9	86	11	70	107	20	197	2	32766	10267	10289	10241	-27	-12	-54	89	82	0	0	0	9	22	11	32	10	0	-32	52	-99
2017-12-30	145	mild pollution	111	77	5	2	62	52	89	157	38	284	13	32766	10254	10282	10228	4	61	-41	55	13	0	0	0	15	64	15	117	14	33	-24	144	-85
2017-12-31	64	good	33	67	6	1	51	35	95	162	36	293	14	32766	10222	10256	10196	-19	53	-71	37	15	0	0	0	15	35	11	54	11	83	-49	149	-135
2018-01-01	60	good	33	61	10	1.1	48	41	86	137	33	256	16	32766	10238	10259	10210	-22	32	-63	38	19	0	0	0	16	38	4	56	3	80	-52	133	-135
2018-01-02	49	perfect	27	49	7	0.9	35	50	58	136	29	223	20	32766	10307	10333	10251	-16	27	-73	45	17	0	0	0	17	44	1	91	15	70	-38	121	-126
2018-01-03	29	perfect	11	28	5	0.4	23	55	69	158	28	255	35	32766	10356	10381	10334	-20	11	-42	20	15	0	0	0	32	62	2	115	1	70	-36	92	-96
2018-01-04	44	perfect	15	29	5	0.5	35	42	57	131	26	214	18	32766	10305	10349	10269	-36	-8	-53	27	18	0	0	0	19	51	1	91	1	0	-46	33	-79
2018-01-05	69	good	32	53	9	1	55	39	80	148	40	268	8	32766	10235	10270	10208	-31	34	-86	36	17	0	0	0	14	31	12	49	14	80	-53	154	-144
2018-01-06	52	good	16	29	6	0.6	41	53	84	140	34	258	15	32766	10238	10266	10218	-14	31	-63	25	15	0	0	0	18	36	3	59	2	70	-36	145	-147
2018-01-07	59	good	38	57	11	0.9	47	55	58	139	39	236	13	32766	10183	10223	10160	2	34	-20	35	24	0	0	0	15	44	16	92	16	0	-2	114	-71
2018-01-08	55	good	12	60	4	0.3	12	66	51	116	32	199	32	32766	10153	10182	10120	-19	7	-40	27	20	0	0	0	48	72	15	141	3	80	-23	101	-81
2018-01-09	35	perfect	7	34	3	0.3	14	69	62	143	34	239	29	32766	10170	10201	10143	-27	6	-55	27	16	0	0	0	33	81	15	165	15	90	-47	104	-127
2018-01-10	35	perfect	6	20	3	0.3	10	69	42	150	35	227	30	32766	10253	10290	10200	-48	-13	-77	19	13	0	0	0	43	72	16	144	14	90	-50	88	-123
2018-01-11	34	perfect	12	23	5	0.5	27	60	59	177	34	270	23	32766	10324	10354	10290	-60	-15	-89	19	11	0	0	0	34	59	1	105	1	90	-65	111	-128
2018-01-12	94	good	59	79	12	1.4	75	23	53	155	23	231	12	32766	10268	10323	10234	-49	36	-112	34	15	0	0	0	13	35	11	51	11	80	-67	153	-169
2018-01-13	137	mild pollution	104	120	16	1.8	86	18	64	150	35	249	10	32766	10225	10252	10200	-38	36	-93	48	24	0	0	0	11	23	9	38	8	80	-60	156	-152
2018-01-14	175	moderate pollution	132	137	14	1.8	77	45	78	174	42	294	11	32766	10172	10204	10148	-17	70	-67	58	26	0	0	0	13	39	11	63	11	60	-42	147	-126
2018-01-15	64	good	32	57	9	1	51	46	48	141	29	218	14	32766	10204	10241	10167	-20	24	-51	43	29	0	0	0	15	28	2	53	3	20	-55	114	-123
2018-01-16	114	mild pollution	45	178	6	0.8	46	60	54	173	38	265	20	32766	10155	10188	10125	7	53	-33	41	21	0	0	0	17	59	16	104	1	80	0	185	-91
2018-01-17	77	good	41	103	9	1.1	53	67	47	203	45	295	26	32766	10151	10193	10115	11	71	-47	34	11	0	0	0	23	74	16	135	14	60	-3	163	-96
2018-01-18	101	mild pollution	62	104	12	1.3	81	21	48	143	43	234	15	32766	10211	10232	10188	-14	51	-72	36	17	0	0	0	15	27	1	42	16	80	-44	177	-133
2018-01-19	107	mild pollution	80	121	15	1.6	80	40	63	178	40	281	16	32766	10187	10208	10164	-3	85	-66	43	16	0	0	0	14	38	11	57	12	90	-28	212	-131
2018-01-20	65	good	31	75	9	0.9	52	35	35	158	28	221	13	32766	10205	10224	10186	-14	30	-63	49	28	0	0	0	20	39	5	74	7	60	-31	141	-130
2018-01-21	63	good	36	76	21	1.3	48	32	45	153	39	237	16	32766	10219	10244	10193	-35	-7	-45	42	31	0	0	0	23	37	7	70	7	0	-24	45	-71
2018-01-22	46	perfect	22	46	5	0.7	28	71	39	151	37	227	14	32766	10210	10235	10195	-46	-29	-57	46	14	999990	0	0	29	50	16	104	1	60	-35	105	-91
2018-01-23	33	perfect	11	30	4	0.5	17	66	28	117	31	176	21	32766	10269	10296	10235	-92	-47	-123	17	11	0	0	0	34	66	16	124	1	90	-87	97	-173
2018-01-24	39	perfect	17	31	6	0.5	31	71	30	108	26	164	18	32766	10286	10307	10263	-72	-14	-129	24	11	0	0	0	25	45	12	84	16	90	-84	130	-199
2018-01-25	37	perfect	9	22	4	0.4	29	68	26	89	19	134	16	32766	10340	10371	10293	-80	-47	-106	25	15	0	0	0	17	53	3	85	4	90	-85	96	-174
2018-01-26	58	good	27	39	8	0.7	46	45	21	112	30	163	13	32766	10341	10365	10311	-82	-47	-115	35	19	0	0	0	17	26	4	54	7	80	-80	96	-185
2018-01-27	108	mild pollution	81	92	15	1.5	74	16	28	62	17	107	8	32766	10282	10321	10243	-72	-39	-115	49	31	0	0	0	10	25	12	40	13	0	-85	61	-167
2018-01-28	58	good	11	65	3	0.4	16	72	28	98	25	151	23	32766	10271	10308	10239	-62	-23	-110	20	13	0	0	0	37	79	1	148	1	90	-50	113	-154
2018-01-29	55	good	8	60	4	0.4	21	73	19	129	27	175	24	32766	10251	10271	10232	-32	2	-56	23	17	0	0	0	31	60	15	112	16	80	-57	163	-132
2018-01-30	37	perfect	11	36	6	0.4	26	74	19	110	22	151	29	32766	10222	10241	10197	-4	50	-66	21	12	0	0	0	24	69	15	131	15	90	-22	186	-152
2018-01-31	62	good	22	73	7	0.5	32	71	18	94	19	131	27	32766	10256	10275	10229	4	43	-26	19	13	0	0	0	30	43	11	70	16	90	-16	203	-118
2018-02-01	67	good	30	84	11	0.8	39	70	15	69	14	98	21	32766	10242	10273	10223	-18	50	-79	32	15	0	0	0	17	52	16	100	1	80	-19	197	-147
2018-02-02	37	perfect	8	29	5	0.4	12	74	19	106	19	144	39	32766	10343	10372	10273	-37	20	-65	20	14	0	0	0	42	68	15	117	1	90	-31	112	-101
2018-02-03	35	perfect	8	20	5	0.4	22	70	13	64	14	91	24	32766	10334	10357	10303	-46	5	-96	23	13	0	0	0	23	54	15	105	16	90	-56	152	-175
2018-02-04	44	perfect	19	35	9	0.6	35	60	13	90	21	124	22	32766	10296	10337	10250	-43	22	-111	26	16	0	0	0	22	57	11	83	16	90	-51	168	-176
2018-02-05	37	perfect	7	18	3	0.3	16	73	7	68	16	91	28	32766	10303	10324	10278	-45	-2	-85	21	12	0	0	0	35	61	1	114	1	90	-50	123	-136
2018-02-06	70	good	46	60	14	0.9	56	47	3	55	19	77	17	32766	10246	10306	10199	-56	18	-121	32	17	0	0	0	20	44	11	73	12	80	-64	144	-187
2018-02-07	51	good	32	51	9	0.7	34	83	5	63	15	83	26	32766	10225	10247	10190	-24	10	-81	25	15	0	0	0	33	83	1	152	1	100	-33	138	-154
2018-02-08	73	good	52	75	12	1	58	53	7	45	18	70	20	32766	10175	10251	10127	-52	14	-111	36	16	0	0	0	22	60	10	88	13	60	-82	140	-181
2018-02-09	79	good	40	108	9	0.8	35	81	10	82	14	106	27	32766	10173	10254	10122	-26	37	-74	32	6	0	0	0	33	102	1	186	1	60	-45	133	-138
2018-02-10	43	perfect	10	43	3	0.4	13	81	8	47	11	66	33	32766	10260	10281	10240	-52	-11	-105	18	10	0	0	0	29	76	15	146	14	90	-70	111	-177
2018-02-11	66	good	9	82	2	0.3	7	80	2	27	8	37	28	32766	10235	10250	10222	-36	-14	-64	18	12	0	0	0	45	76	15	163	15	100	-30	108	-149
2018-02-12	53	good	12	55	4	0.4	16	80	5	43	11	59	33	32766	10198	10242	10165	4	55	-59	17	12	0	0	0	30	66	15	134	13	100	-4	192	-140
2018-02-13	80	good	59	80	14	1.2	62	55	4	50	10	64	22	32766	10096	10165	10043	-7	92	-64	25	11	0	0	0	13	35	12	71	12	90	-14	248	-134
2018-02-14	41	perfect	13	33	4	0.4	19	81	4	63	22	89	35	32766	10166	10213	10056	19	64	-29	22	16	0	0	0	20	61	2	112	16	40	-11	140	-98
2018-02-15	73	good	53	66	11	0.6	24	87	9	69	23	101	22	32766	10207	10243	10161	-10	55	-84	27	17	0	0	0	19	47	12	81	11	90	-23	210	-153
2018-02-16	105	mild pollution	79	100	15	0.6	26	93	7	43	19	69	43	32766	10173	10192	10148	17	81	-57	21	8	0	0	0	24	73	1	117	1	90	9	238	-128
2018-02-17	108	mild pollution	81	91	11	1.4	38	53	8	55	28	91	11	32766	10201	10226	10180	-16	23	-59	61	16	0	0	0	22	31	5	50	3	10	-22	139	-119
2018-02-18	152	moderate pollution	116	109	16	1.9	50	88	9	57	15	81	16	32766	10201	10218	10176	4	81	-62	56	30	0	0	0	13	25	12	41	12	100	9	261	-107
2018-02-19	188	moderate pollution	141	131	26	2.2	46	76	4	46	17	67	16	32766	10216	10236	10184	4	50	-29	65	44	0	0	0	13	30	7	56	7	50	5	191	-78
2018-02-20	63	good	45	42	7	0.7	23	93	6	34	15	55	38	32766	10234	10259	10209	27	75	-3	37	10	0	0	0	23	48	1	78	1	70	47	258	-63
2018-02-21	48	perfect	33	43	7	0.6	28	88	8	63	28	99	30	32766	10200	10239	10154	10	89	-62	39	12	0	0	0	15	49	12	81	12	70	10	281	-130
2018-02-22	46	perfect	18	46	6	0.5	31	84	9	60	13	82	32	32766	10132	10170	10103	28	96	-54	18	9	0	0	0	10	35	15	65	15	100	13	311	-128
2018-02-23	53	good	23	55	6	0.6	32	86	7	33	11	51	35	32766	10143	10196	10107	35	121	-46	27	11	0	0	0	19	54	16	111	1	90	41	283	-112
2018-02-24	62	good	29	73	11	0.7	23	71	10	69	9	88	38	32766	10294	10332	10197	-3	85	-38	30	11	0	0	0	28	58	6	94	6	80	20	227	-97
2018-02-25	82	good	60	71	11	0.9	47	72	13	67	17	97	22	32766	10215	10279	10172	-10	63	-73	47	27	0	0	0	18	46	9	69	10	80	13	259	-121
2018-02-26	163	moderate pollution	124	122	22	1.7	75	94	14	75	12	101	25	32766	10147	10176	10118	25	105	-32	51	27	0	0	0	15	38	4	57	5	90	36	284	-85
2018-02-27	219	severe pollution	169	171	13	2	56	72	8	48	15	71	16	32766	10185	10219	10146	27	51	-5	62	43	0	0	0	19	50	6	81	6	0	37	165	-65
2018-02-28	117	mild pollution	88	118	10	1.1	37	80	19	44	4	67	27	32766	10083	10175	10018	36	81	3	37	15	0	0	0	30	65	15	132	14	0	55	197	-27
2018-03-01	50	perfect	17	50	4	0.4	18	87	9	44	3	56	59	32766	10155	10188	10076	39	87	-24	17	10	0	0	0	33	83	16	162	15	110	66	310	-96
2018-03-02	105	mild pollution	79	105	19	1.1	56	71	4	38	4	46	35	32766	10062	10136	10013	29	98	-14	32	19	0	0	0	13	46	10	72	11	90	65	297	-58
2018-03-03	221	severe pollution	171	196	19	2	79	57	15	62	12	89	29	32766	10014	10053	9988	63	114	14	55	33	0	0	0	16	29	3	53	6	20	76	272	-37
2018-03-04	126	mild pollution	58	202	7	0.9	38	51	10	31	12	53	38	32766	10157	10203	10054	55	87	31	47	31	0	0	0	20	39	8	70	9	10	67	249	6
2018-03-05	90	good	48	129	9	0.9	45	71	11	44	13	68	33	32766	10250	10276	10203	18	82	-36	42	19	0	0	0	21	58	9	90	9	80	41	272	-93
2018-03-06	63	good	45	64	11	0.9	41	69	10	16	4	30	26	32766	10302	10334	10259	-1	49	-41	49	27	0	0	0	25	48	9	78	9	70	43	262	-80
2018-03-07	64	good	46	63	9	0.8	51	48	11	31	7	49	16	32766	10242	10305	10192	-4	32	-32	49	33	0	0	0	16	34	9	56	7	0	6	202	-65
2018-03-08	61	good	43	72	6	0.7	37	76	10	36	4	50	31	32766	10282	10314	10236	17	66	-45	38	23	0	0	0	27	45	12	74	12	110	49	297	-106
2018-03-09	137	mild pollution	104	107	13	1.3	72	79	13	25	7	45	33	32766	10191	10265	10129	24	97	-44	45	31	0	0	0	18	44	11	81	11	90	55	288	-87
2018-03-10	156	moderate pollution	119	128	16	1.5	63	110	10	21	3	34	41	32766	10179	10204	10132	55	124	2	45	31	0	0	0	19	40	8	65	6	100	79	307	-64
2018-03-11	85	good	63	69	18	1.4	50	65	14	35	9	58	25	32766	10198	10228	10158	33	71	-30	43	30	0	0	0	11	33	7	90	6	0	47	251	-80
2018-03-12	195	moderate pollution	146	141	11	1.7	75	91	13	28	6	47	31	32766	10095	10160	10052	60	124	-5	63	39	0	0	0	15	32	11	57	11	80	84	303	-43
2018-03-13	294	severe pollution	244	198	11	2.1	100	151	10	18	5	33	39	32766	10049	10066	10028	95	196	21	54	27	0	0	0	10	23	3	38	9	80	114	364	-31
2018-03-14	287	severe pollution	237	185	17	2.6	79	86	12	28	5	45	36	32766	10049	10067	10025	113	147	74	63	49	0	0	0	27	41	5	64	5	40	131	314	34
2018-03-15	62	good	20	74	3	0.4	18	95	20	33	4	57	85	32766	10197	10255	10037	103	149	73	23	7	0	0	0	46	73	4	122	3	70	131	302	38
2018-03-16	55	good	33	60	8	0.6	31	95	7	18	6	31	45	32766	10274	10312	10233	41	97	-12	45	26	0	0	0	24	54	11	95	10	100	91	327	-67
2018-03-17	83	good	61	60	5	0.9	62	29	6	16	5	27	13	32766	10217	10247	10198	13	65	-1	71	34	4	37	41	11	43	8	68	7	0	5	41	-15
2018-03-18	138	mild pollution	105	73	3	1	56	88	8	14	2	24	28	32766	10191	10210	10164	56	123	6	73	39	0	0	0	14	33	10	50	11	90	94	281	-10
2018-03-19	94	good	70	60	4	0.8	47	97	5	17	4	26	42	32766	10212	10229	10189	83	150	13	56	19	0	0	0	13	37	8	67	5	90	106	328	-21
2018-03-20	44	perfect	23	39	4	0.5	35	87	6	11	4	21	45	32766	10251	10278	10223	72	111	22	28	14	0	0	0	16	43	6	74	5	80	89	292	-15
2018-03-21	80	good	59	83	9	0.9	56	75	16	19	9	44	41	32766	10185	10237	10139	57	113	-16	33	19	0	0	0	27	45	10	72	10	70	77	284	-56
2018-03-22	115	mild pollution	87	104	8	1	66	96	7	13	1	21	58	32766	10100	10143	10067	101	186	7	35	18	0	0	0	15	48	12	86	11	100	130	391	-38
2018-03-23	144	mild pollution	110	132	12	1.4	90	64	10	26	3	39	46	32766	10101	10126	10078	124	213	61	41	19	0	0	0	14	29	10	47	10	50	132	355	30
2018-03-24	120	mild pollution	91	102	10	1.2	63	118	4	9	1	14	67	32766	10170	10198	10126	144	234	40	39	12	0	0	0	16	49	11	72	11	100	169	456	-13
2018-03-25	78	good	57	95	7	0.7	59	128	4	21	5	30	92	32766	10139	10165	10106	175	274	55	25	9	0	0	0	23	54	11	86	11	110	200	486	-5
2018-03-26	162	moderate pollution	123	142	13	1.1	76	141	3	3	1	7	75	32766	10088	10122	10052	178	248	98	39	20	0	0	0	18	44	11	69	11	90	194	440	36
2018-03-27	247	severe pollution	197	196	12	1.4	103	119	25	29	6	60	48	32766	10020	10060	9980	174	256	94	51	27	0	0	0	13	34	11	54	9	60	183	441	50
2018-03-28	0	无	0	0	6	0.9	52	75	10	24	4	38	72	32766	10078	10126	9995	196	224	147	33	20	0	0	0	22	46	3	95	2	70	202	352	107
2018-03-29	112	mild pollution	39	173	13	0.8	46	88	9	20	0	29	75	32766	10202	10235	10126	153	203	113	27	17	0	0	0	24	59	9	106	10	90	185	406	75
2018-03-30	69	good	41	85	8	0.6	55	104	4	9	2	15	71	32766	10186	10238	10125	134	190	64	25	13	0	0	0	22	48	10	75	11	70	176	425	22
2018-03-31	137	mild pollution	104	155	13	1.1	85	120	5	14	7	26	32766	32766	10098	10138	10053	166	240	108	32	19	0	0	0	11	38	11	52	10	90	210	460	80
