# Supplementary material for: Air pollutants and outpatient visits for influenza-like illness in Beijing, China
Source: PeerJ journal article supplement (doi:10.7717/peerj.11397), 2021-06-02
Supplement: Supplemental_Table_1.docx [file Supplemental_Table_1.docx]

**Supplemental Table 1.** Demographic characteristics of outpatient visits of influenza like illness at fever clinic in the hospital from January 1, 2015 to March 31, 2018

| Variable | 2015 | | |  | 2016 | | |  | 2017 | | |  | 2018 | | | P |
| --- | --- | --- | --- | --- | --- | --- | --- | --- | --- | --- | --- | --- | --- | --- | --- | --- |
| No. | Median | IQR |  | No. | Median | IQR |  | No. | Median | IQR |  | No. | Median | IQR |
| ILI cases | 6265 | 13 | 10-18 |  | 7832 | 15 | 11-26 |  | 11485 | 21 | 16-32 |  | 10280 | 86 | 47-176 | <0.001 |
| 15-24 years | 1994 | 4 | 3-5 |  | 2204 | 4 | 3-7 |  | 3721 | 7 | 5-10 |  | 2044 | 13 | 7-30 | <0.001 |
| 25-60 years | 3177 | 6 | 5-9 |  | 3895 | 7 | 5-13 |  | 5591 | 10 | 7-15 |  | 6661 | 61 | 29-117 | <0.001 |
| >60 years | 1094 | 3 | 2-4 |  | 1733 | 4 | 2-6 |  | 2173 | 4 | 3-7 |  | 1575 | 15 | 6-28 | <0.001 |
