# Supplementary figures and images for: Air pollutants and outpatient visits for influenza-like illness in Beijing, China
Source: PeerJ journal article supplement (doi:10.7717/peerj.11397), 2021-06-02

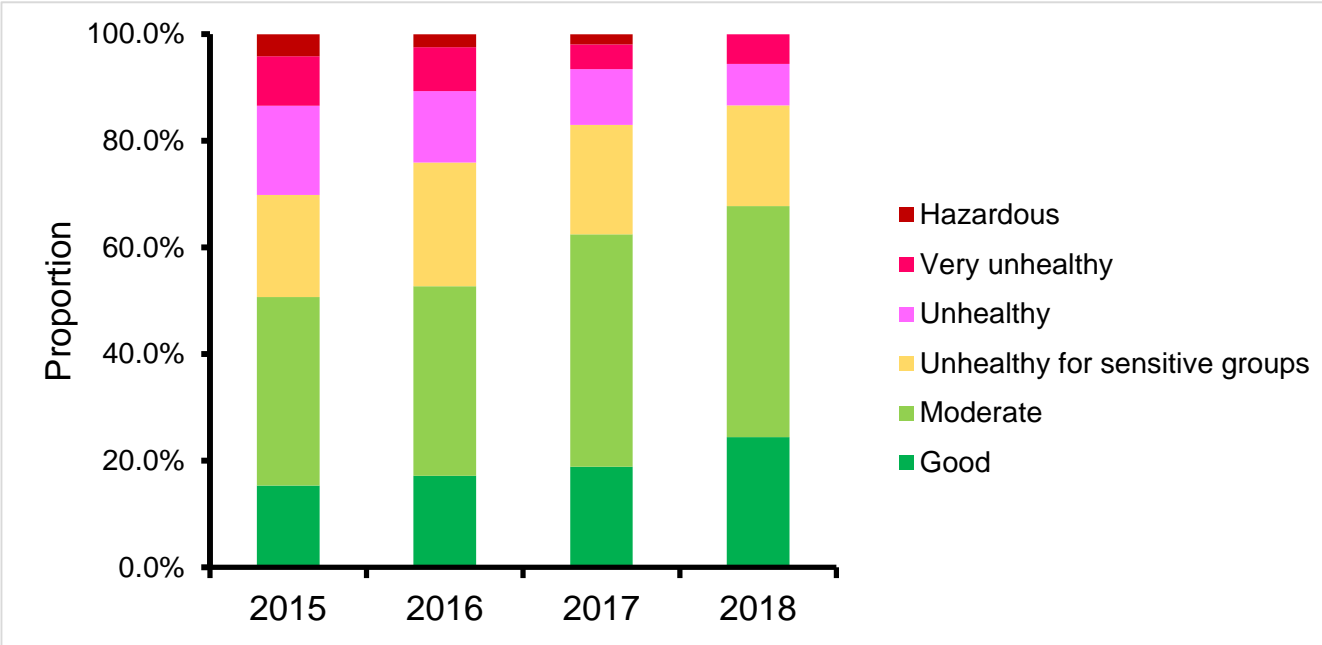

Supplement: Supplemental_Figure_1_20210325.pdf [file Supplemental_Figure_1_20210325.pdf]

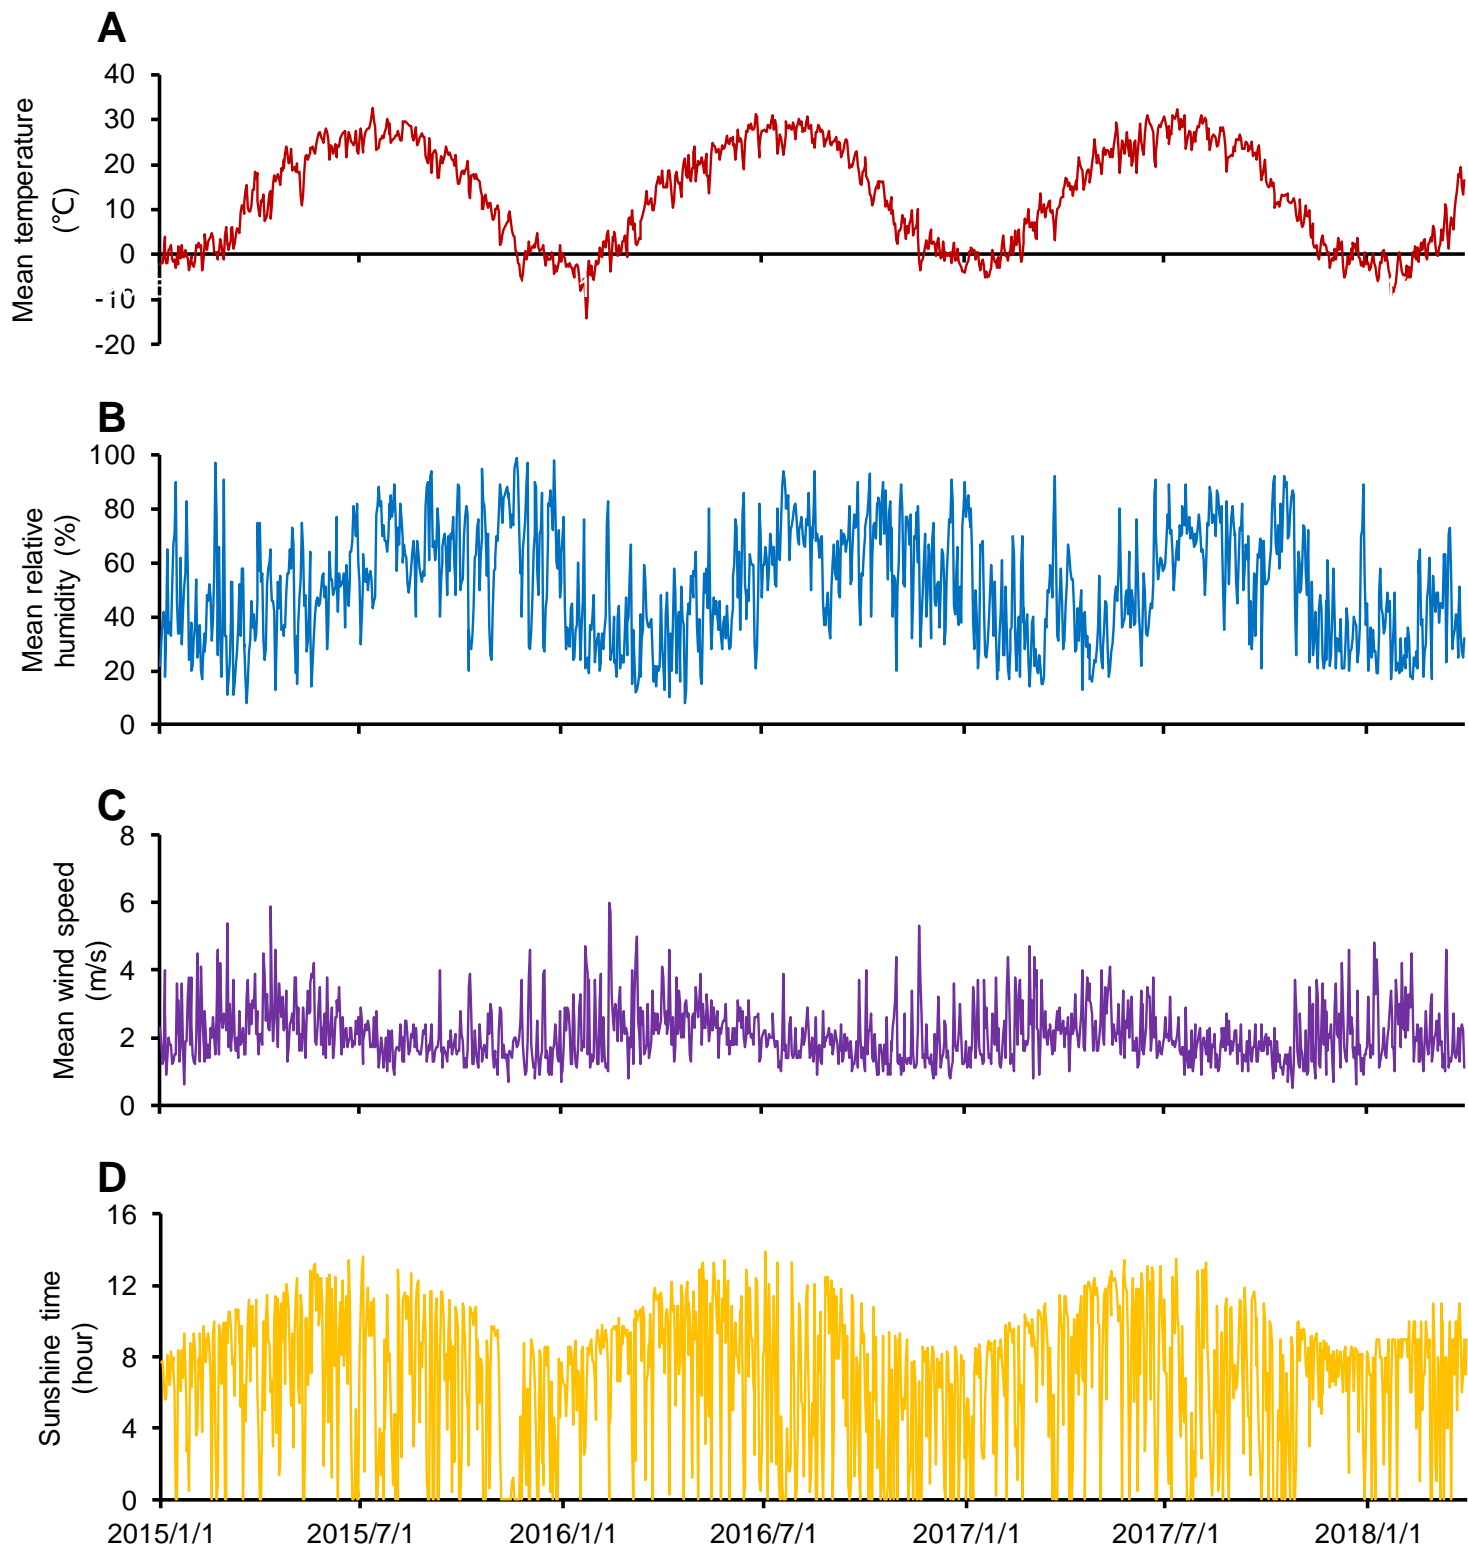

Supplement: Supplemental_Figure_2_20210325.pdf [file Supplemental_Figure_2_20210325.pdf]

**A**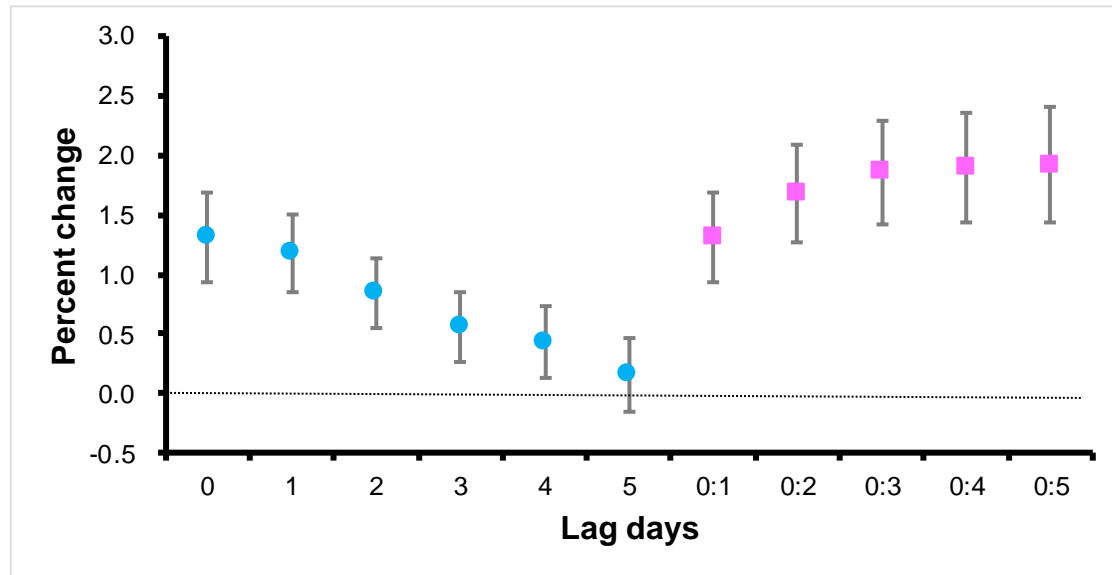**B**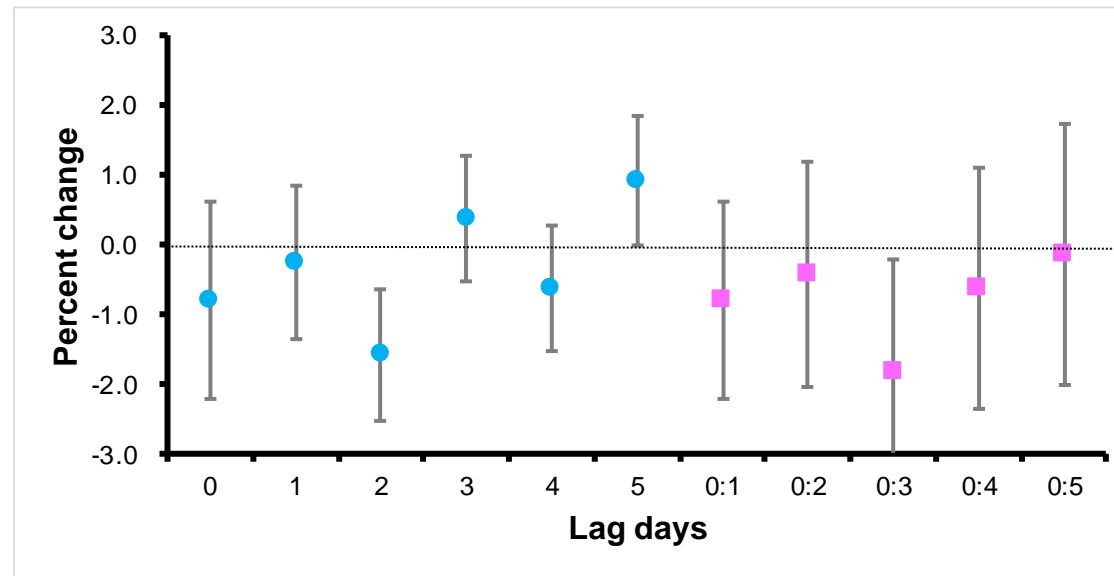**C**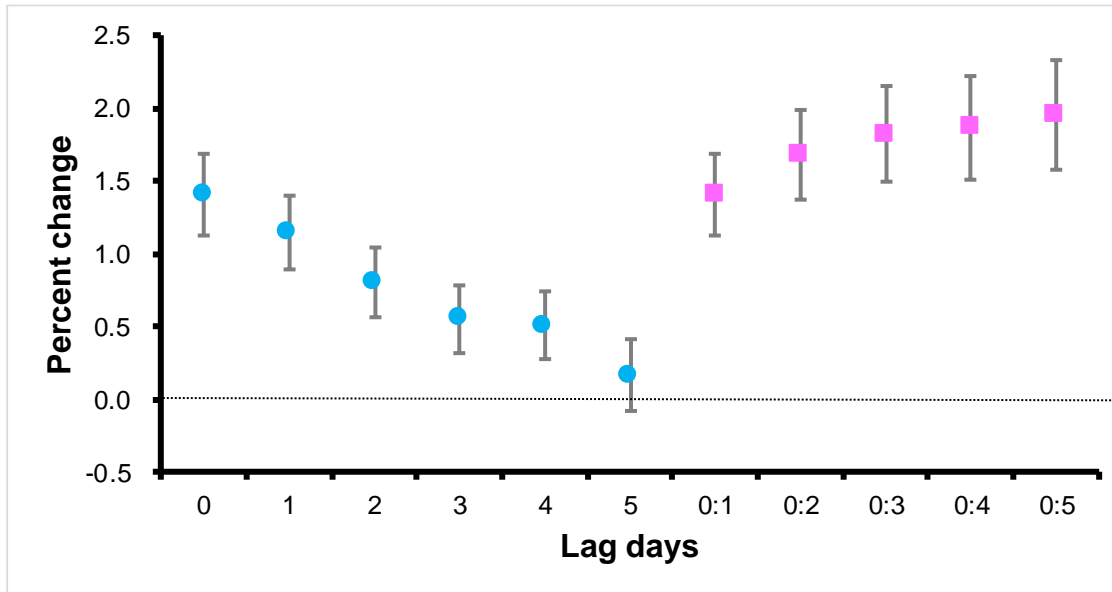**D**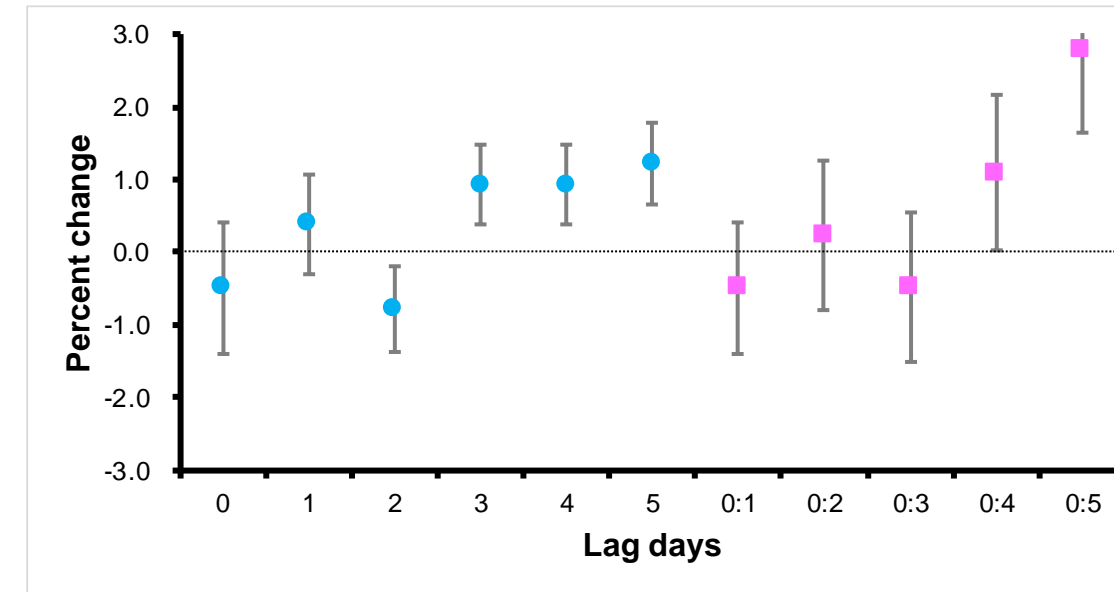**E**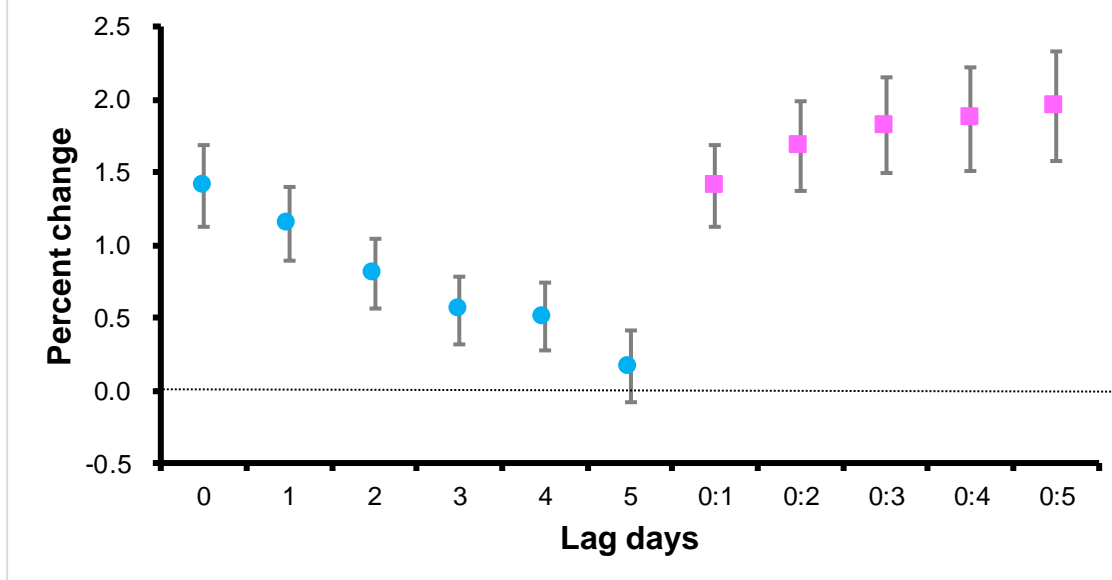**F**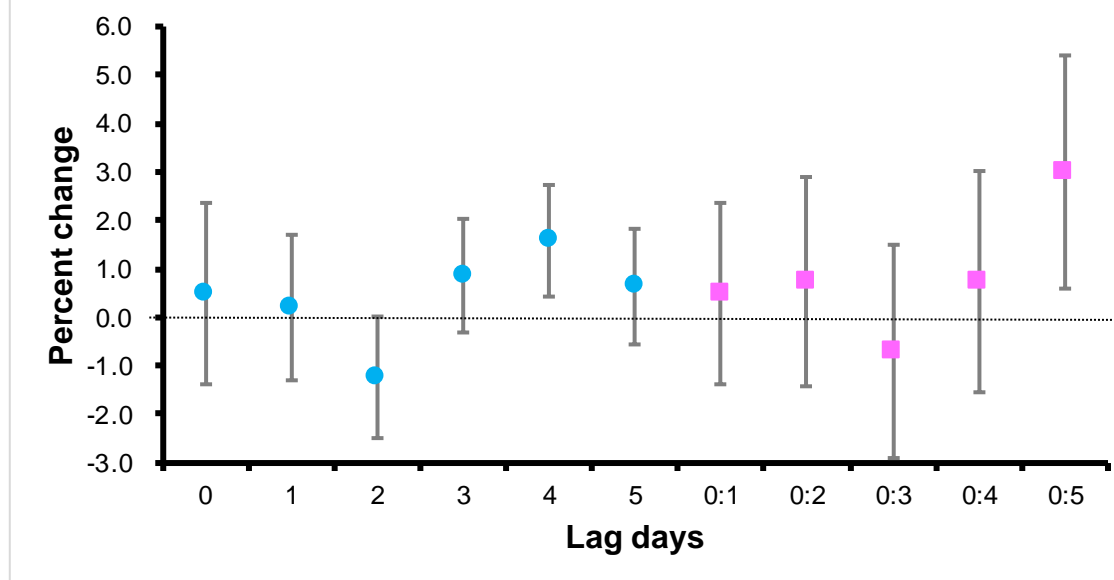

Supplement: Supplemental_Figure_3_20210325.pdf [file Supplemental_Figure_3_20210325.pdf]

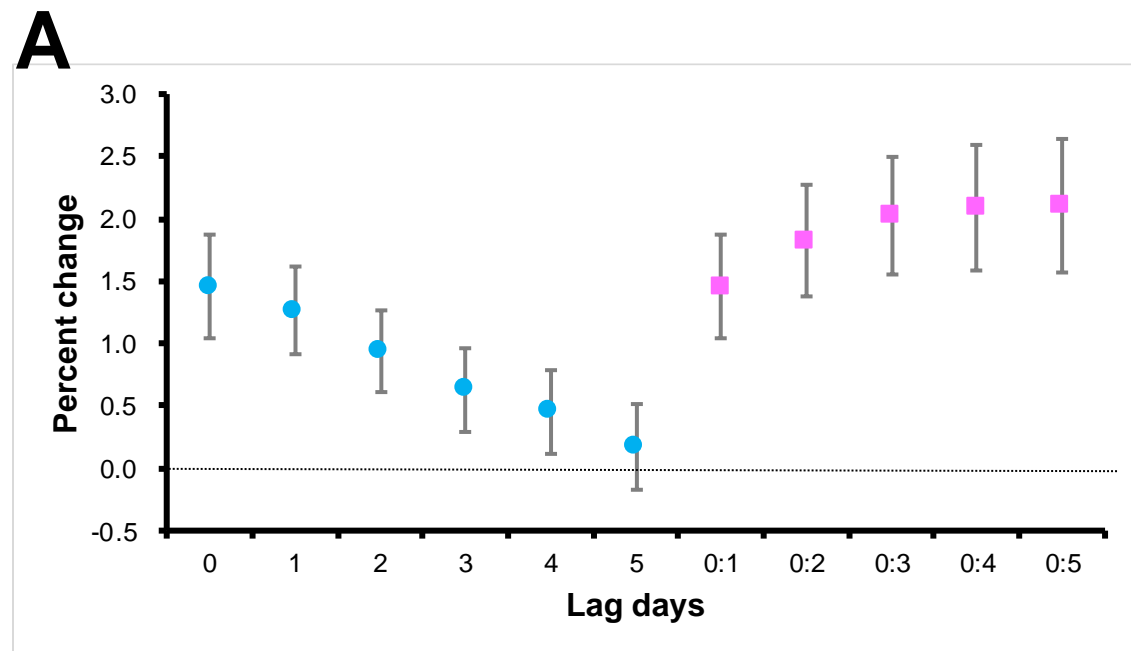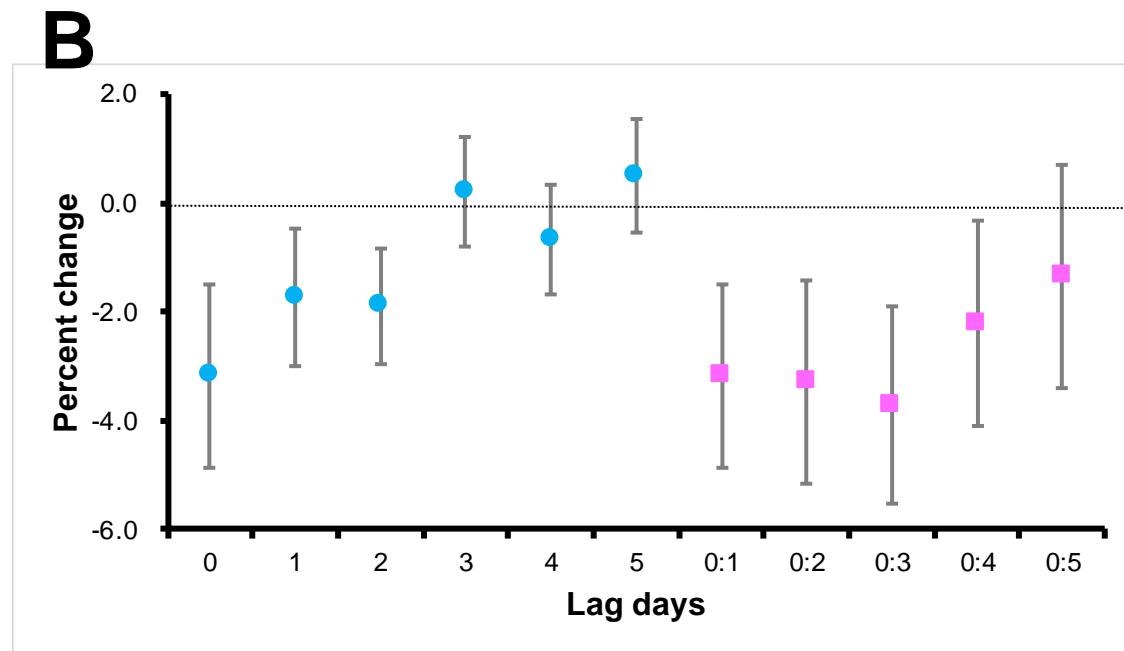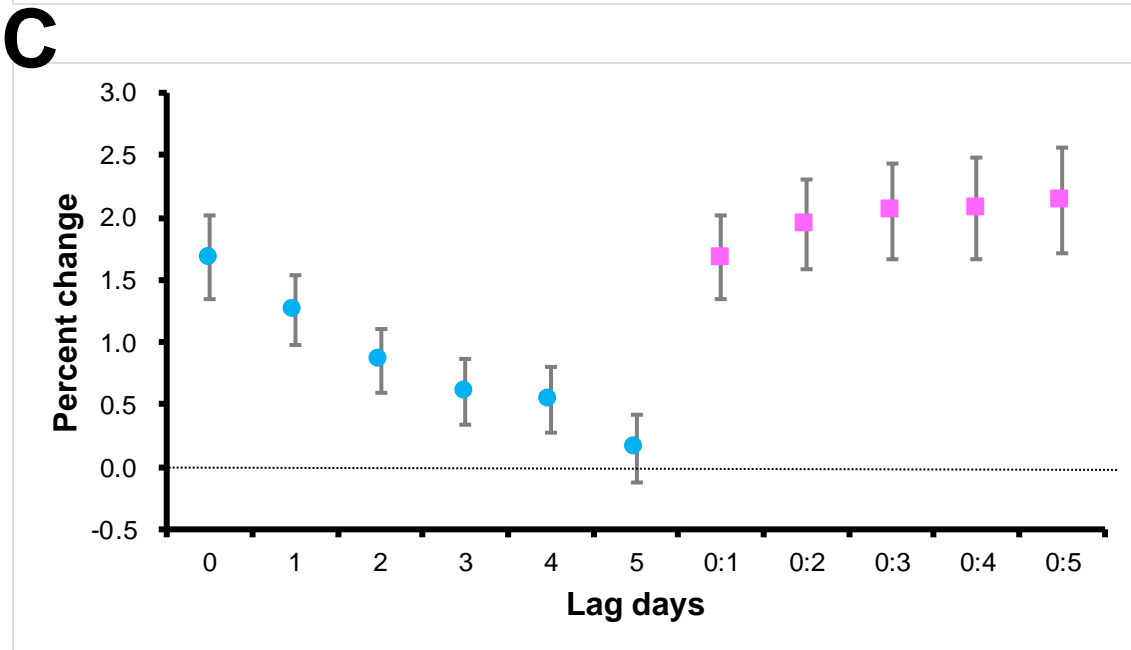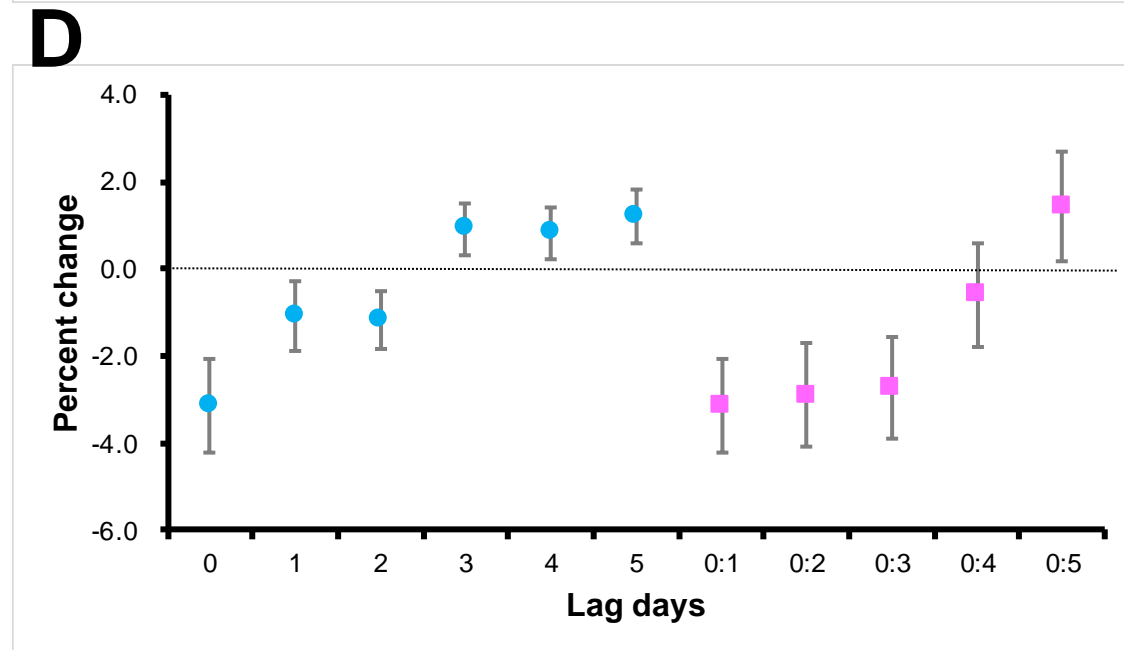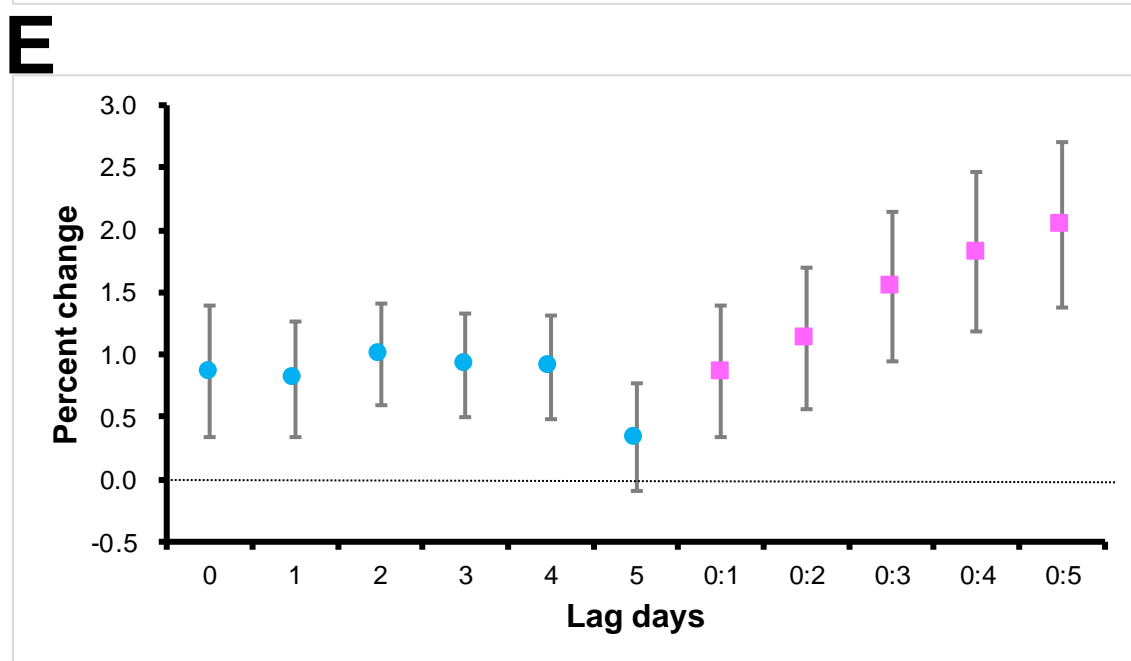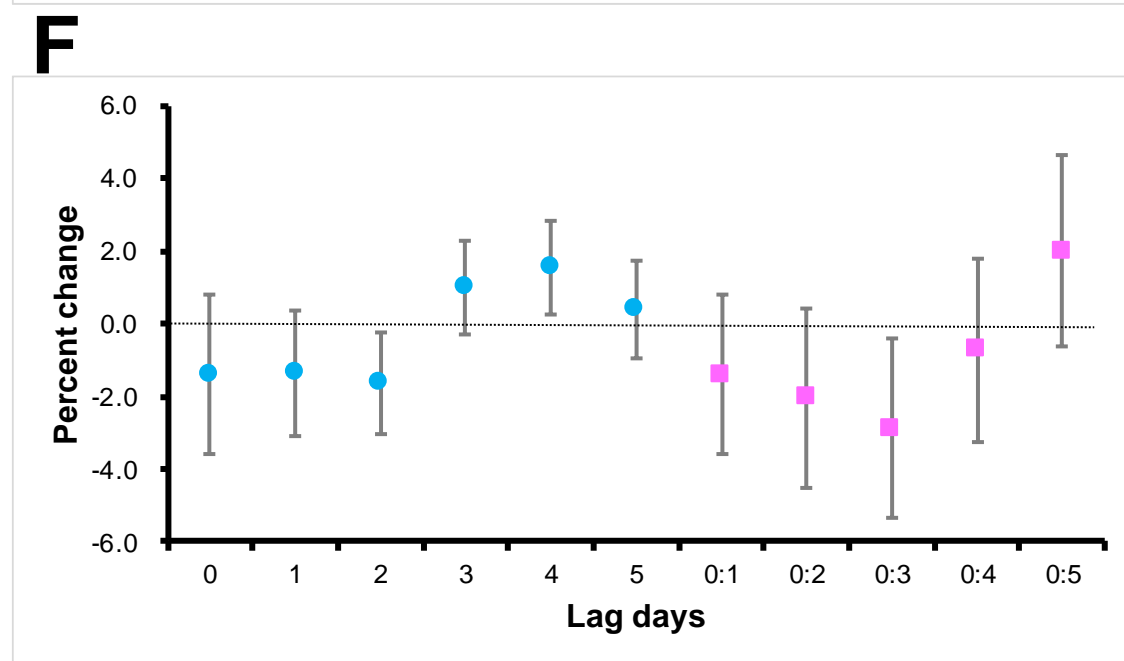

Supplement: Supplemental_Figure_4_20210325.pdf [file Supplemental_Figure_4_20210325.pdf]

**A**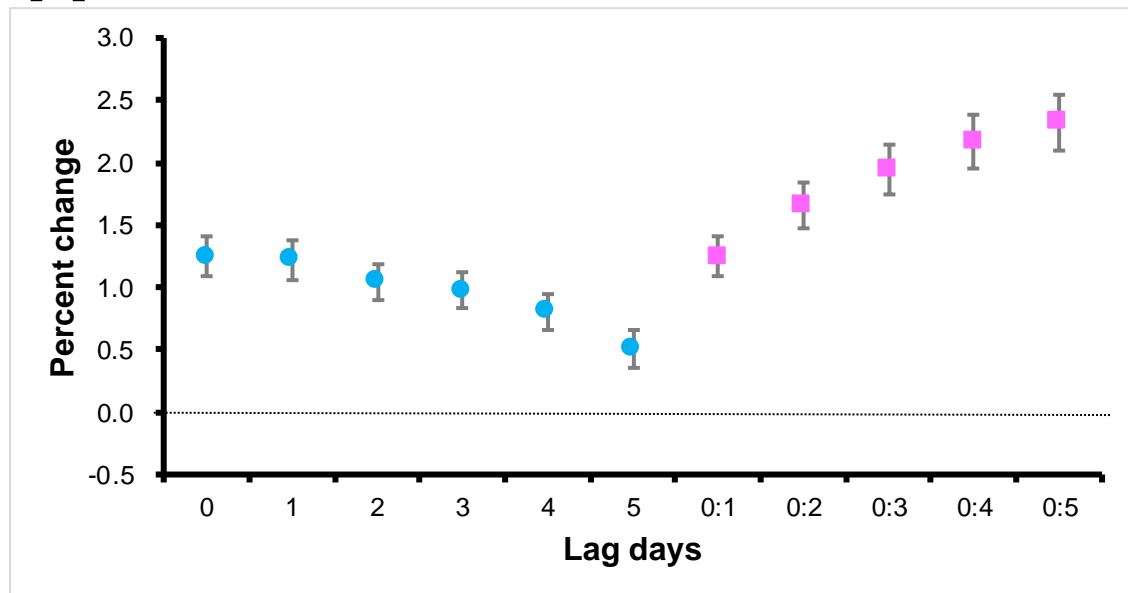**B**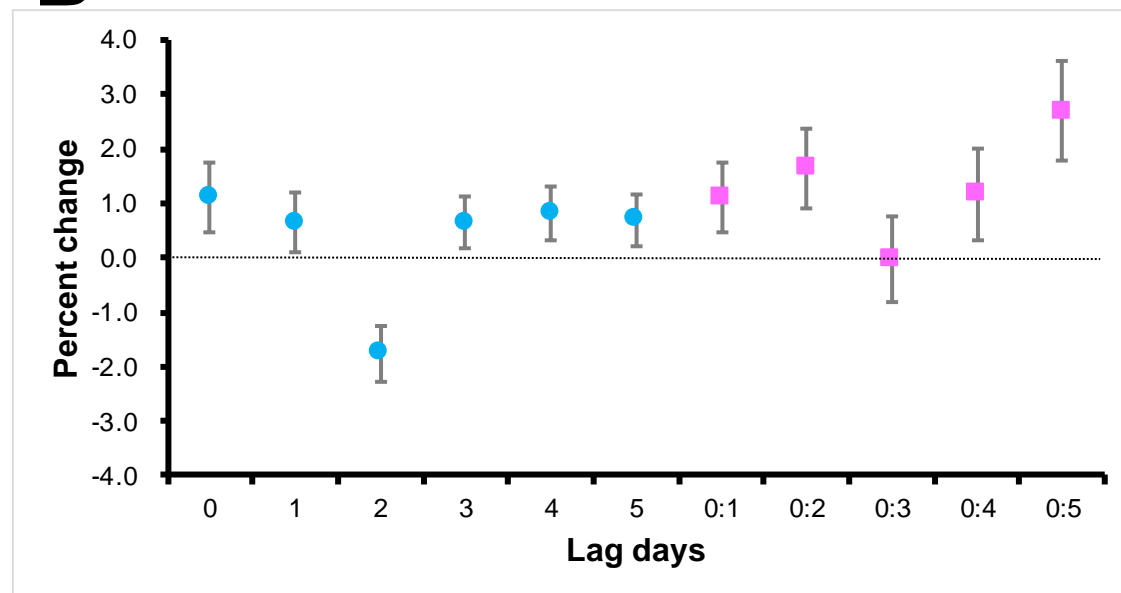**C**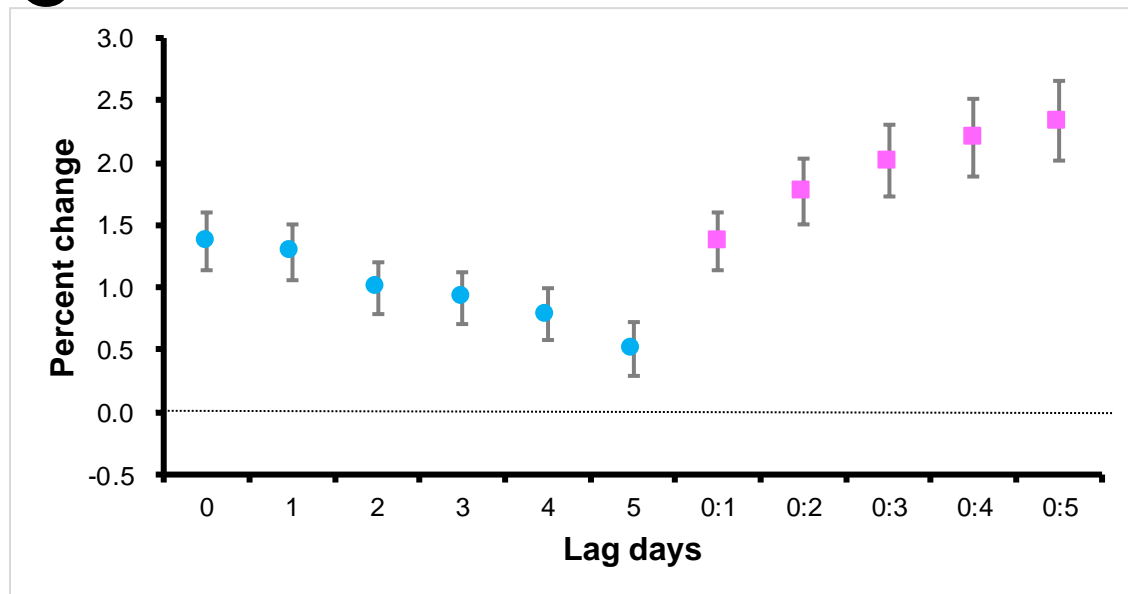**D**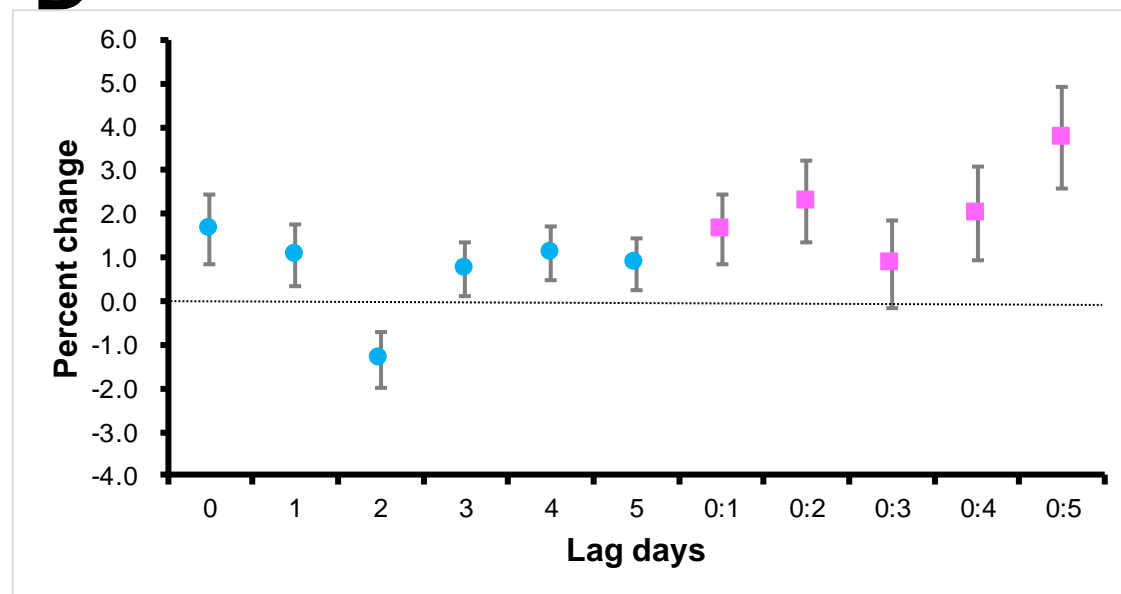**E**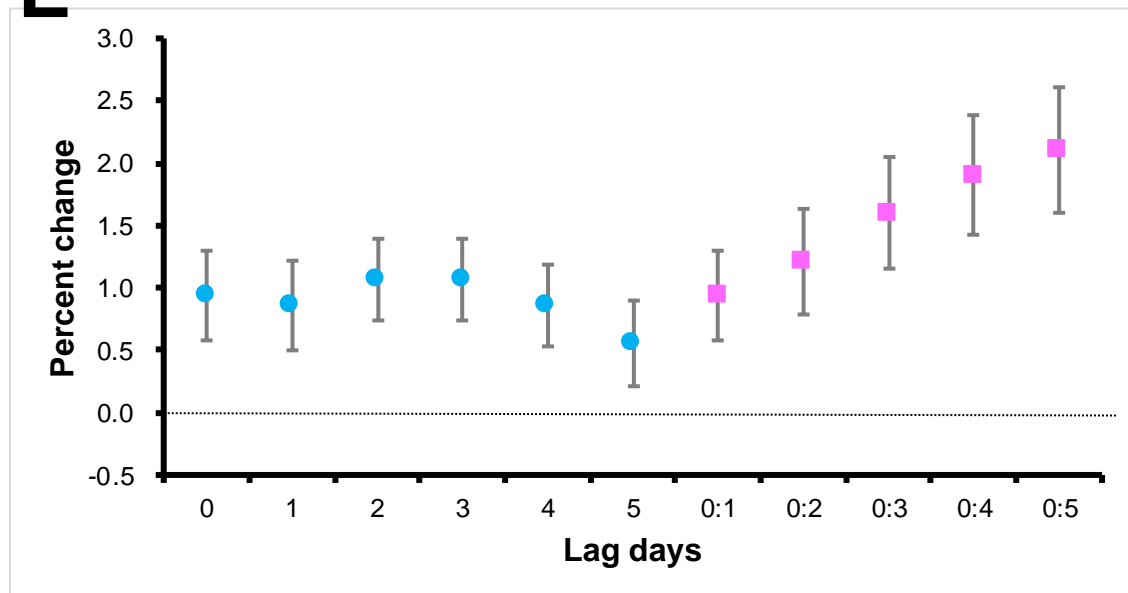**F**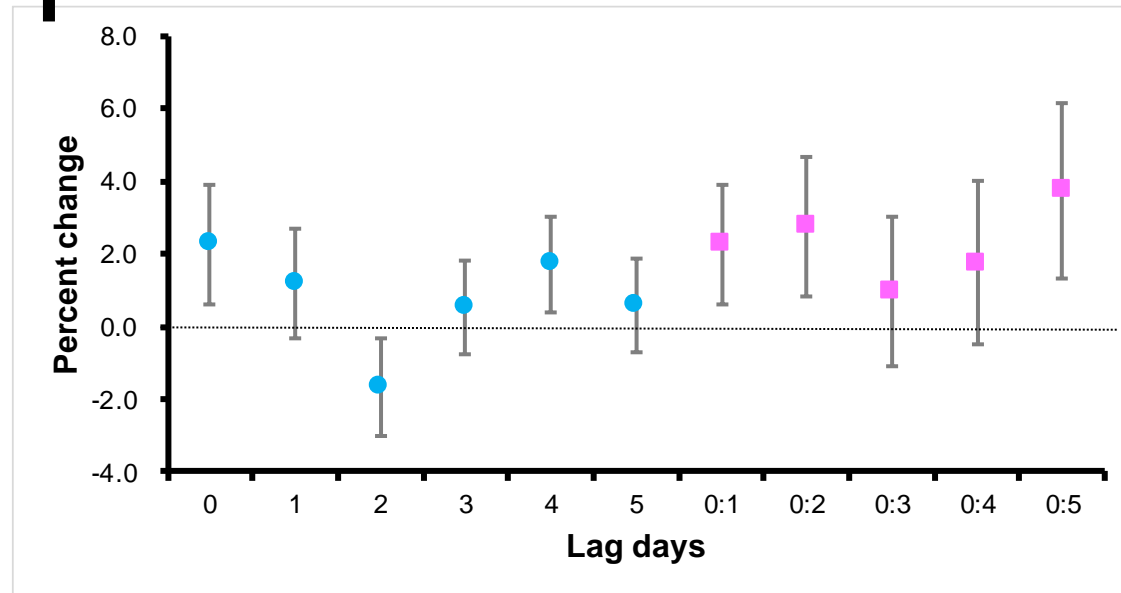

Supplement: Supplemental_Figure_5_20210325.pdf [file Supplemental_Figure_5_20210325.pdf]

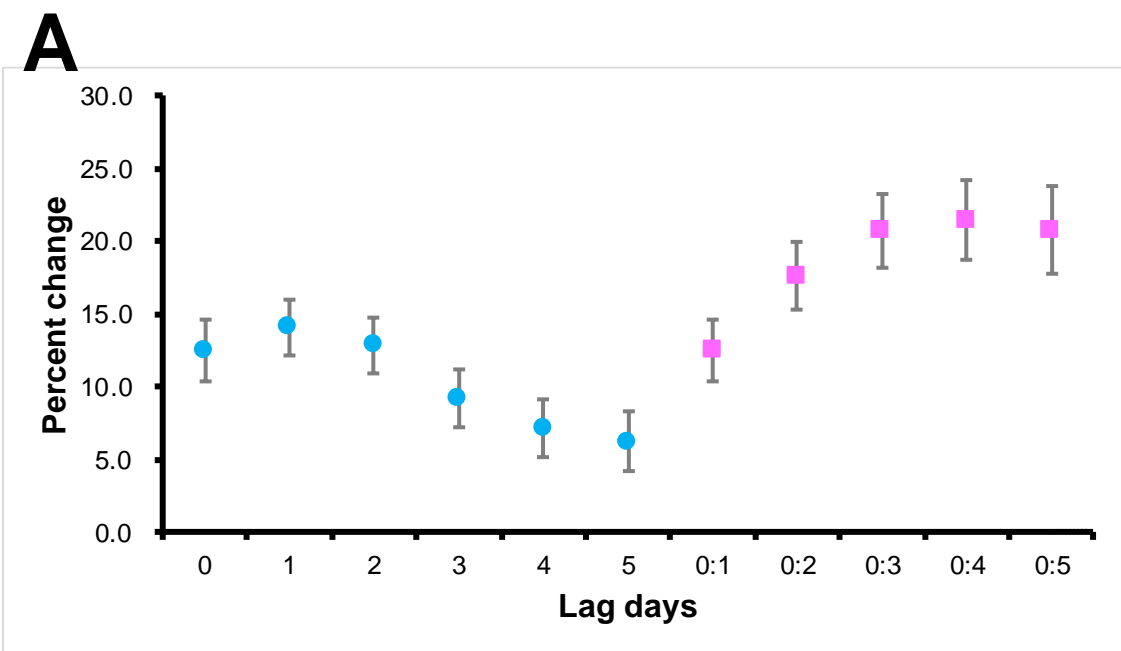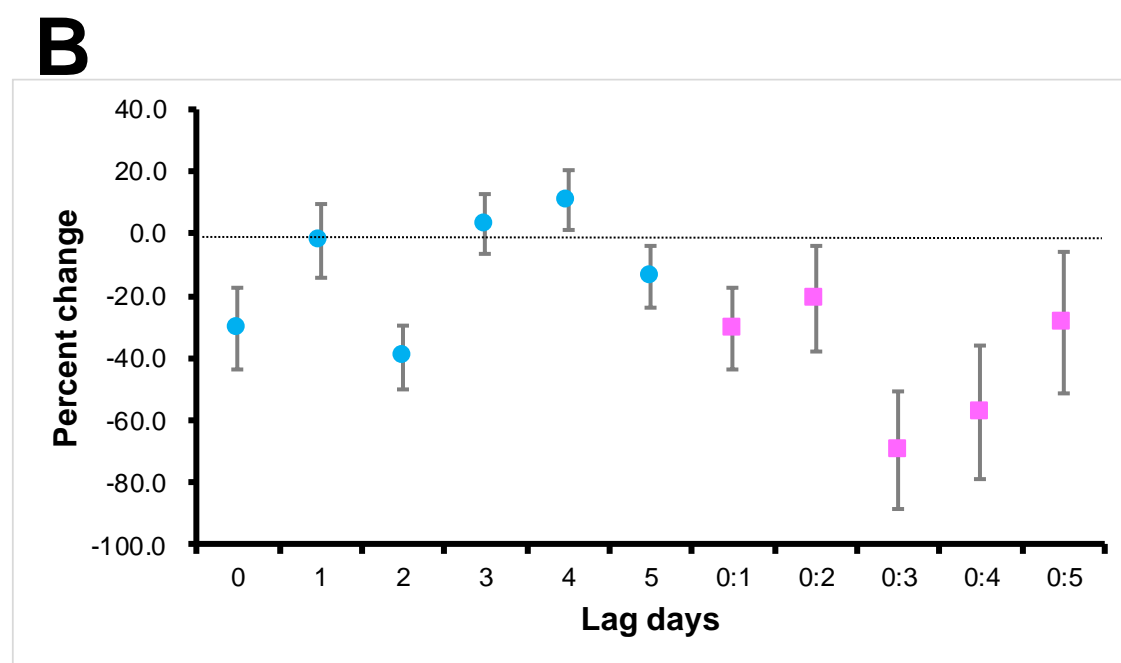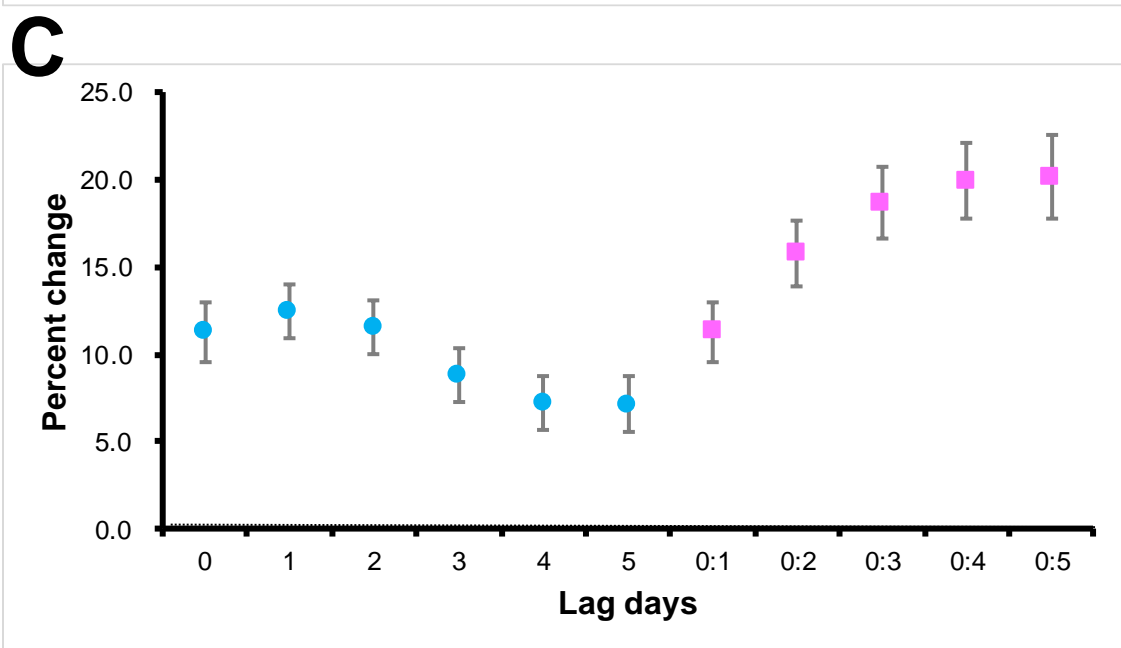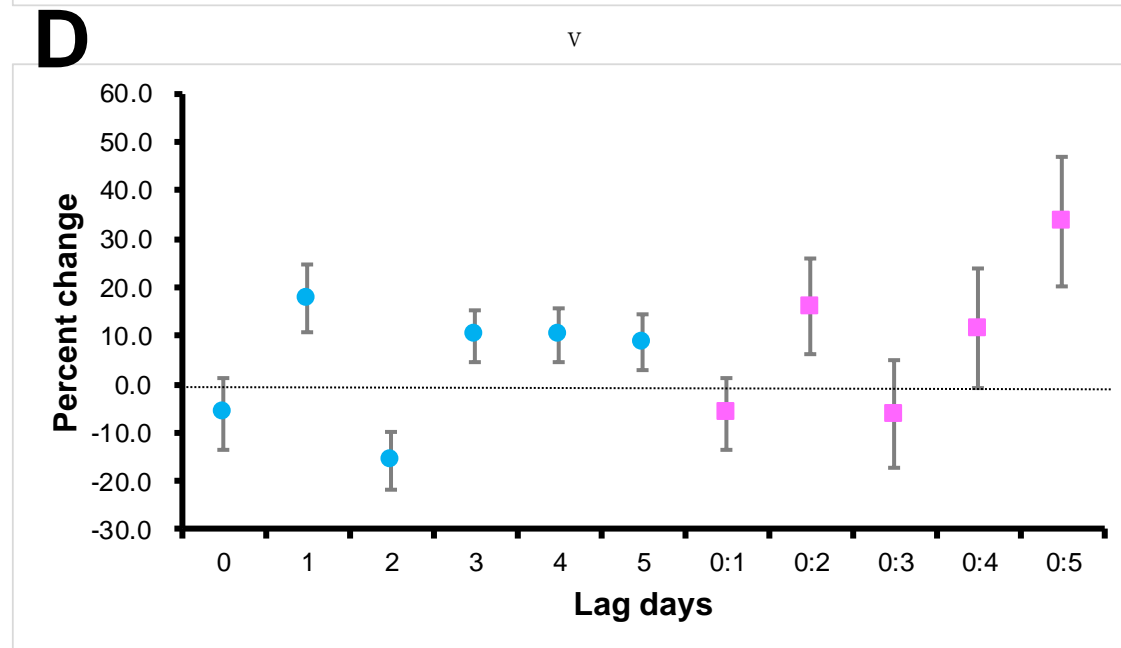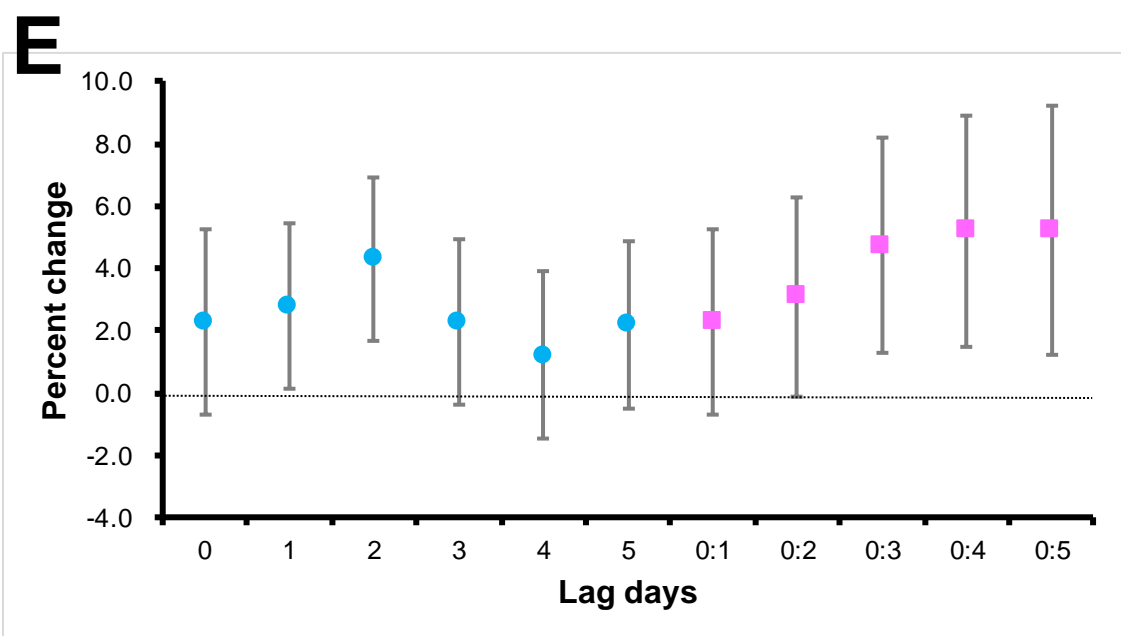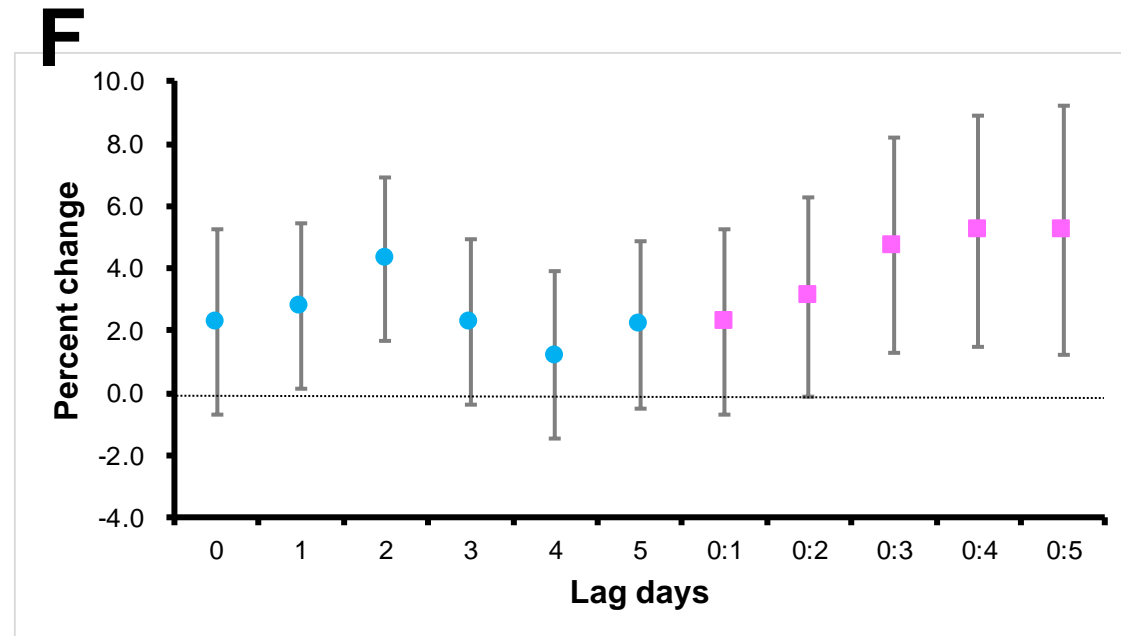

Supplement: Supplemental_Figure_6_20210325.pdf [file Supplemental_Figure_6_20210325.pdf]

**A**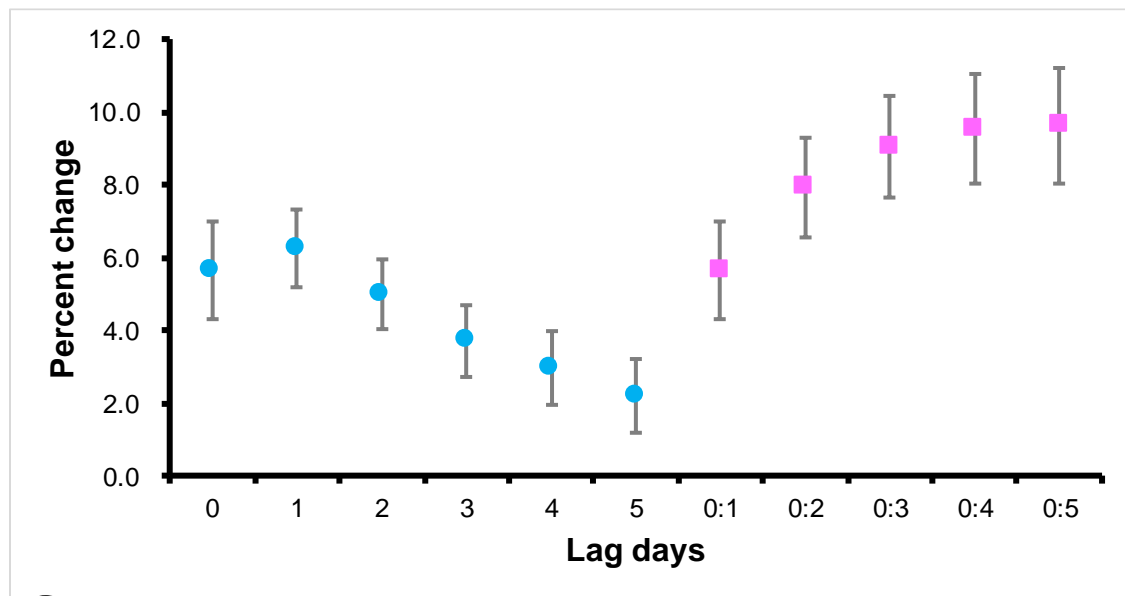**B**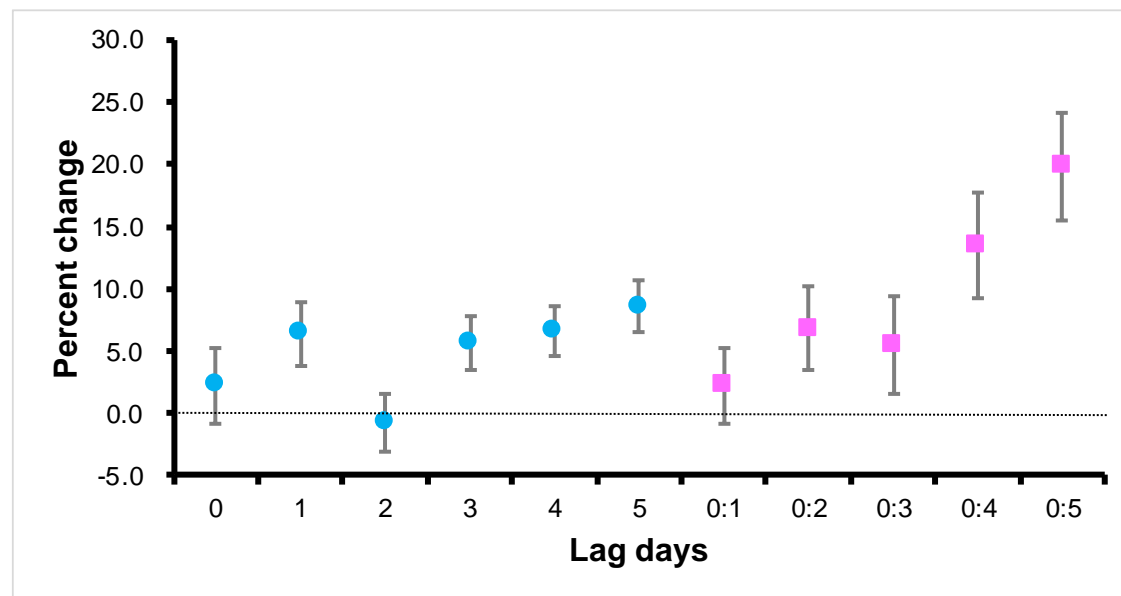**C**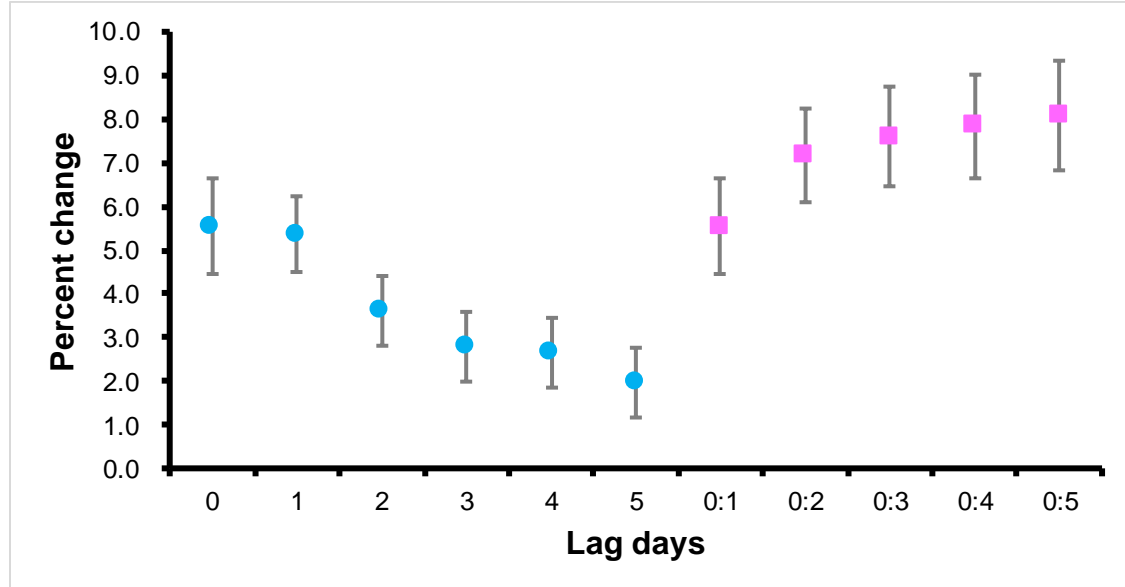**D**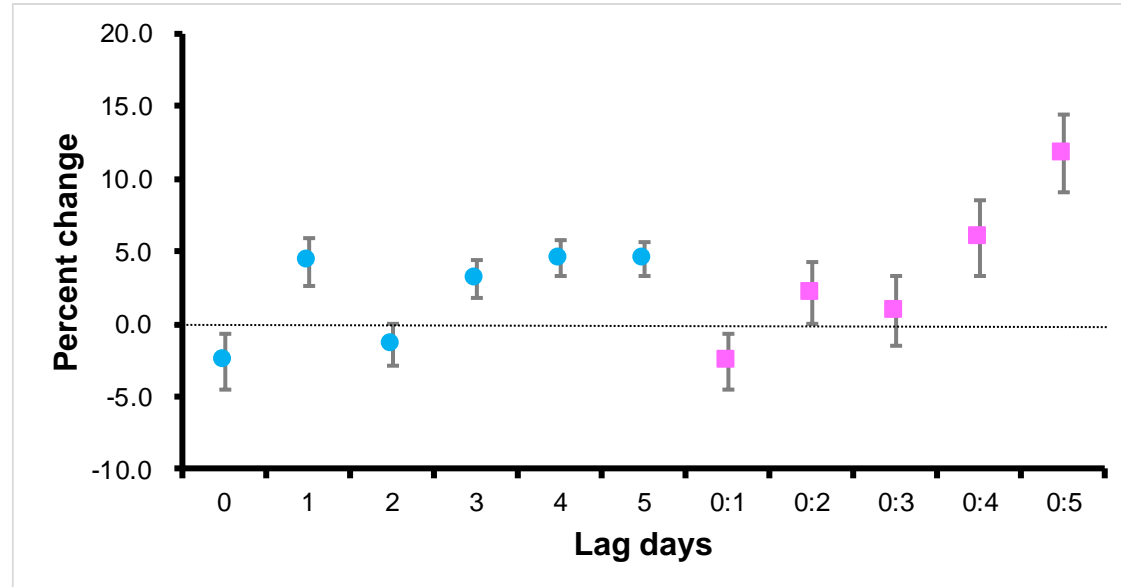**E**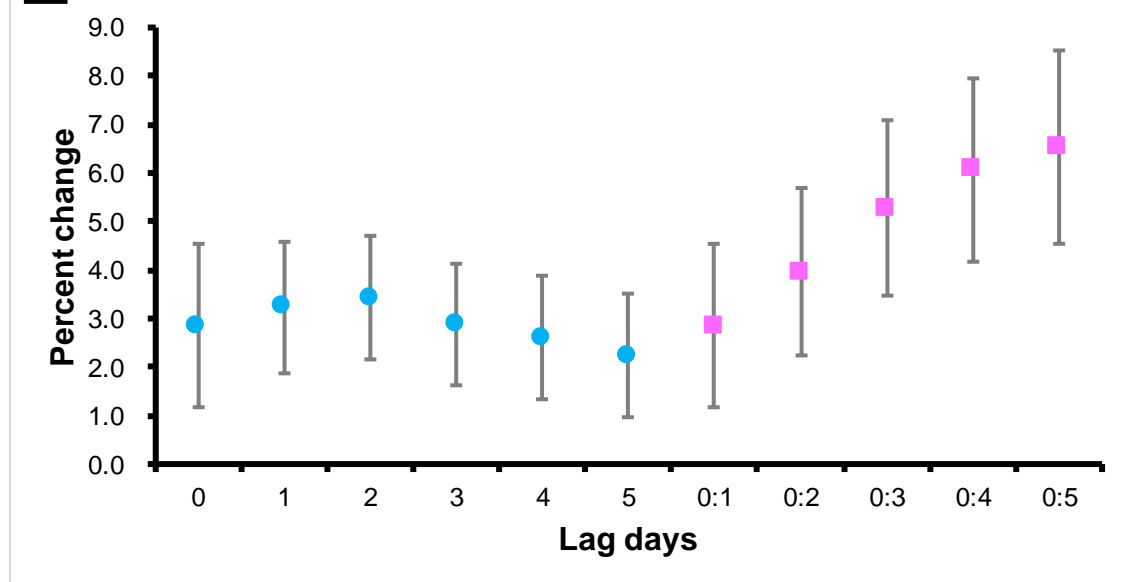**F**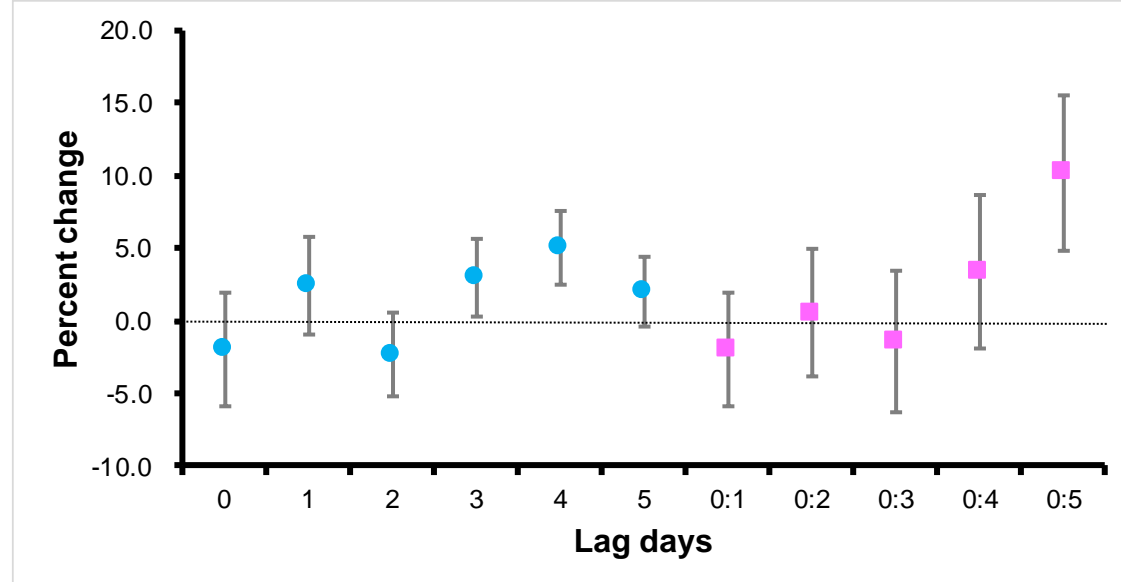

Supplement: Supplemental_Figure_7_20210325.pdf [file Supplemental_Figure_7_20210325.pdf]

**A**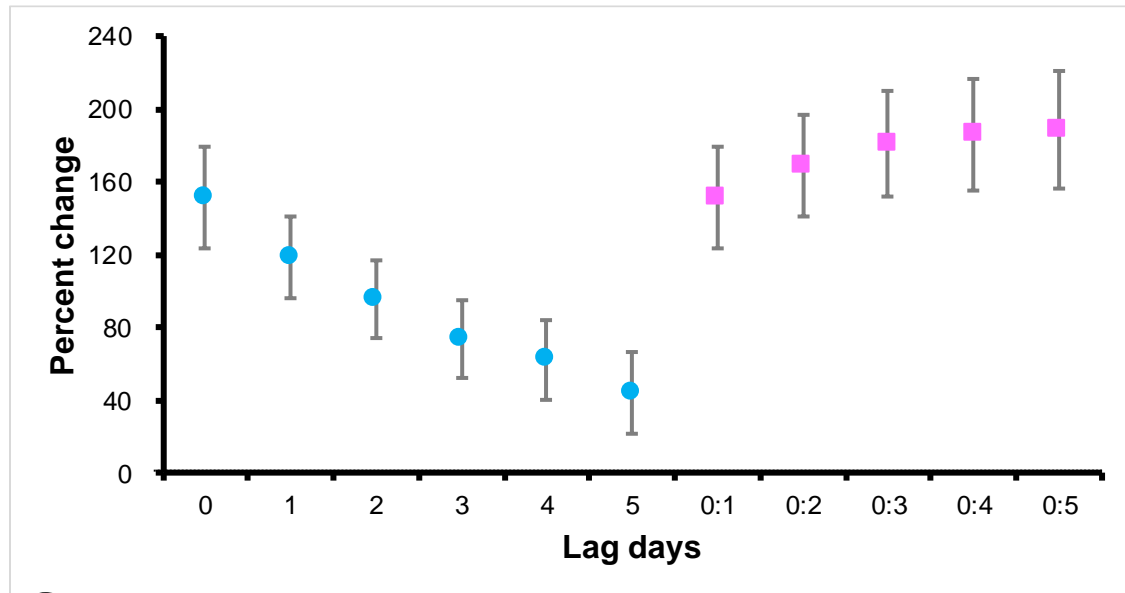**B**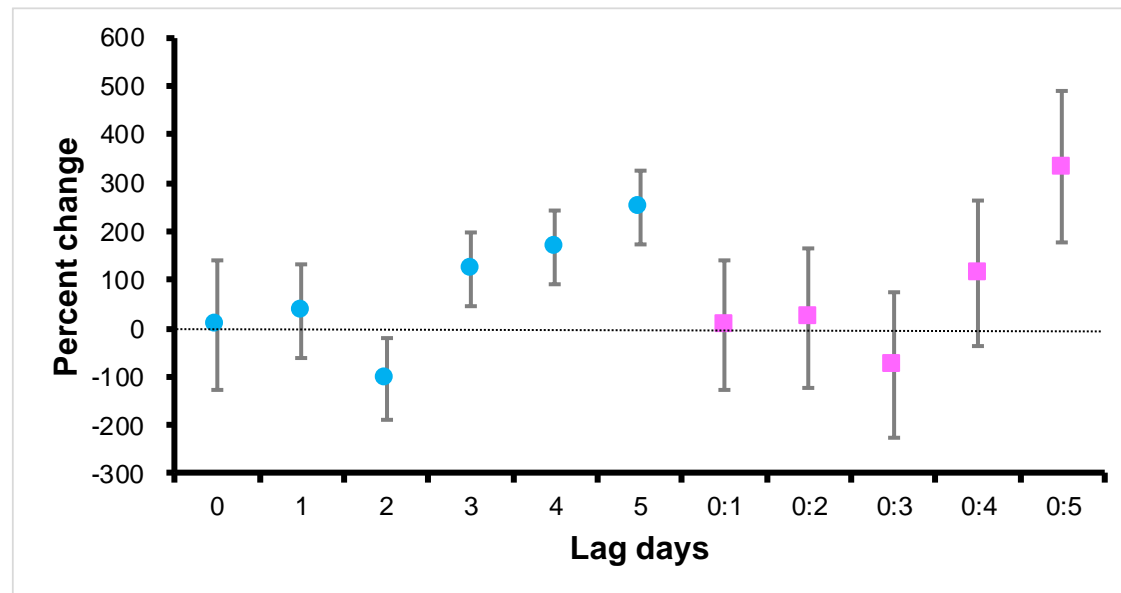**C**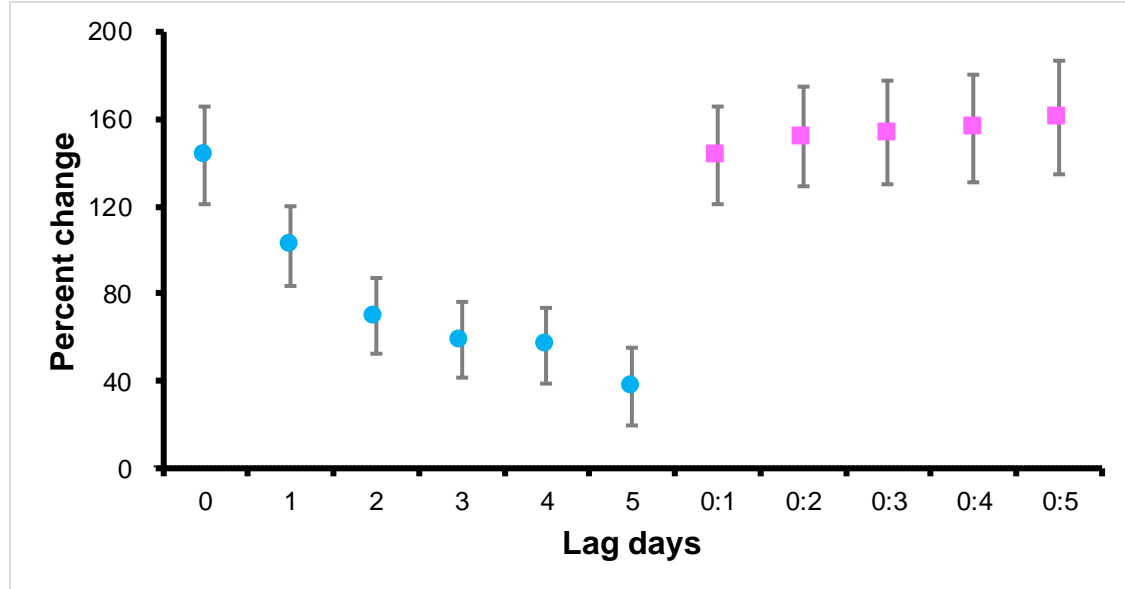**D**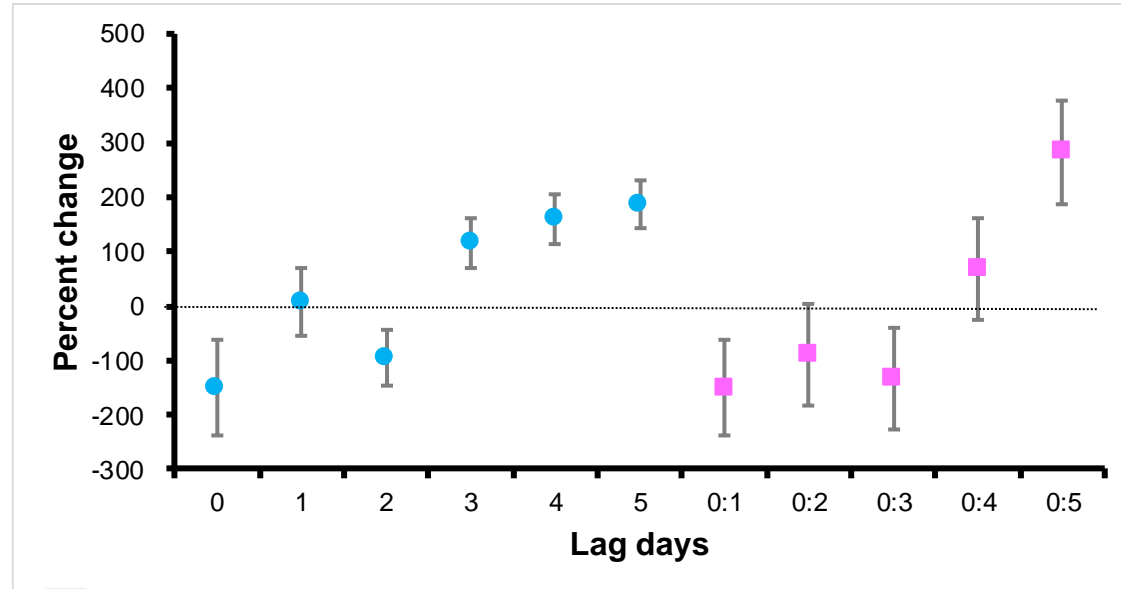**E**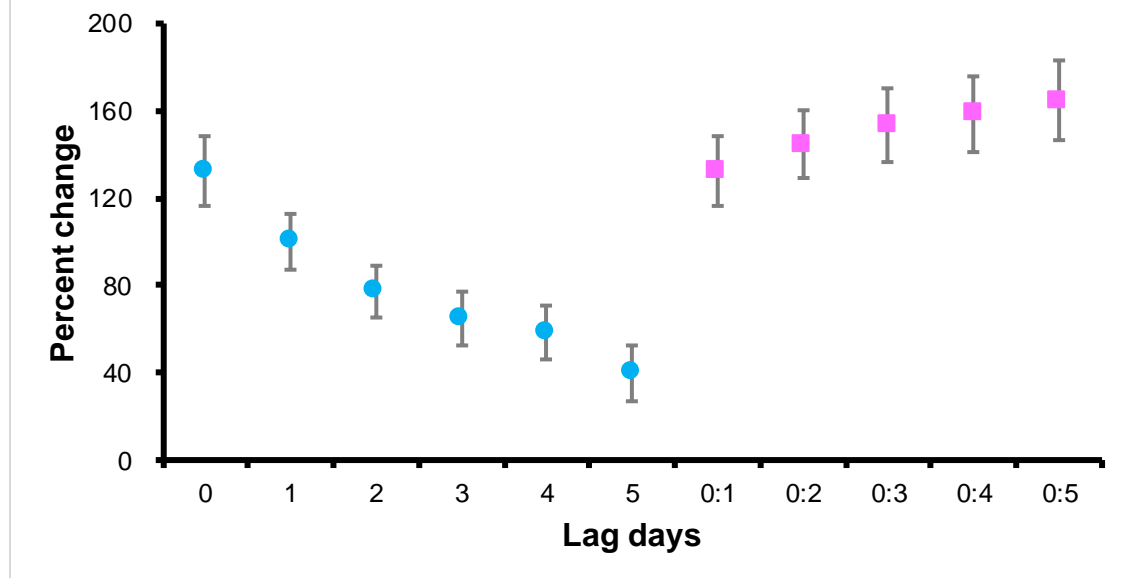**F**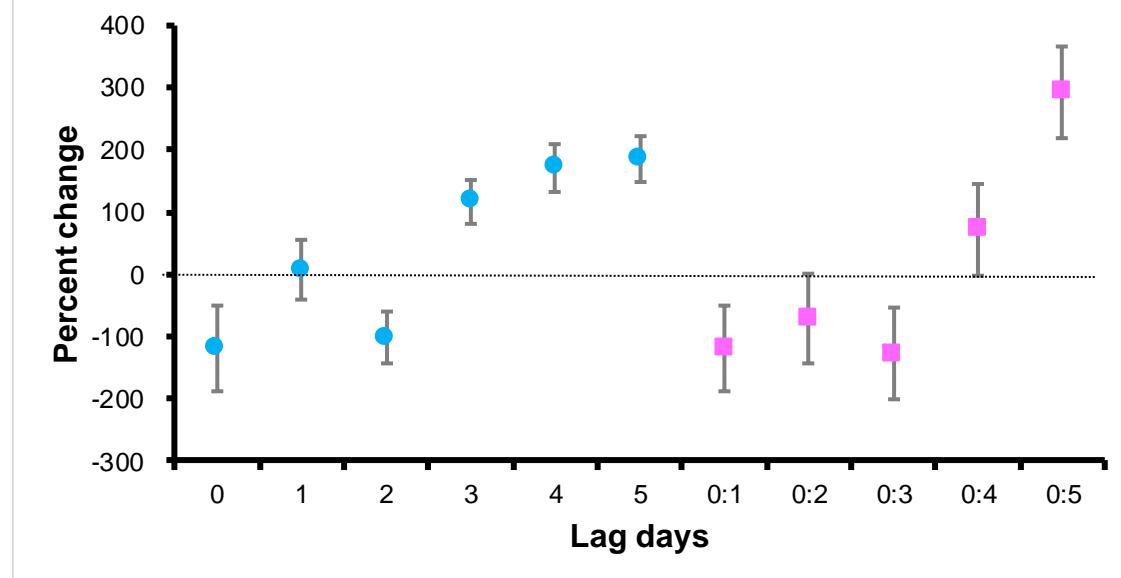

Supplement: Supplemental_Figure_8_20210325.pdf [file Supplemental_Figure_8_20210325.pdf]

**A**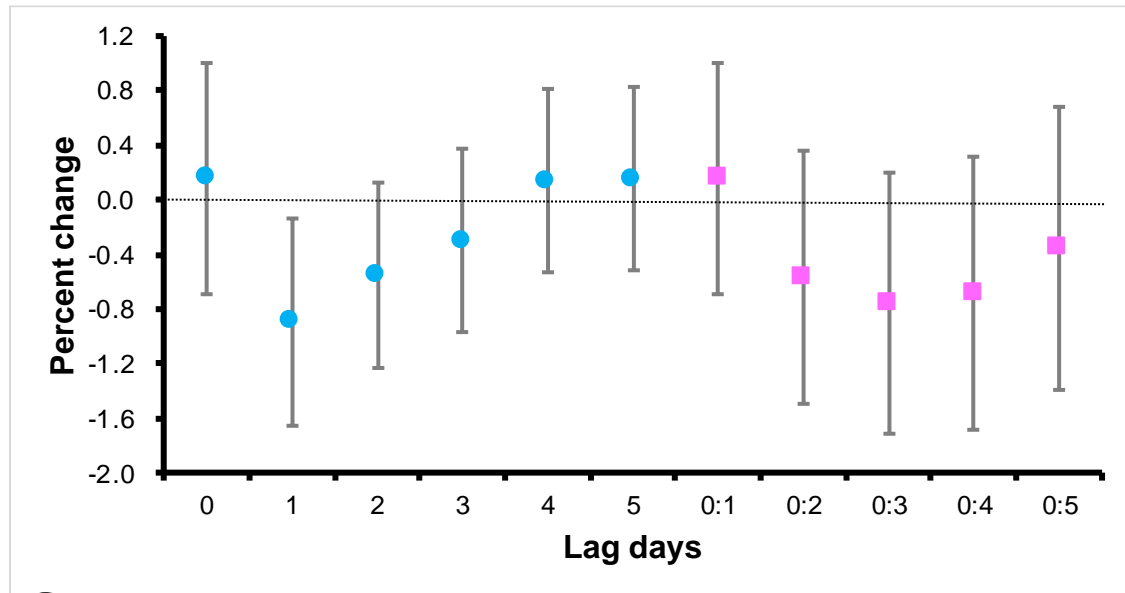**B**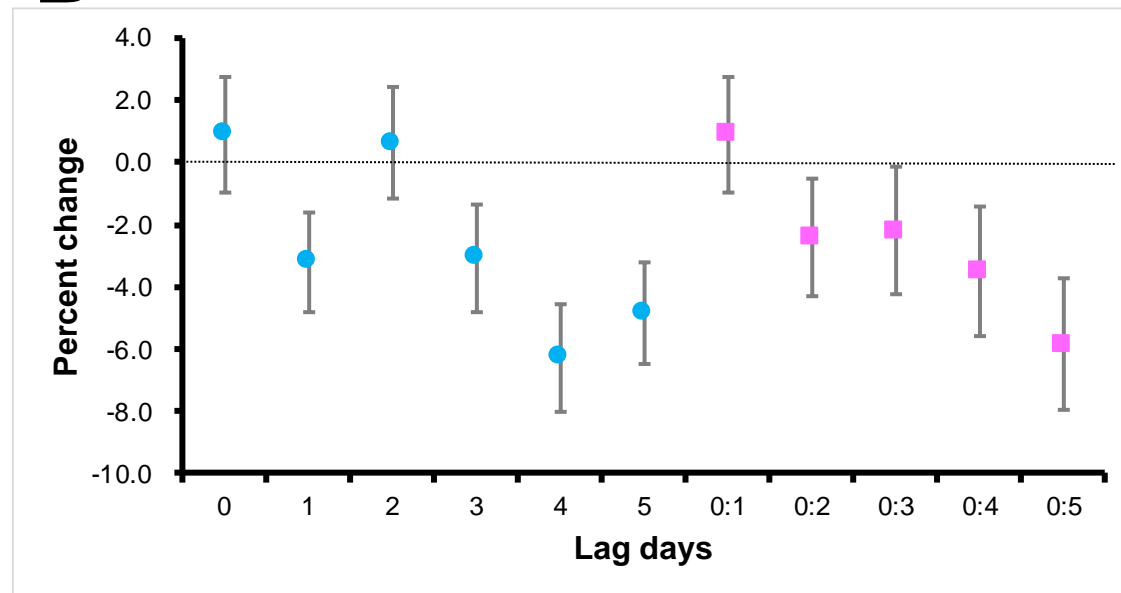**C**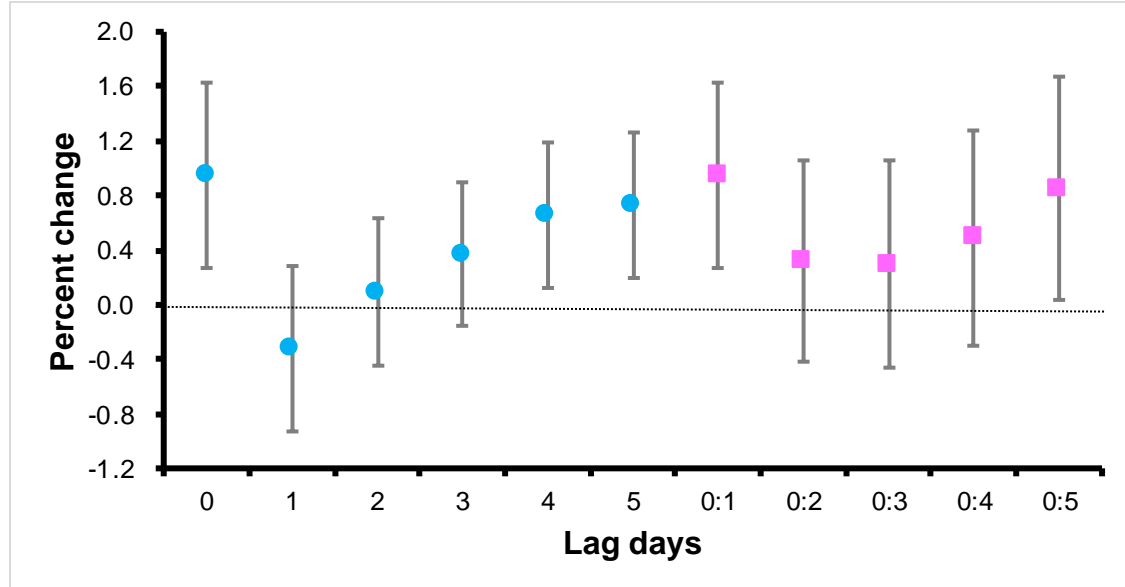**D**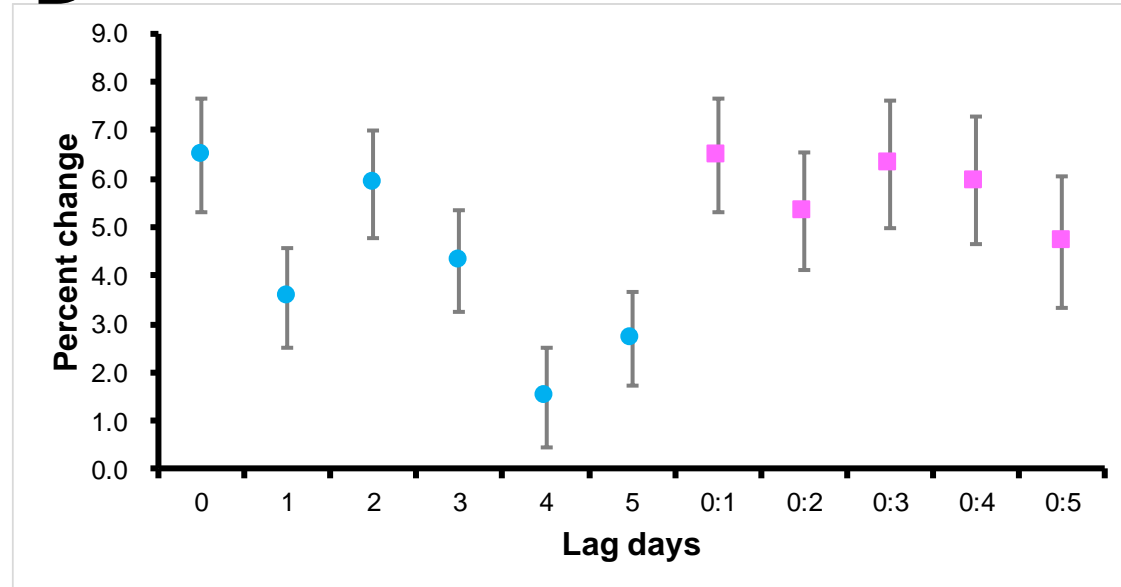**E**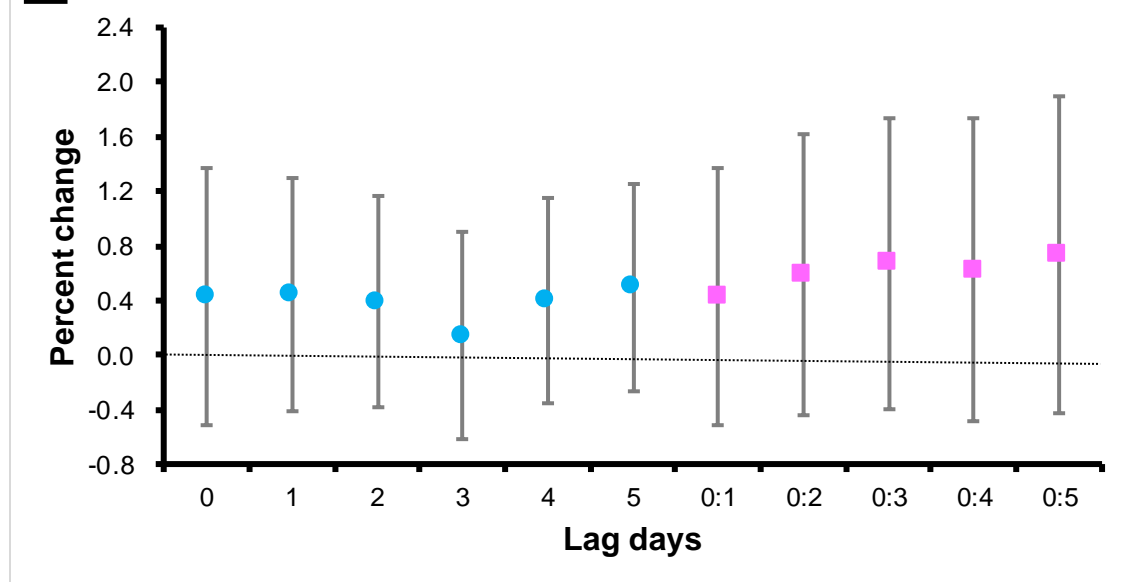**F**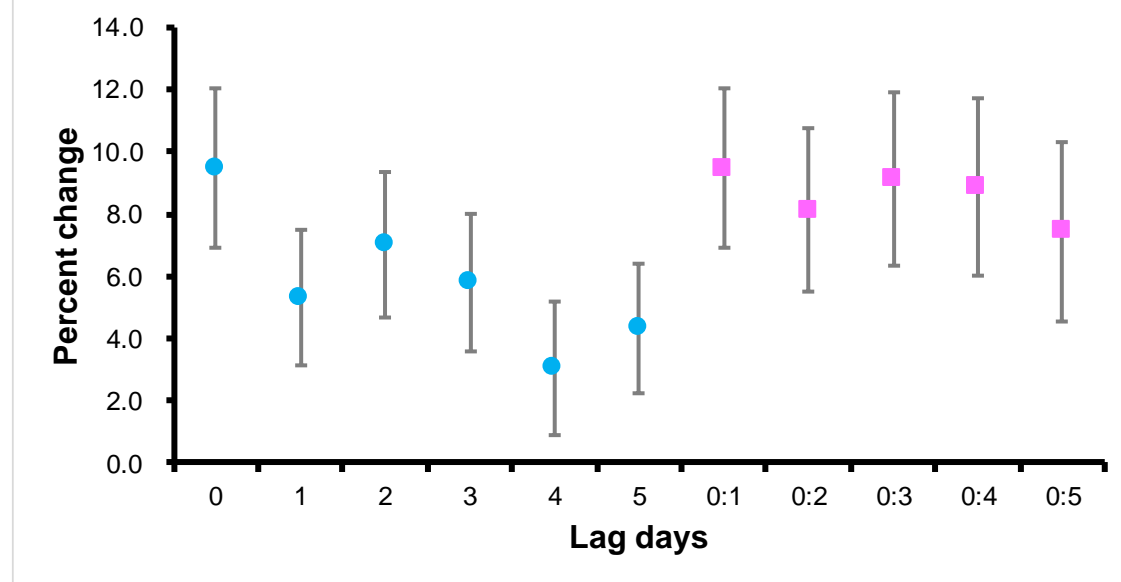

Supplement: Supplemental_Figure_9_20210325.pdf [file Supplemental_Figure_9_20210325.pdf]
